# Supplementary material
Source: Royal Society of Chemistry journal article supplement (doi:10.1039/d6ob00394j)
Supplement: d6ob00394j1.pdf [file d6ob00394j1.pdf]

**Supplementary Information**

**for**

**Late-Stage Peptide Nitroarylation: Stereoelectronic Tuning and  
Molecular Recognition**

Jenna M. Cain, Moira C. Dowling, Magdalena C. DiGiorno, Ashley M. Banaszek, and  
Nicholas Sawyer\*

Department of Chemistry and Biochemistry, Fordham University, Bronx, NY 10458, USA

Email: [nsawyer@fordham.edu](mailto:nsawyer@fordham.edu)

## Table of Contents

| <b>Supporting Material</b>                                                                               | <b>Page</b>     |
|----------------------------------------------------------------------------------------------------------|-----------------|
| <b>Supporting Figures</b>                                                                                |                 |
| <b>Figure S1.</b> Correlation of Hammett coefficients with nitroaryl amino acid properties               | <b>S3</b>       |
| <b>Figure S2.</b> UV-visible spectra for nitroarylated Cys/Dap model peptides <b>C1-C33, C35, D1-D34</b> | <b>S4-S36</b>   |
| <b>Figure S3.</b> Plasmin assay data                                                                     | <b>S37</b>      |
| <b>Figure S4.</b> Analytical HPLC chromatograms for all peptides                                         | <b>S38-64</b>   |
| <b>Figure S5.</b> NMR spectra for peptides <b>C1-C33, C35, D1-D34</b>                                    | <b>S65-97</b>   |
| <b>Supporting Tables</b>                                                                                 |                 |
| <b>Table S1.</b> Nitroarene reagents                                                                     | <b>S98-100</b>  |
| <b>Table S2.</b> MALDI mass spectrometry characterization of peptides                                    | <b>S101-117</b> |
| <b>Materials and Methods</b>                                                                             | <b>S118-121</b> |
| <b>References</b>                                                                                        | <b>S122</b>     |

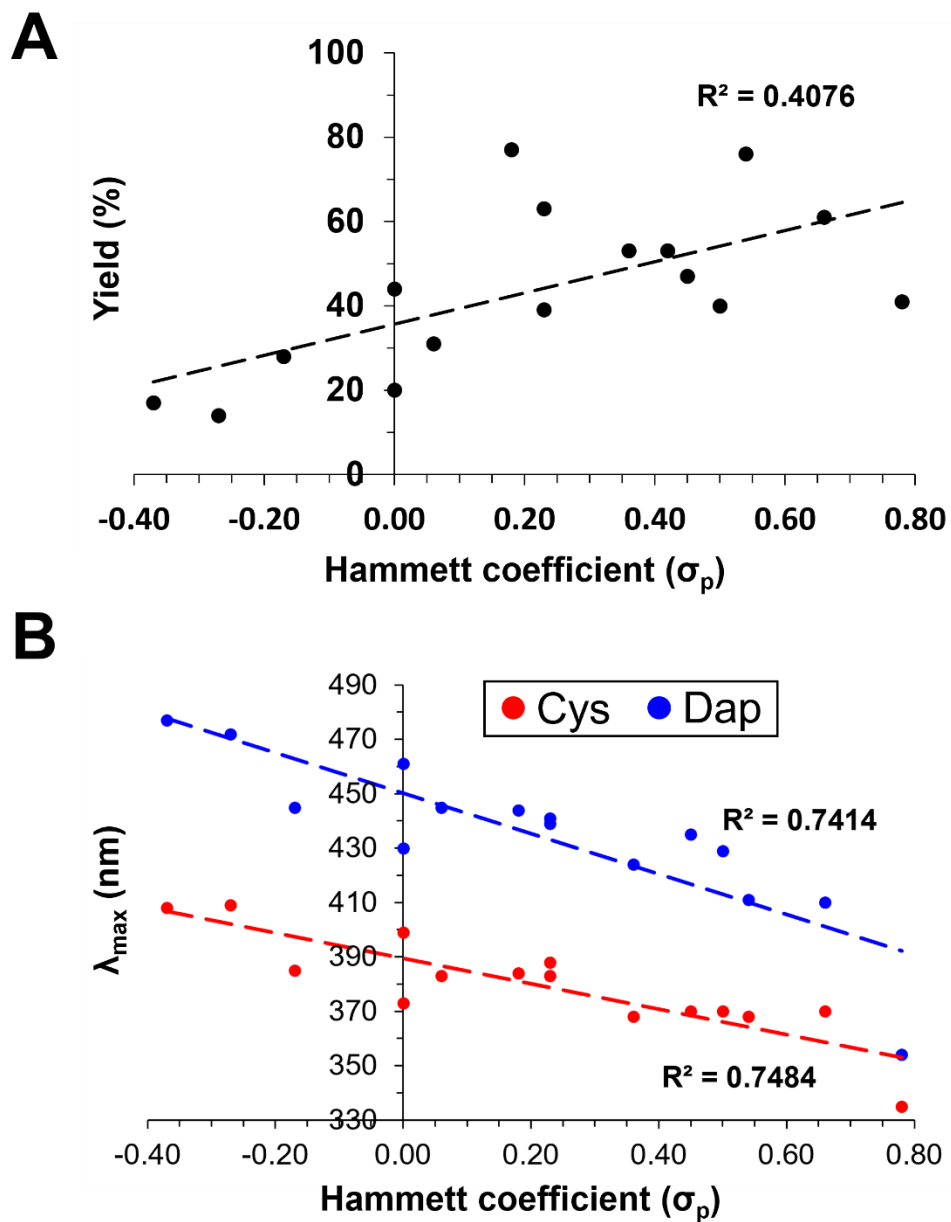

**Figure S1. Correlation of Hammett coefficients with nitroaryl amino acid properties.** A) Isolated yields for Dap nitroarylation and B) near UV/visible absorption maxima ( $\lambda_{\max,2} > 320$  nm) for model Cys (red) and Dap (blue) peptides. Hammett coefficient values ( $\sigma_p$ ): H = 0.00, F = 0.06, Cl = 0.23, Br = 0.23, I = 0.18, CF<sub>3</sub> = 0.54, CH<sub>3</sub> = -0.17, CN = 0.66, COCH<sub>3</sub> = 0.50, CONH<sub>2</sub> = 0.36, COOH = 0.45, NHAc = 0.00, NO<sub>2</sub> = 0.78, OCH<sub>3</sub> = -0.27, OH = -0.37.

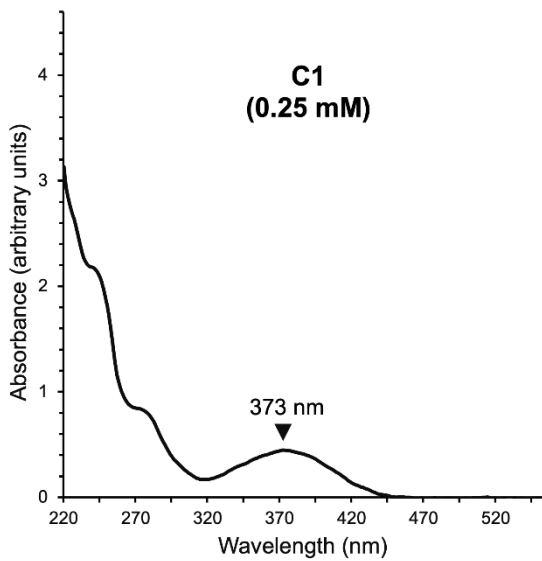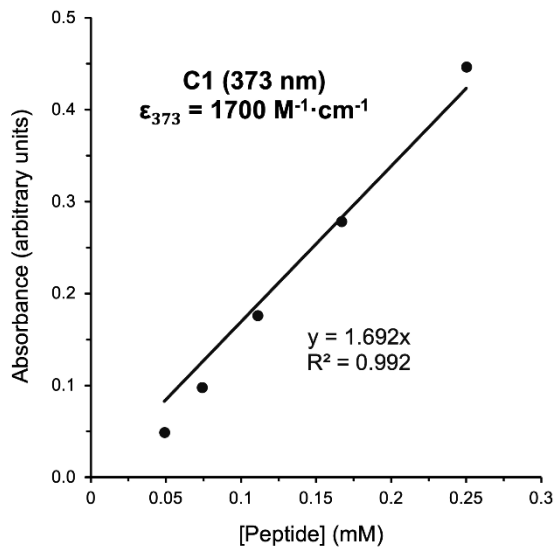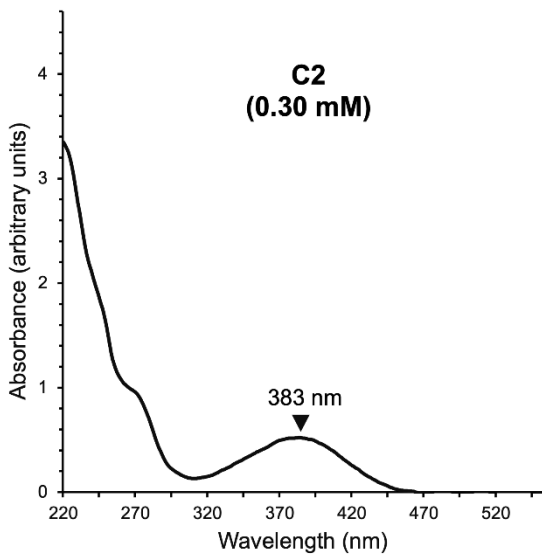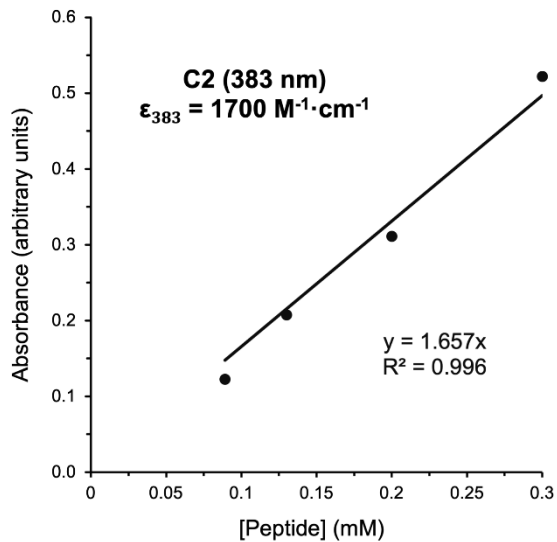

**Figure S2. UV-visible spectra for nitroarylated Cys/Dap model peptides**

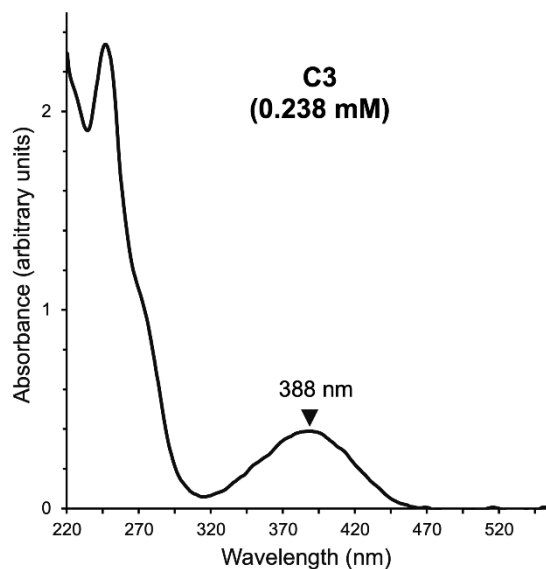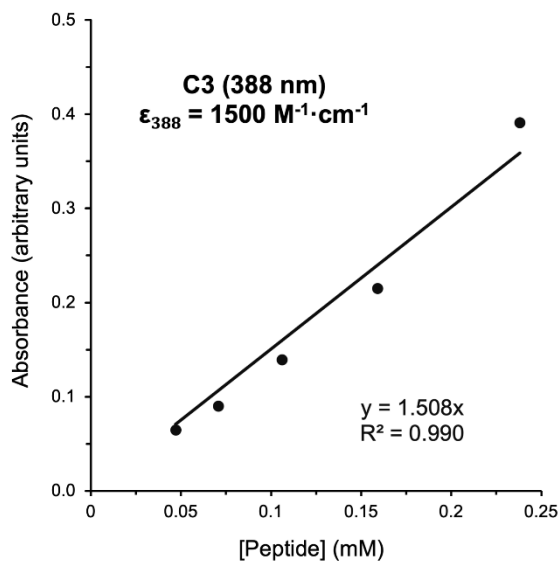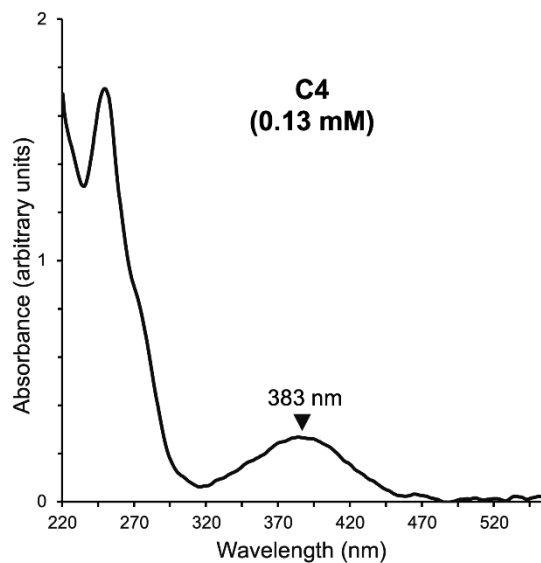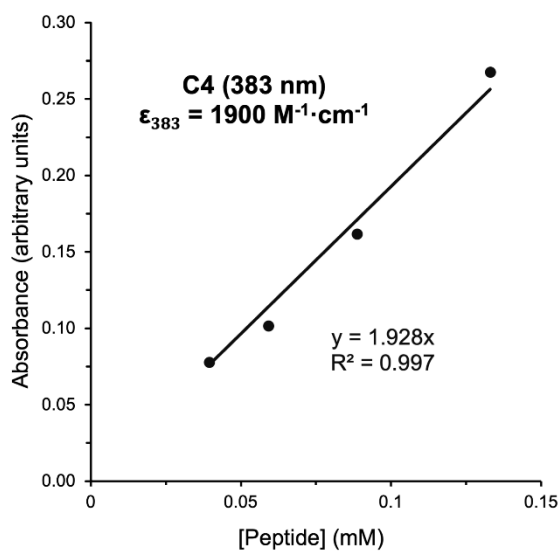

**Figure S2. UV-visible spectra for nitroarylated Cys/Dap model peptides (continued)**

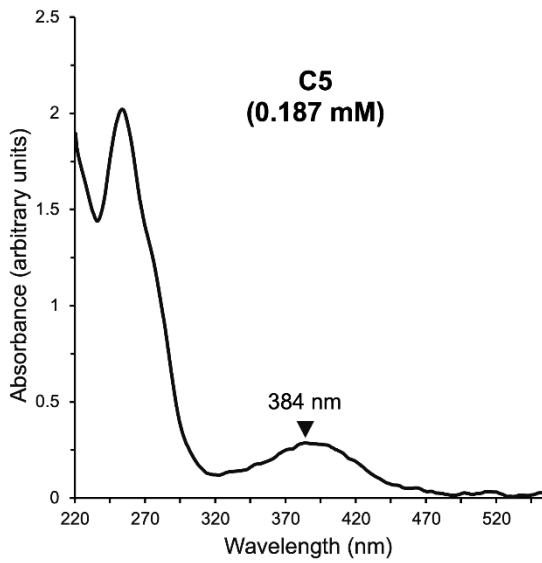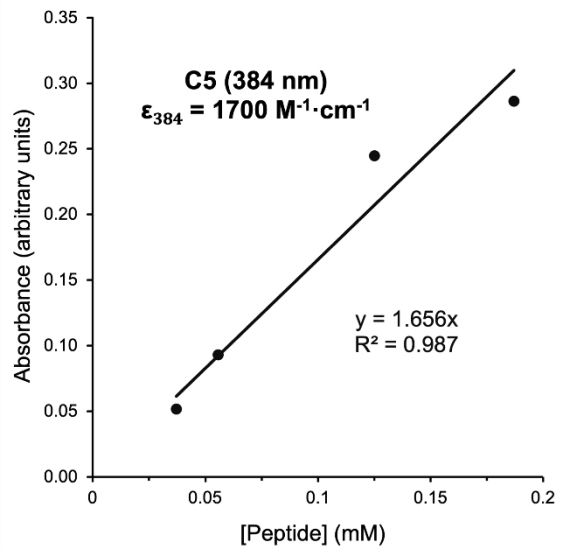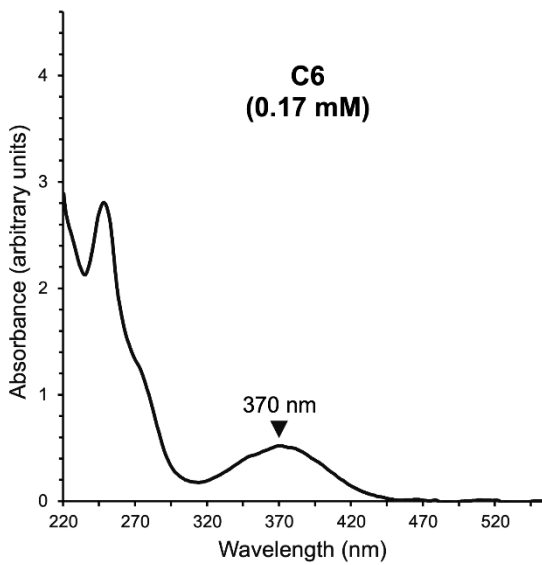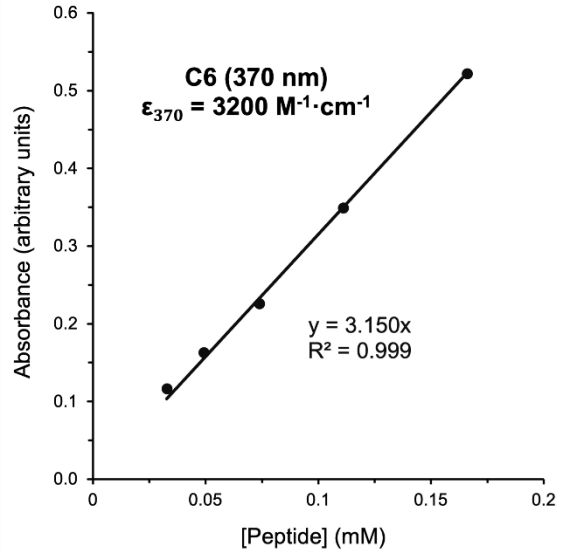

**Figure S2. UV-visible spectra for nitroarylated Cys/Dap model peptides (continued)**

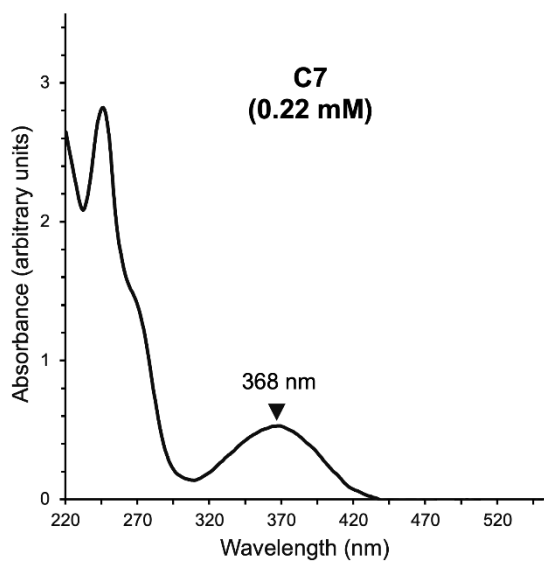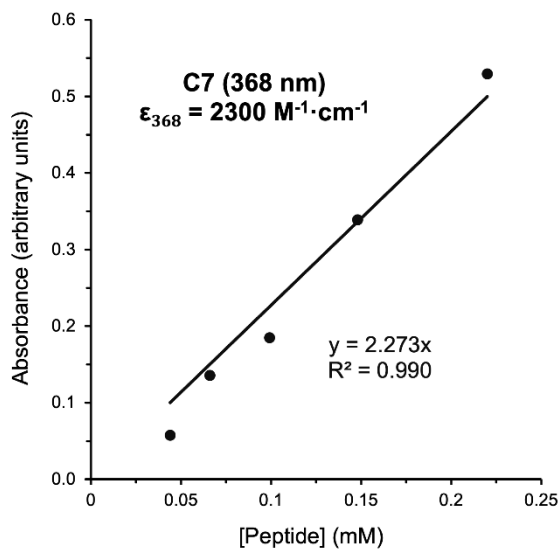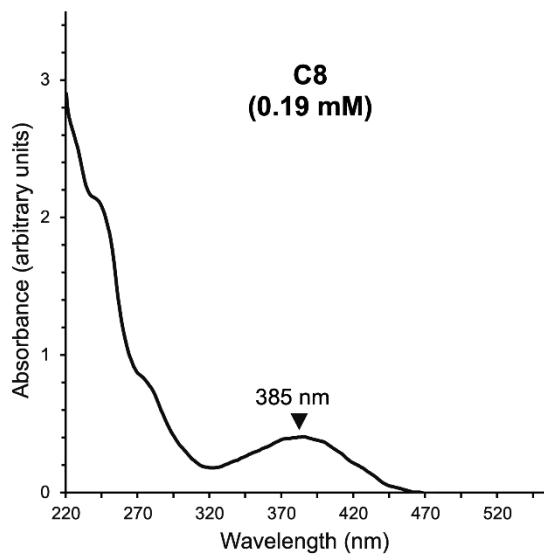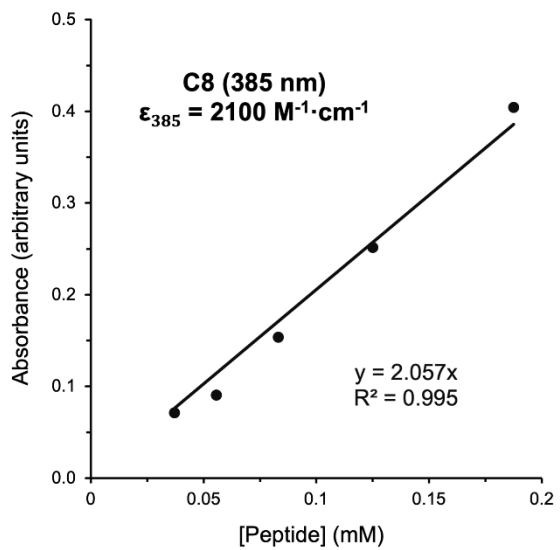

**Figure S2. UV-visible spectra for nitroarylated Cys/Dap model peptides (continued)**

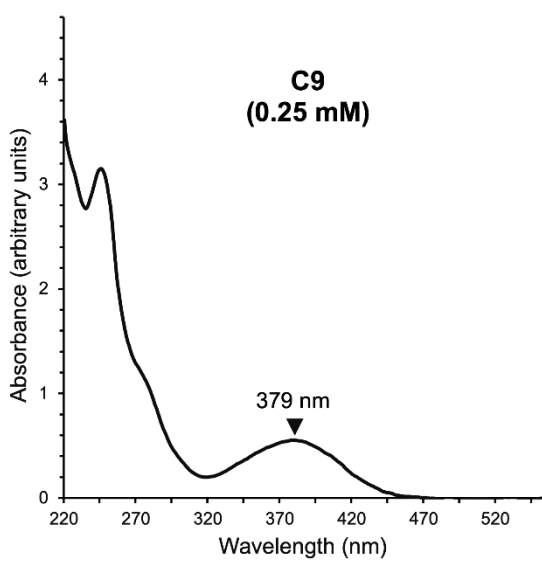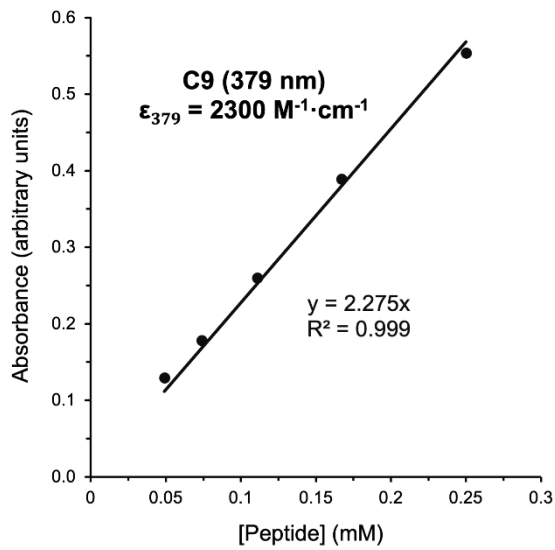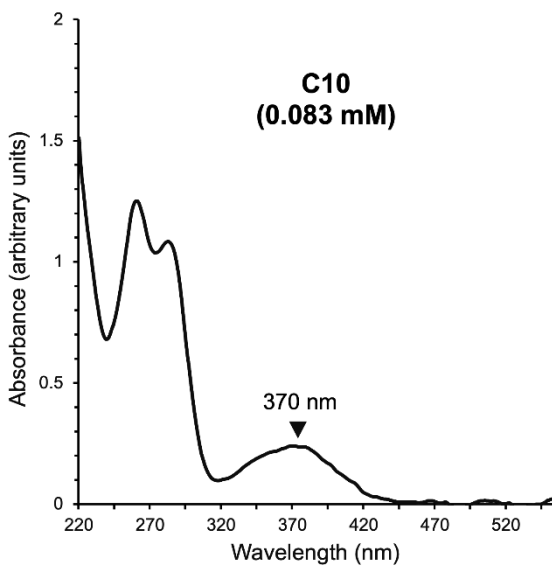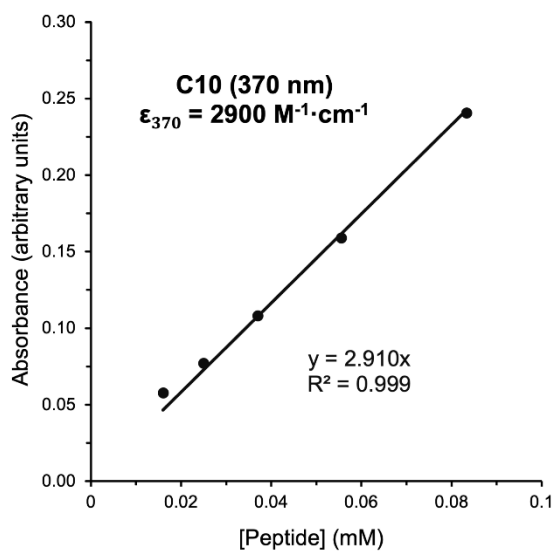

**Figure S2. UV-visible spectra for nitroarylated Cys/Dap model peptides (continued)**

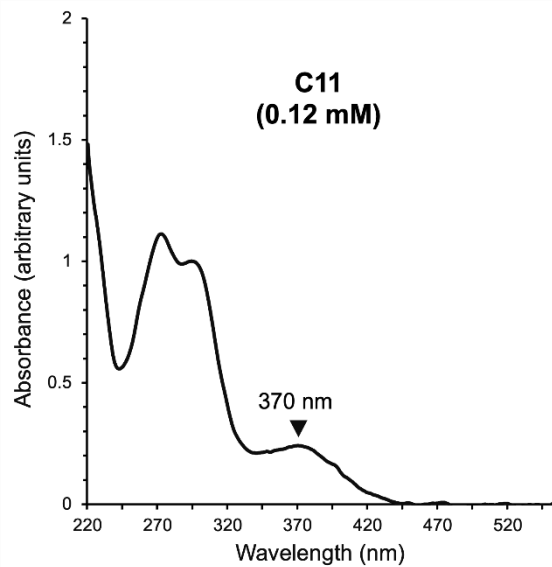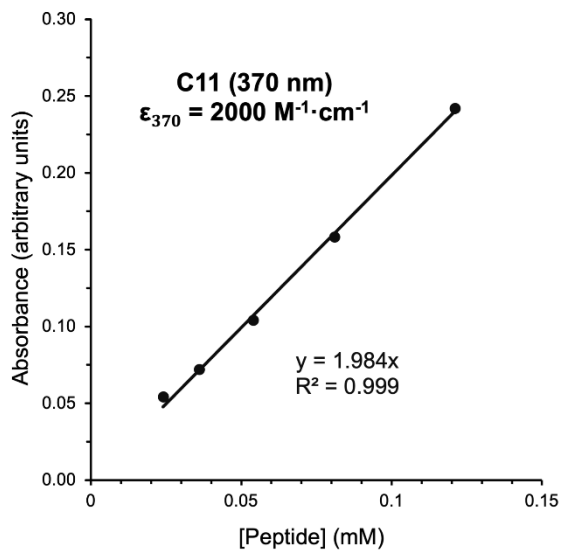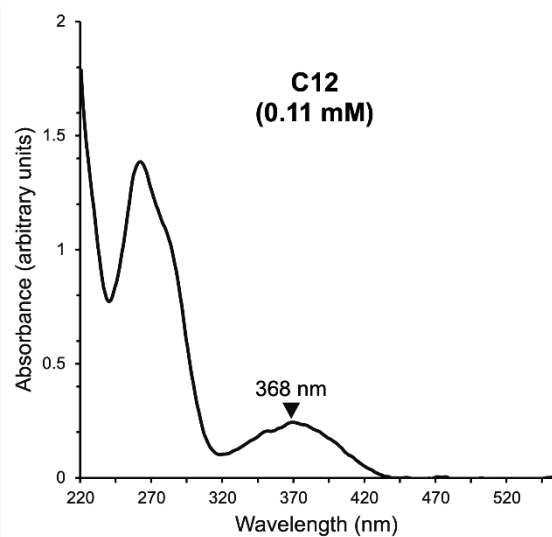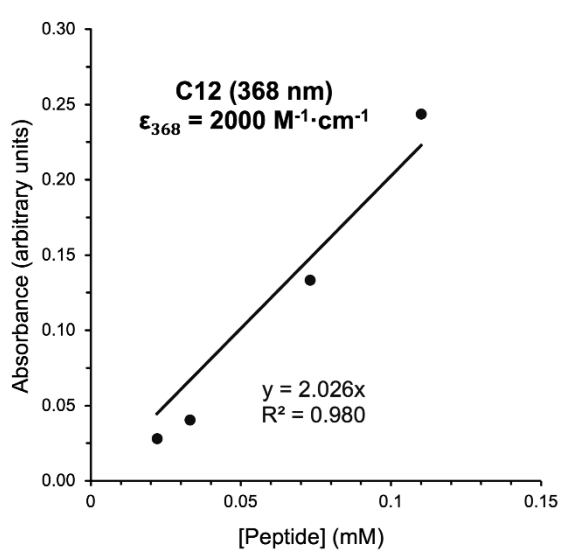

**Figure S2. UV-visible spectra for nitroarylated Cys/Dap model peptides (continued)**

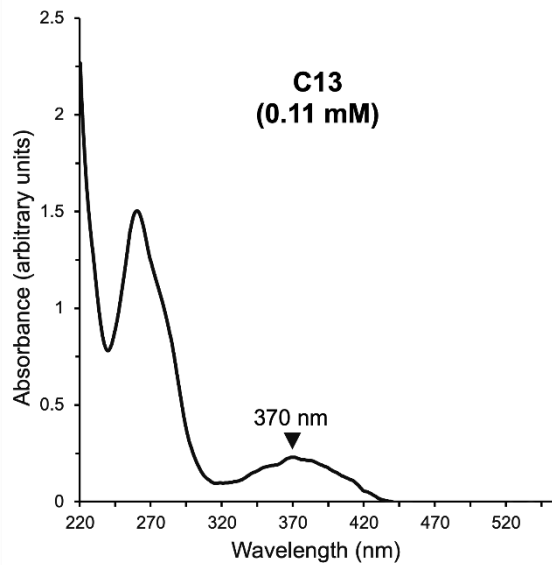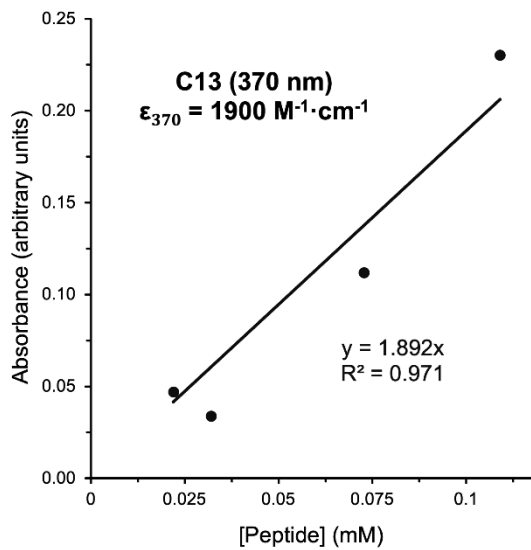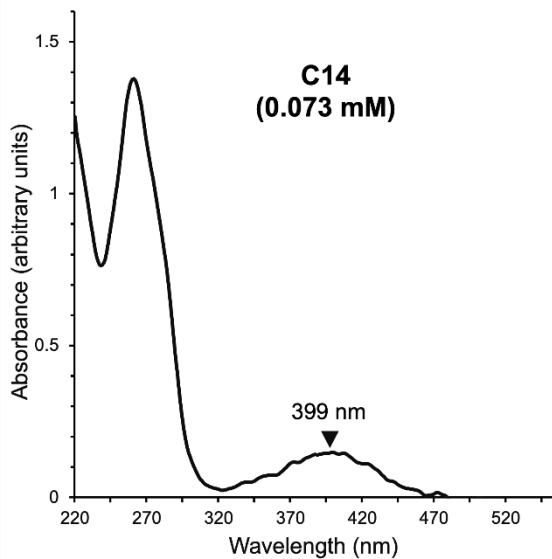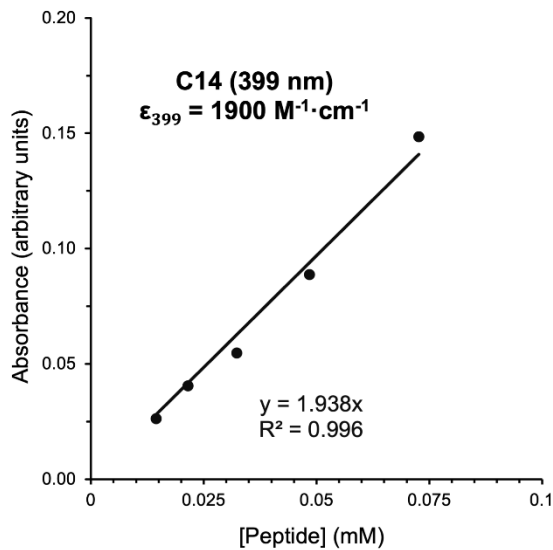

**Figure S2. UV-visible spectra for nitroarylated Cys/Dap model peptides (continued)**

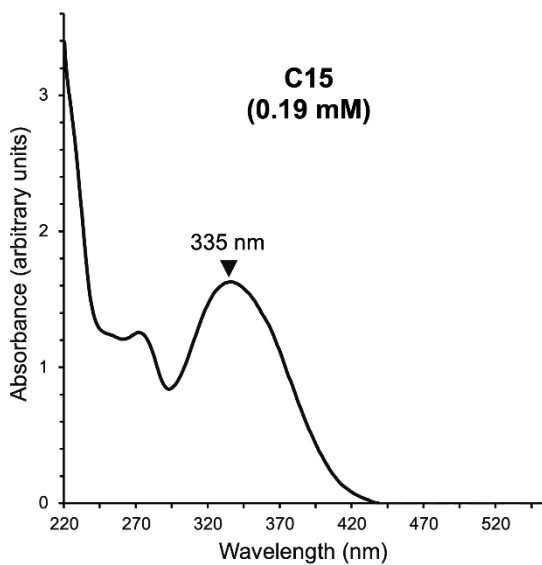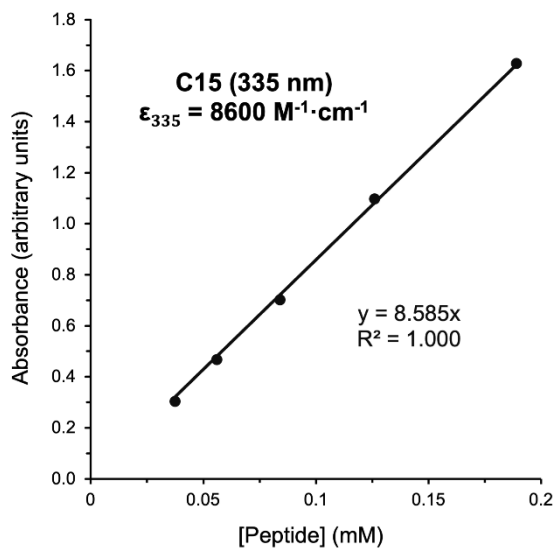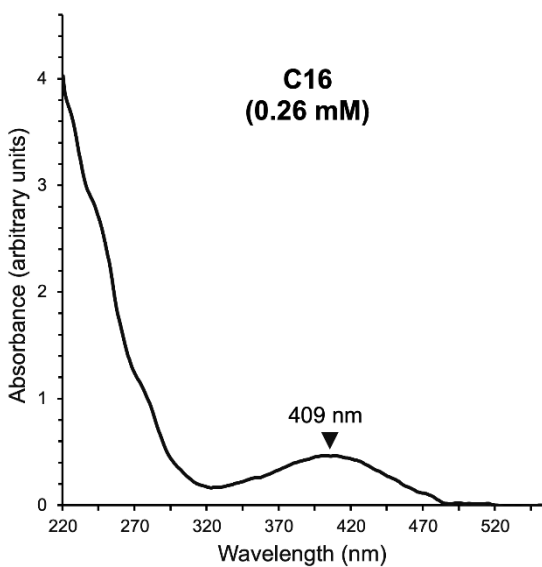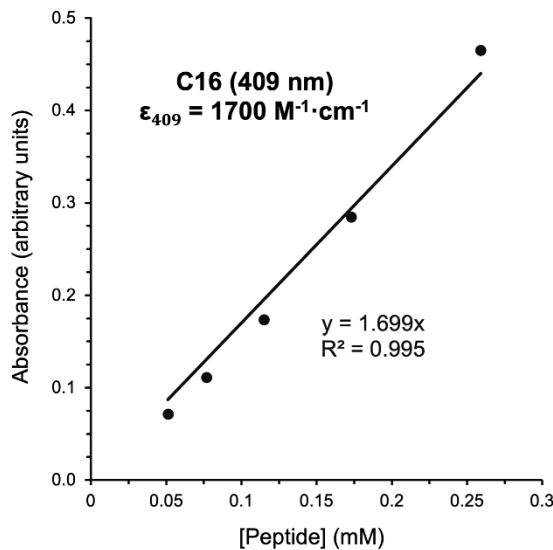

**Figure S2. UV-visible spectra for nitroarylated Cys/Dap model peptides (continued)**

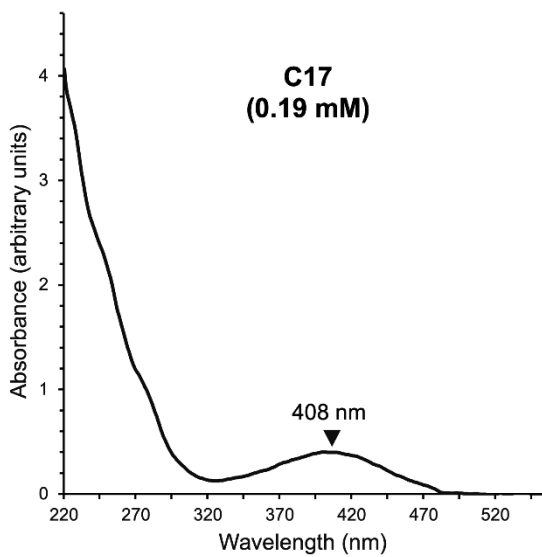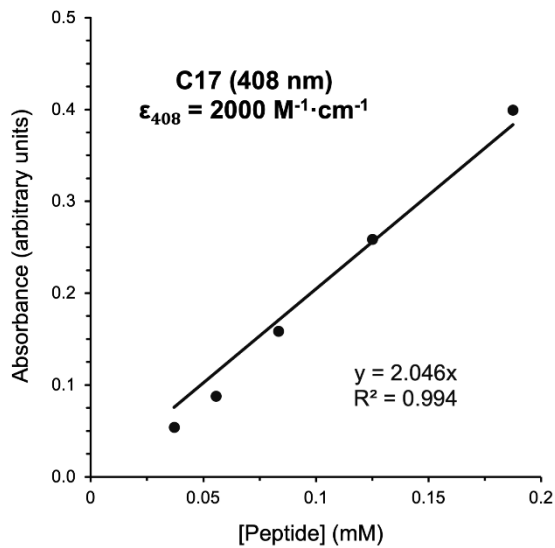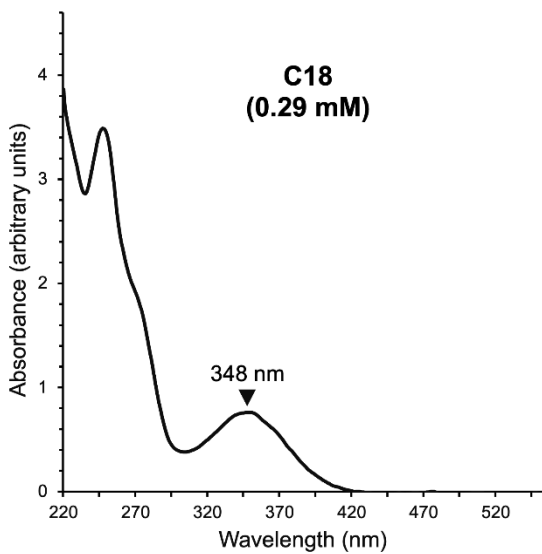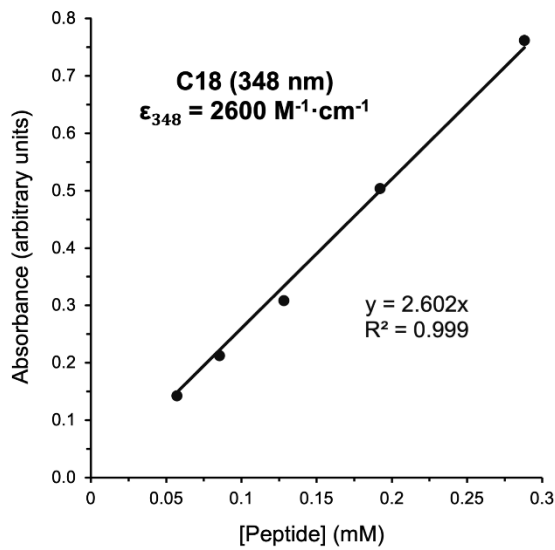

**Figure S2. UV-visible spectra for nitroarylated Cys/Dap model peptides (continued)**

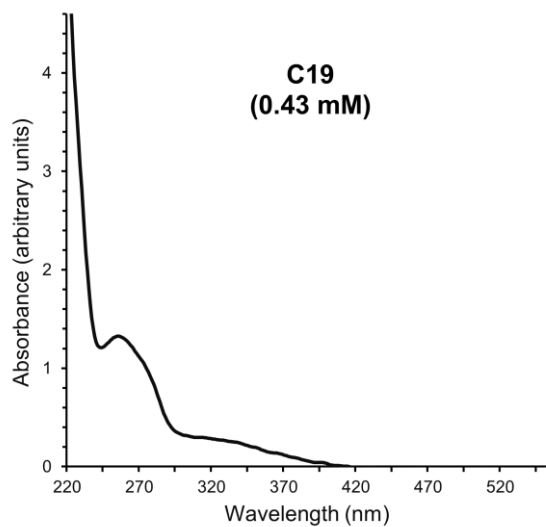

No local maximum > 300 nm

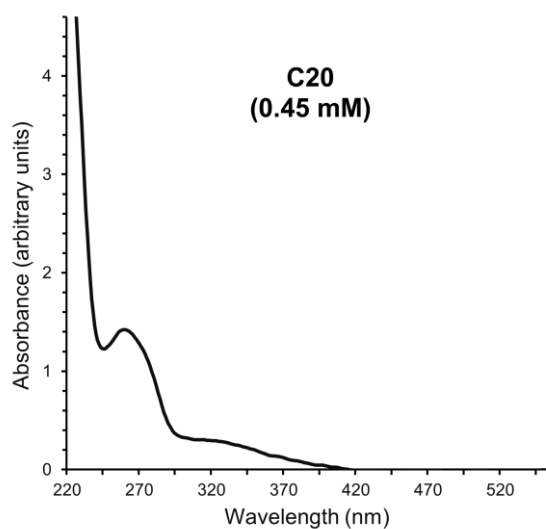

No local maximum > 300 nm

**Figure S2. UV-visible spectra for nitroarylated Cys/Dap model peptides (continued)**

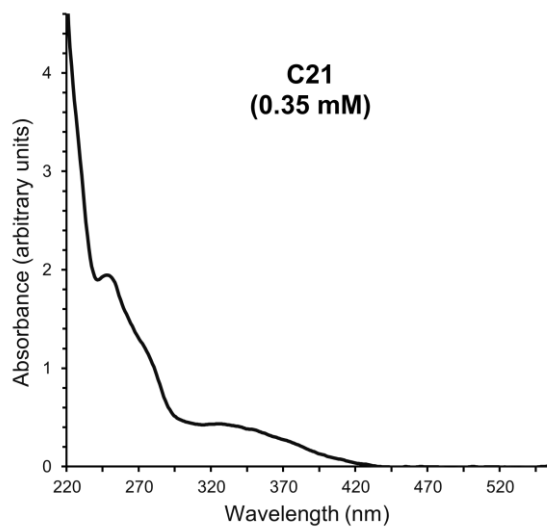

No local maximum > 300 nm

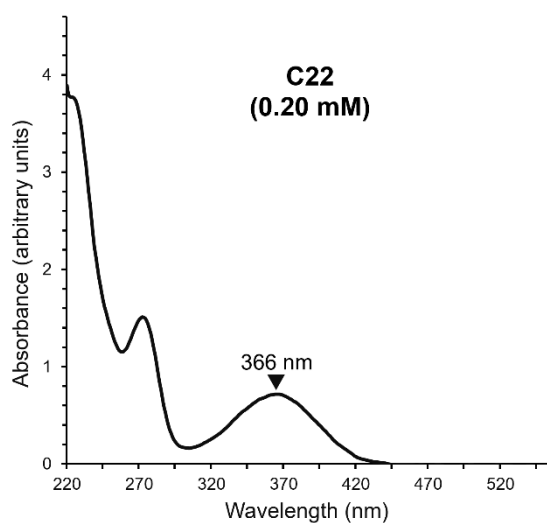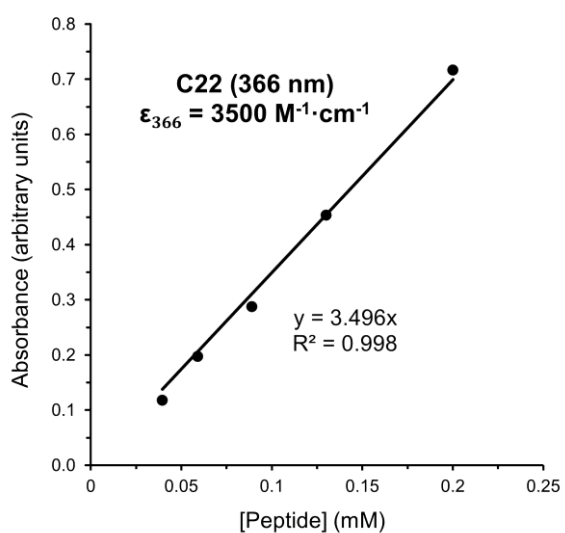

**Figure S2. UV-visible spectra for nitroarylated Cys/Dap model peptides (continued)**

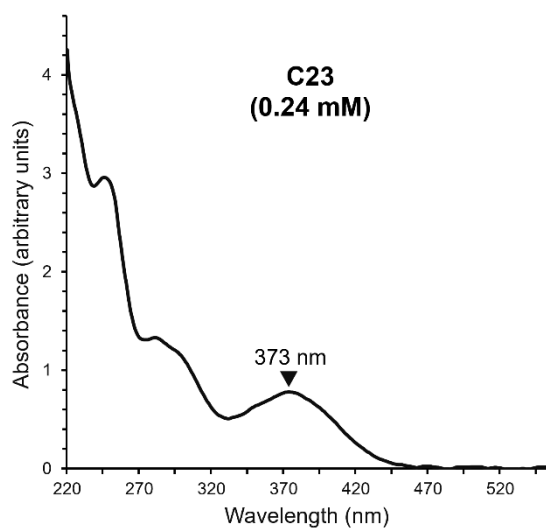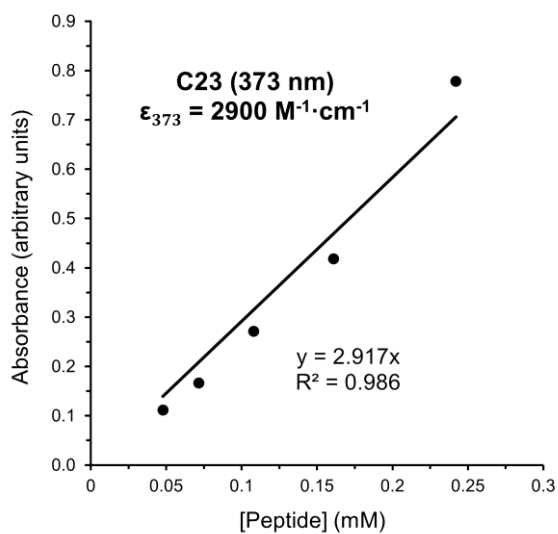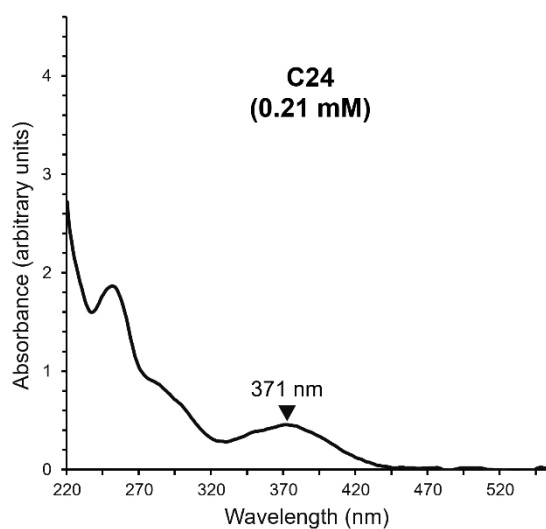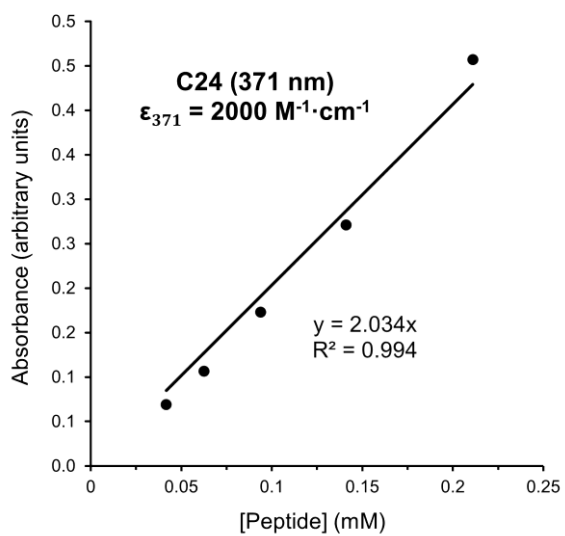

**Figure S2. UV-visible spectra for nitroarylated Cys/Dap model peptides (continued)**

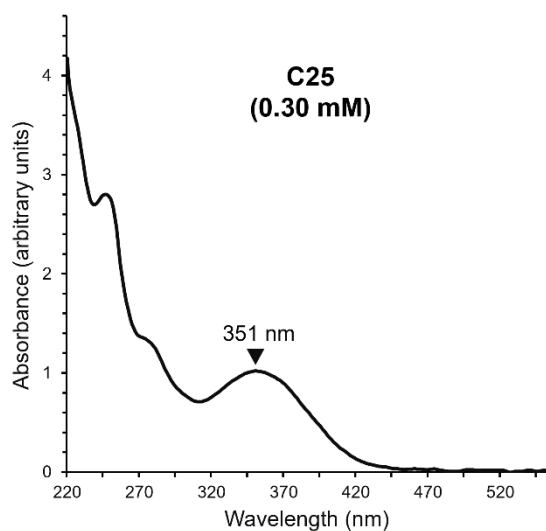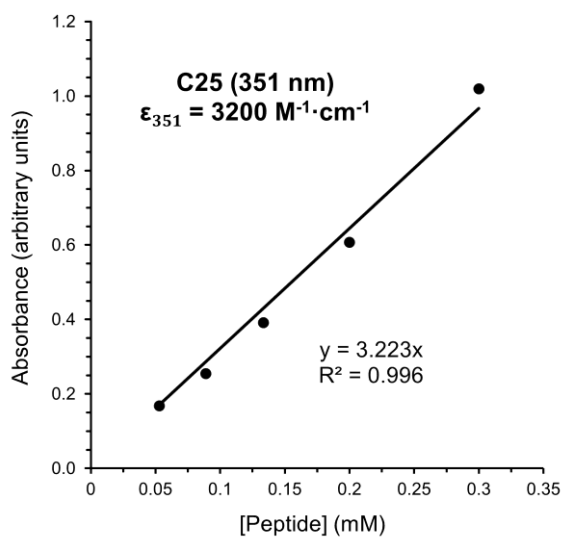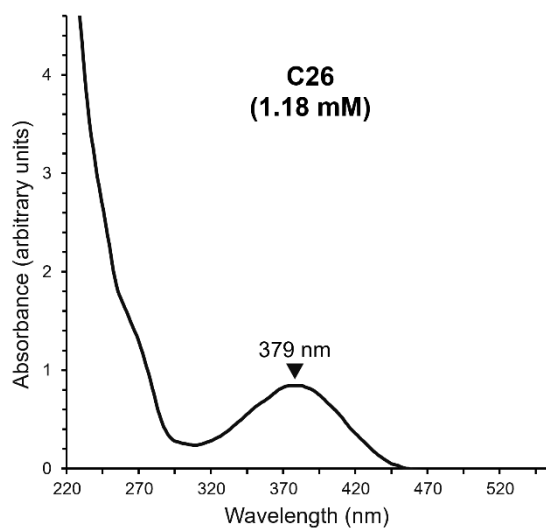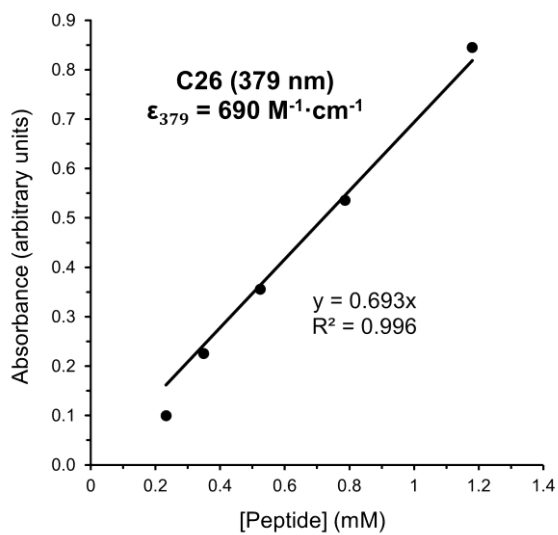

**Figure S2. UV-visible spectra for nitroarylated Cys/Dap model peptides (continued)**

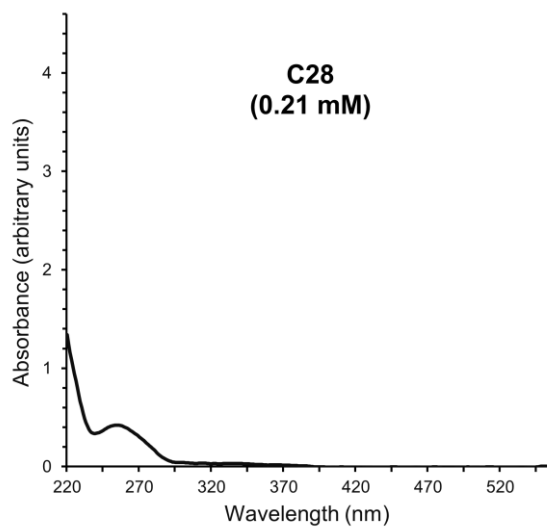

No local maximum > 300 nm

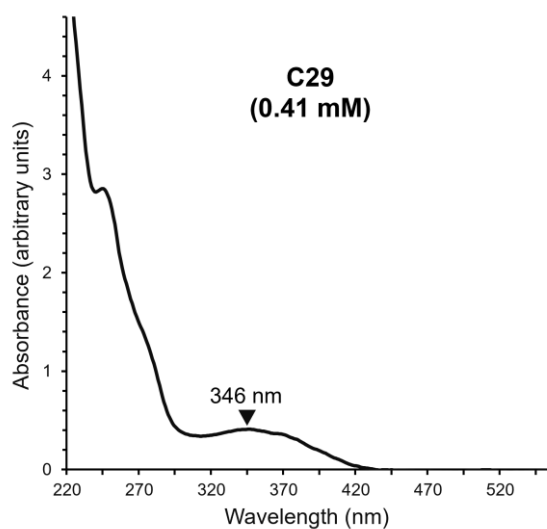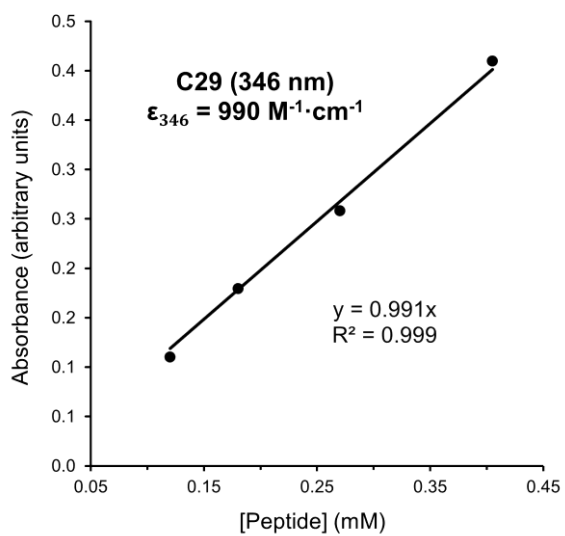

**Figure S2. UV-visible spectra for nitroarylated Cys/Dap model peptides (continued)**

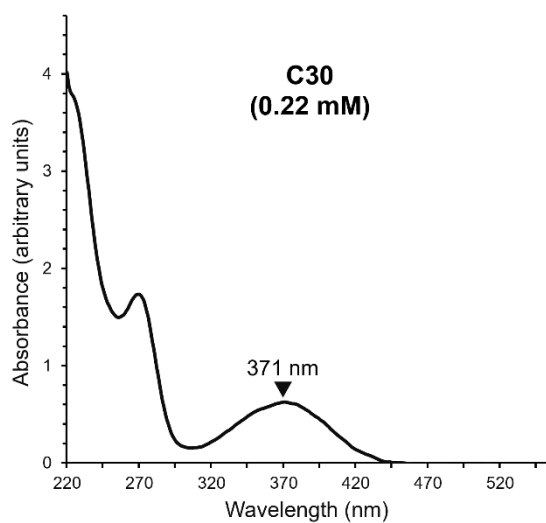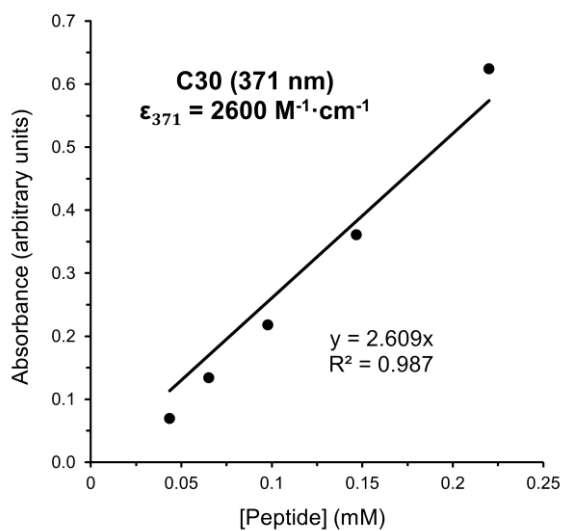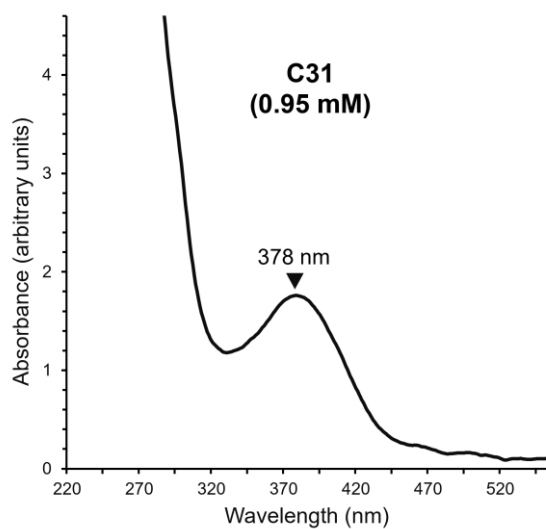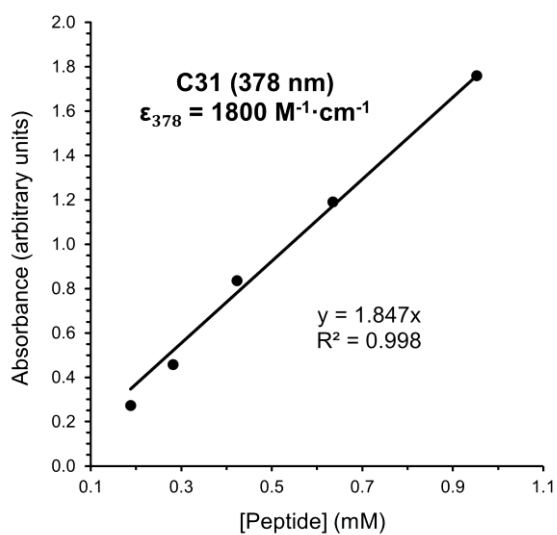

**Figure S2. UV-visible spectra for nitroarylated Cys/Dap model peptides (continued)**

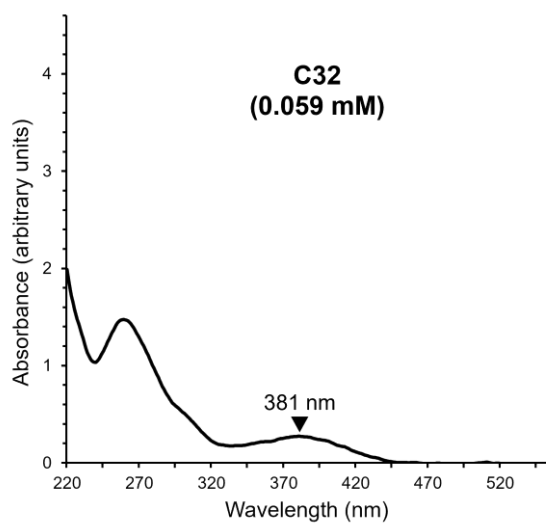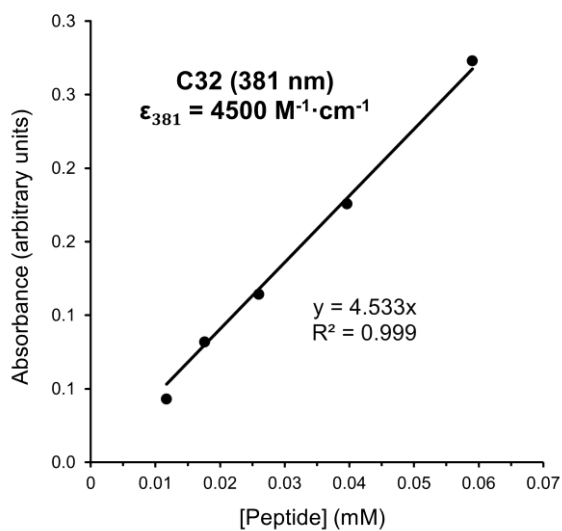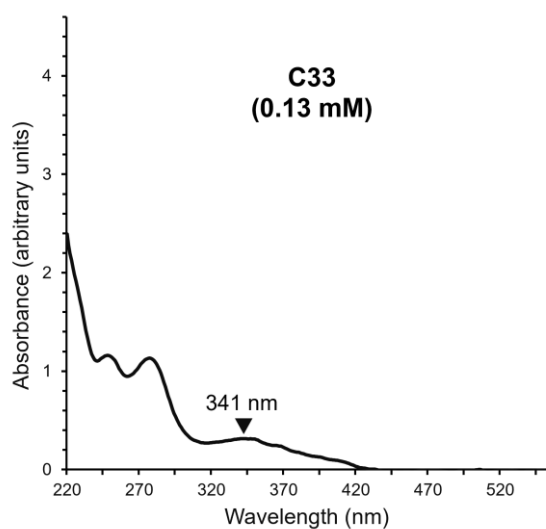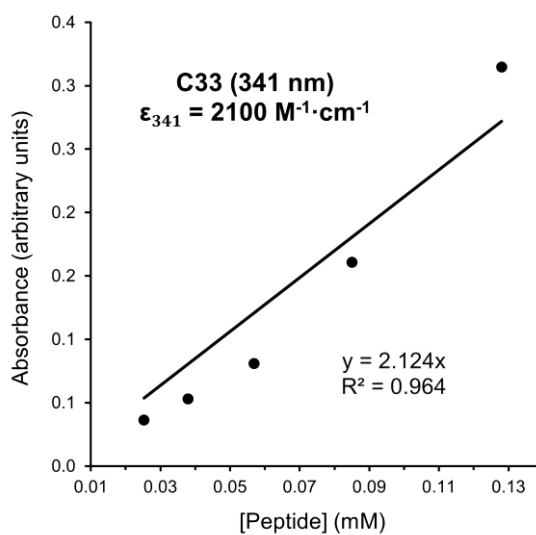

**Figure S2. UV-visible spectra for nitroarylated Cys/Dap model peptides (continued)**

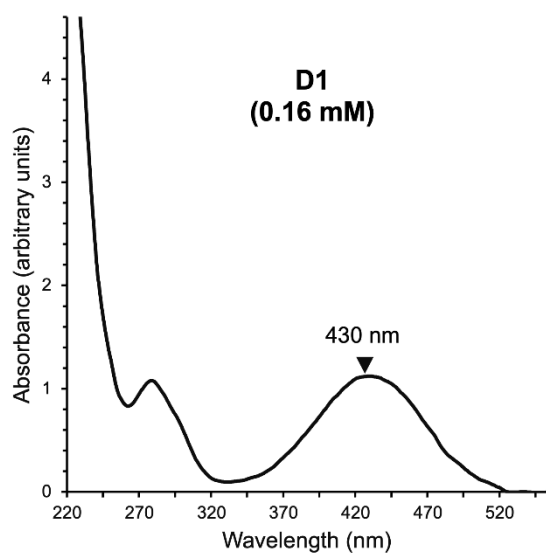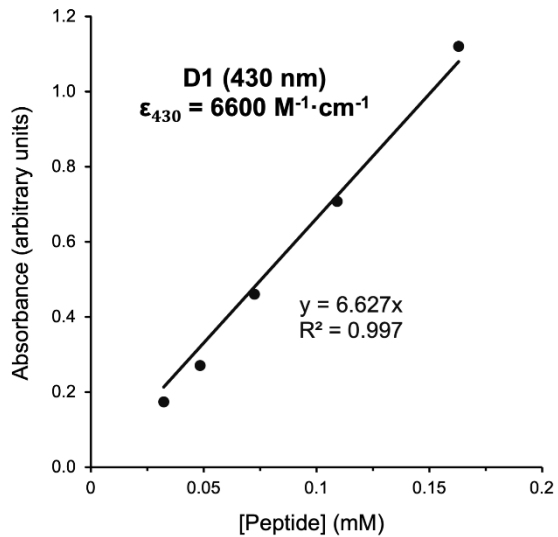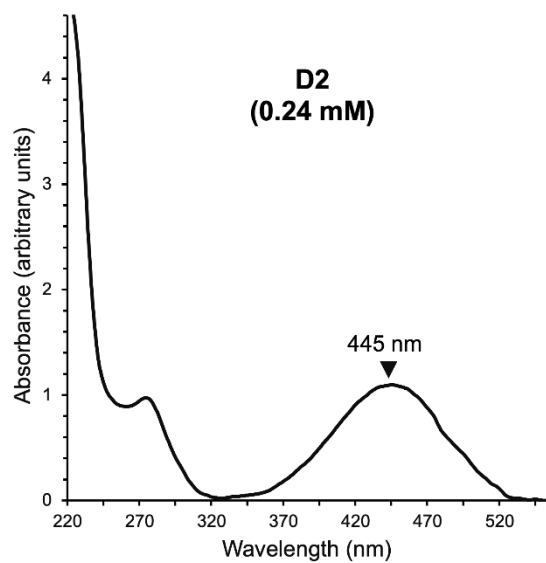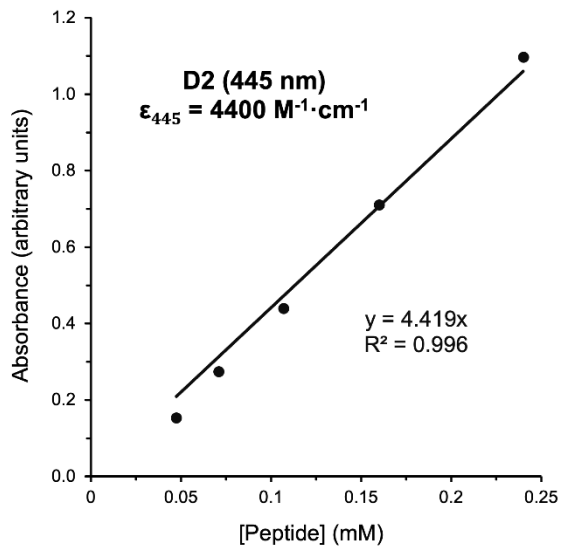

**Figure S2. UV-visible spectra for nitroarylated Cys/Dap model peptides (continued)**

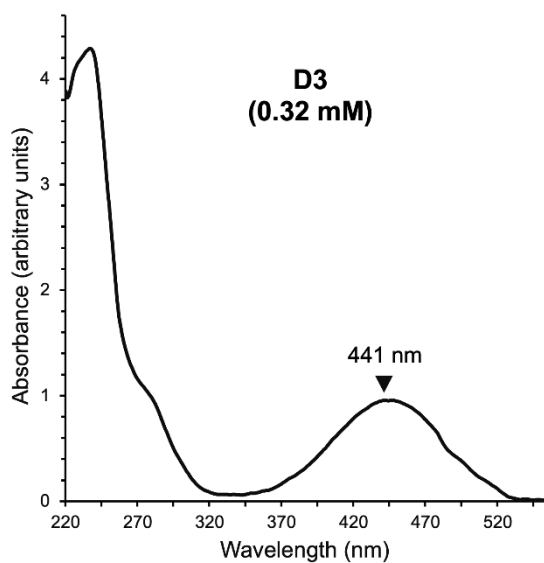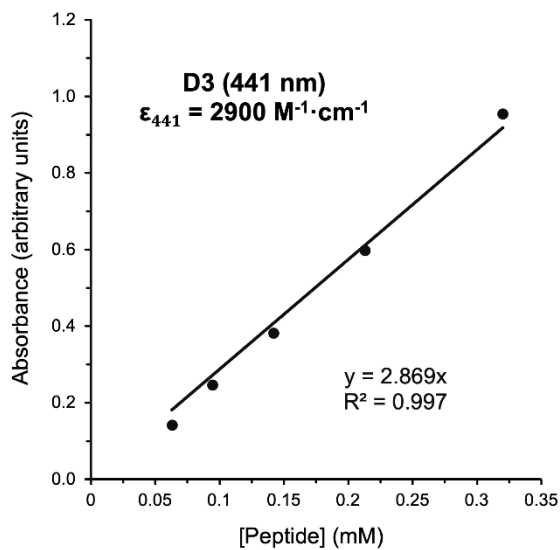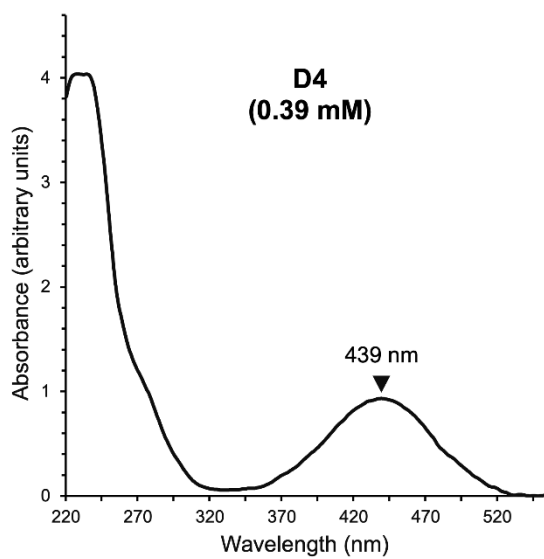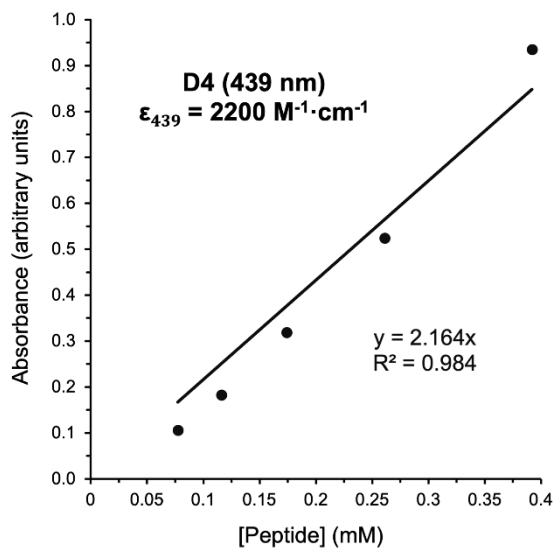

**Figure S2. UV-visible spectra for nitroarylated Cys/Dap model peptides (continued)**

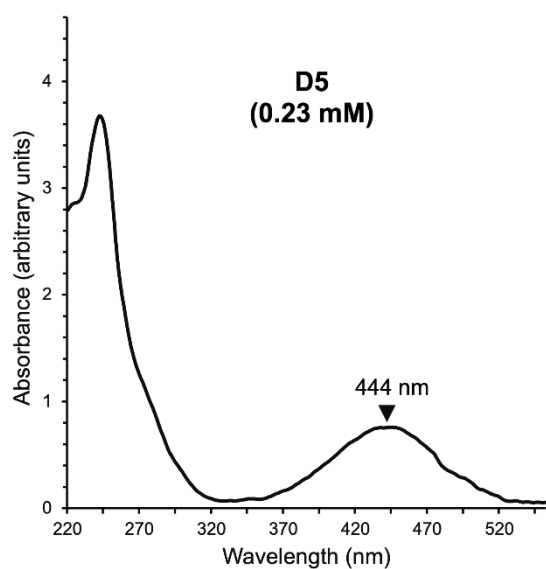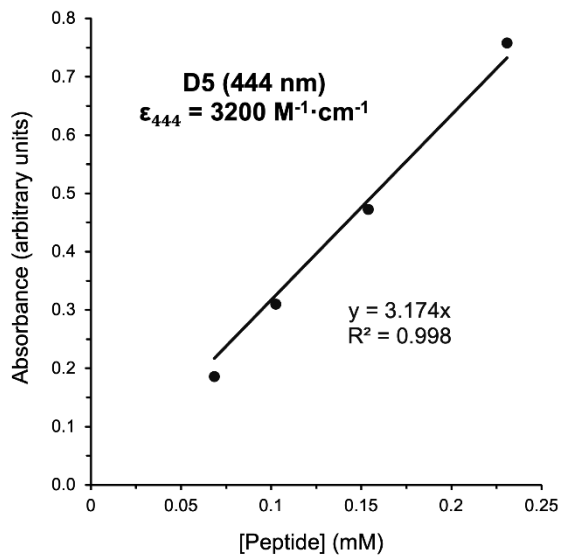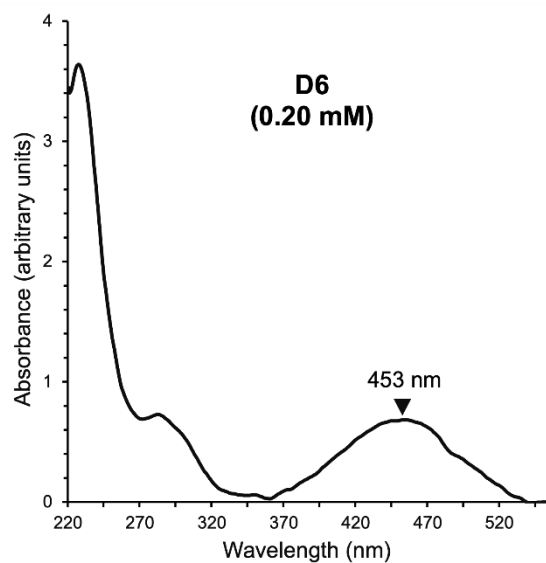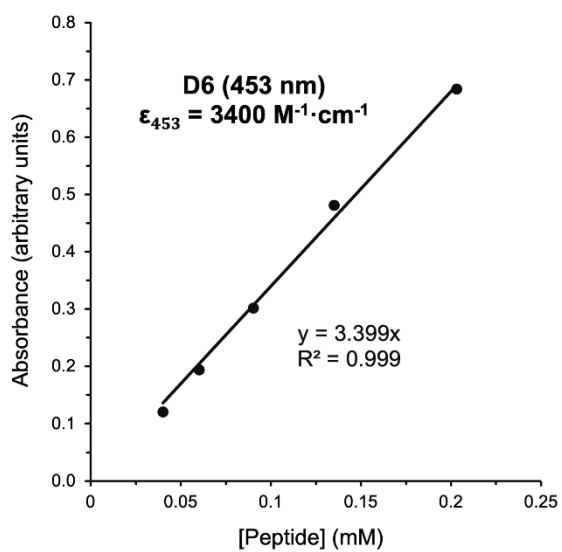

**Figure S2. UV-visible spectra for nitroarylated Cys/Dap model peptides (continued)**

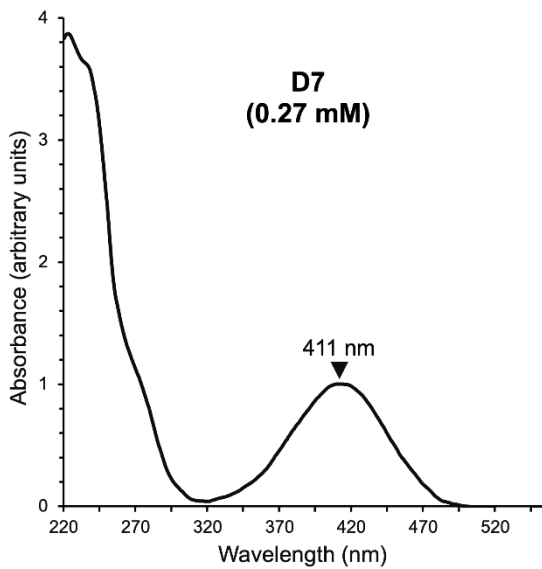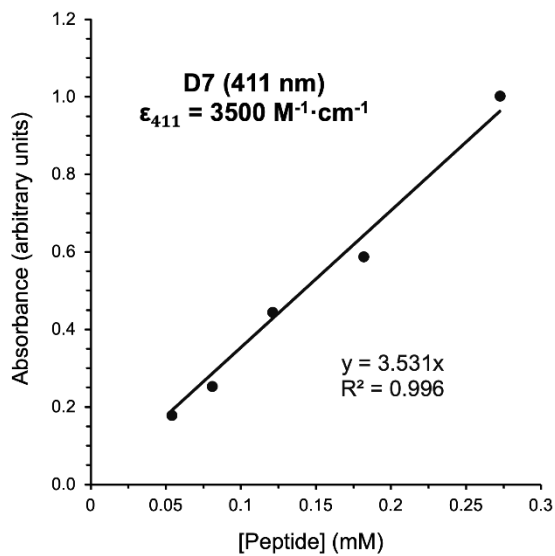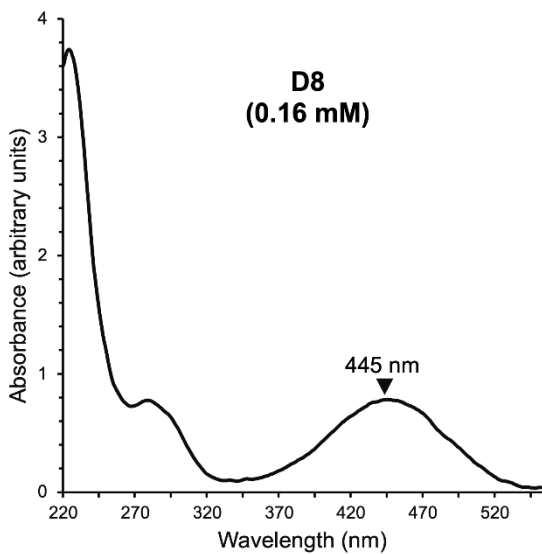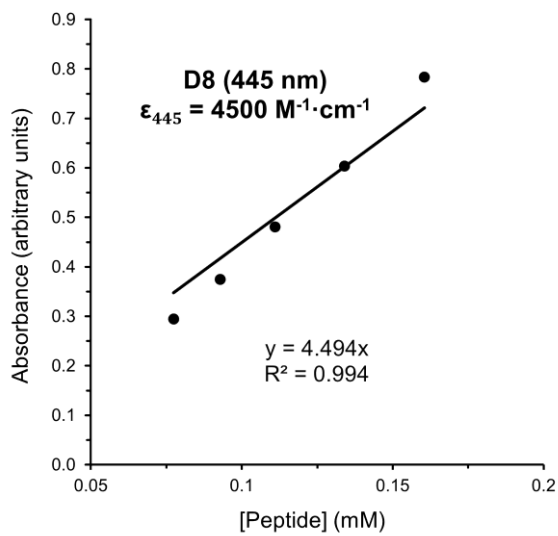

**Figure S2. UV-visible spectra for nitroarylated Cys/Dap model peptides (continued)**

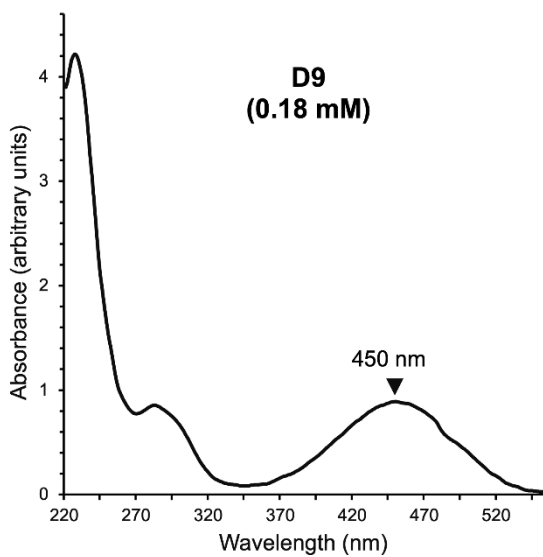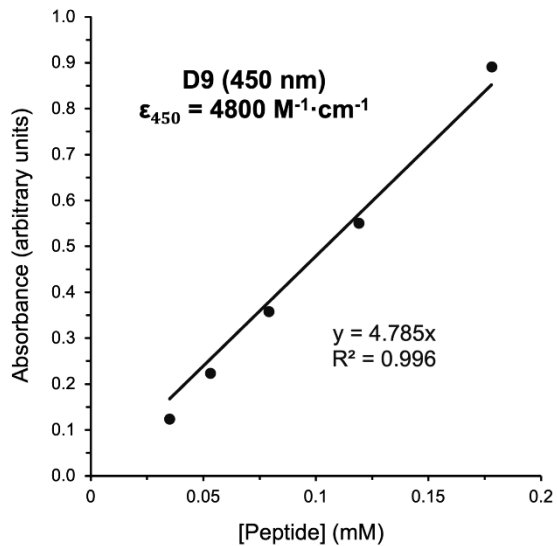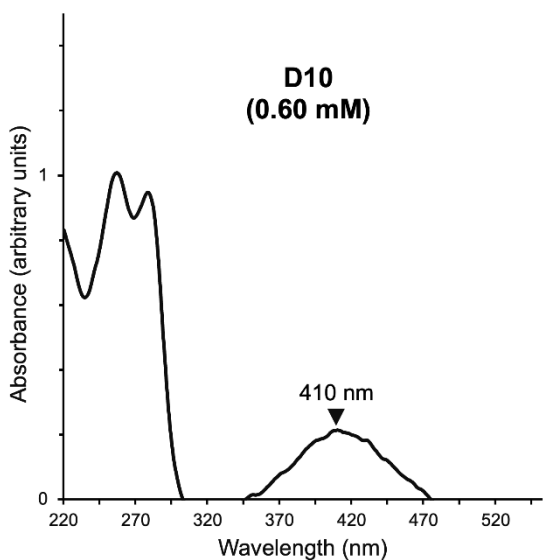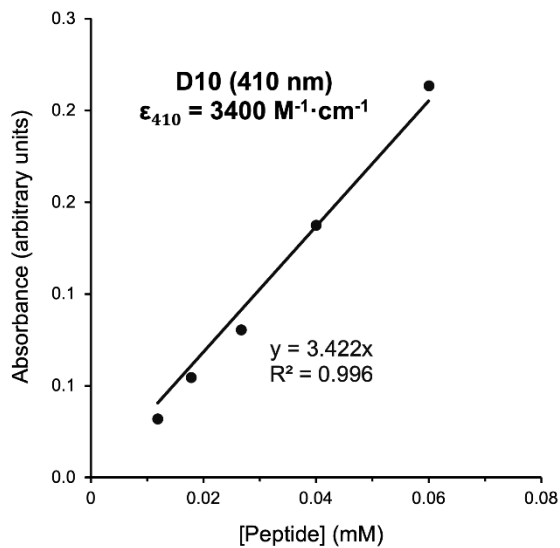

**Figure S2. UV-visible spectra for nitroarylated Cys/Dap model peptides (continued)**

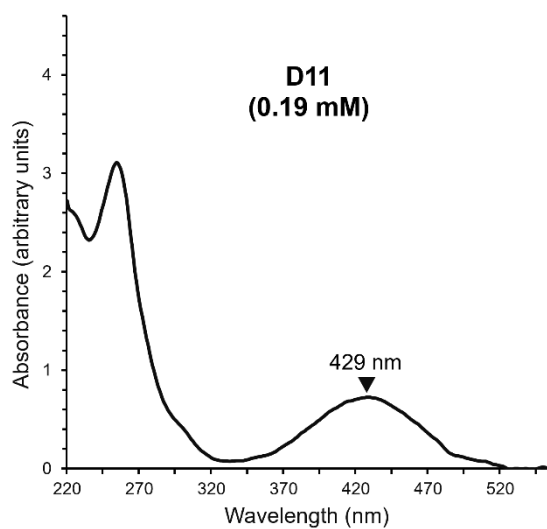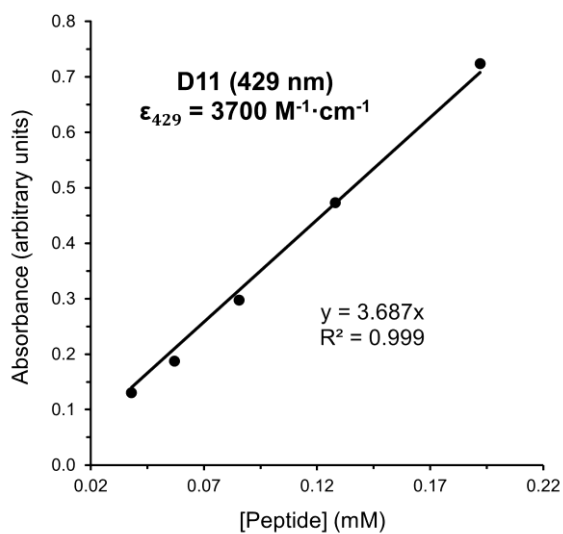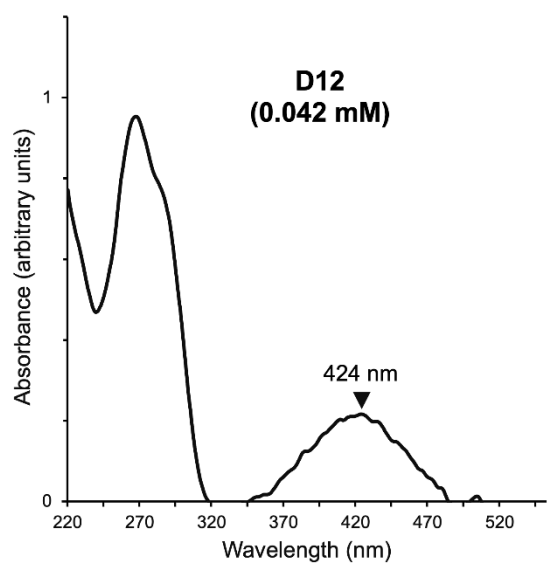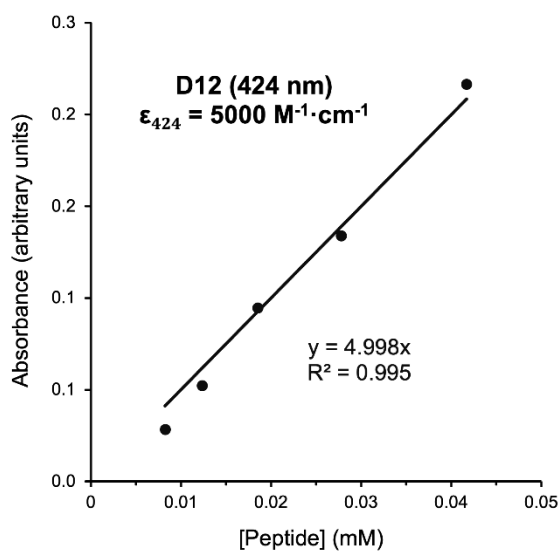

**Figure S2. UV-visible spectra for nitroarylated Cys/Dap model peptides (continued)**

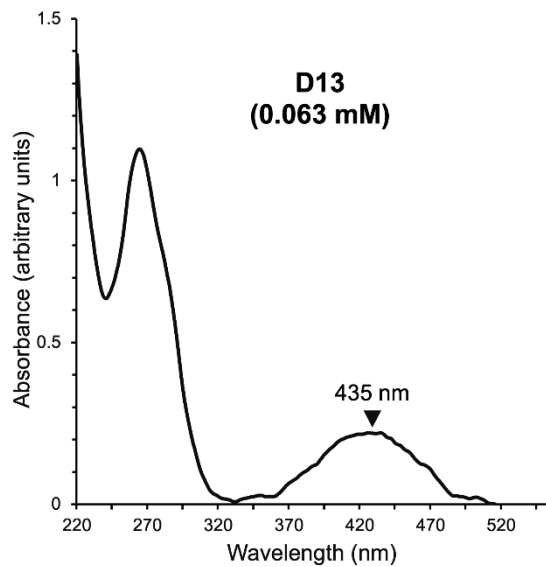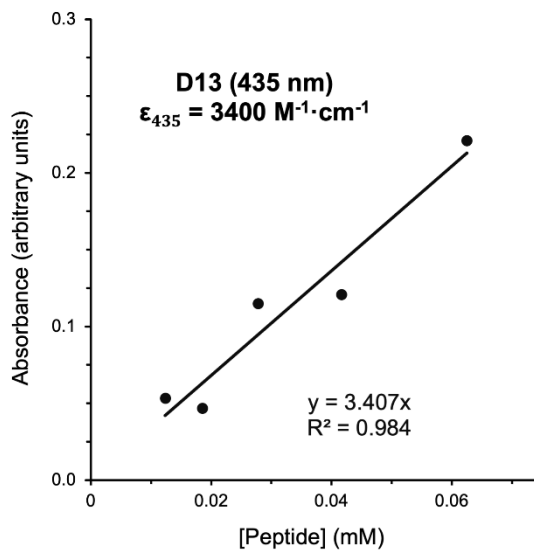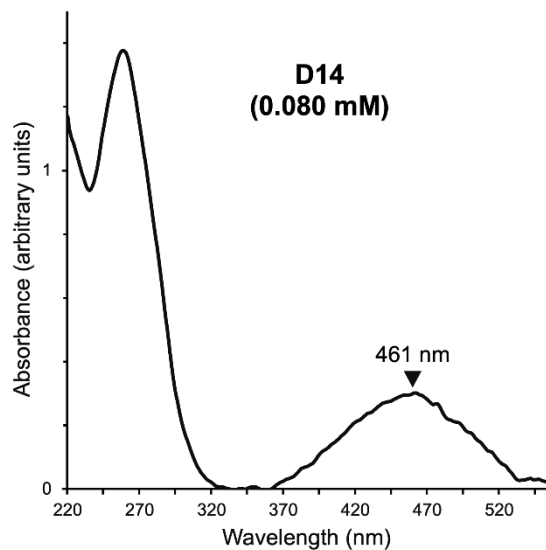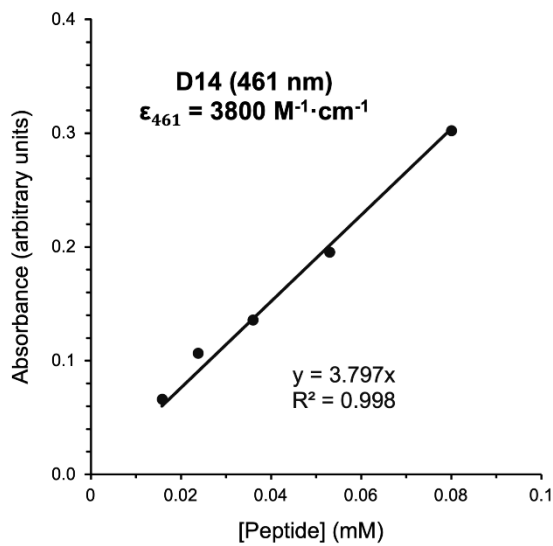

**Figure S2. UV-visible spectra for nitroarylated Cys/Dap model peptides (continued)**

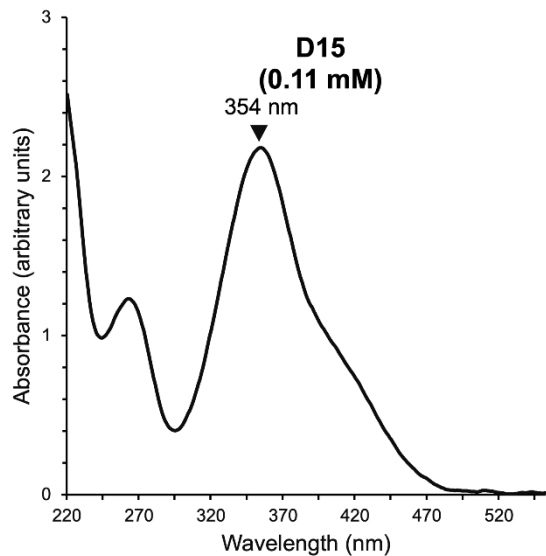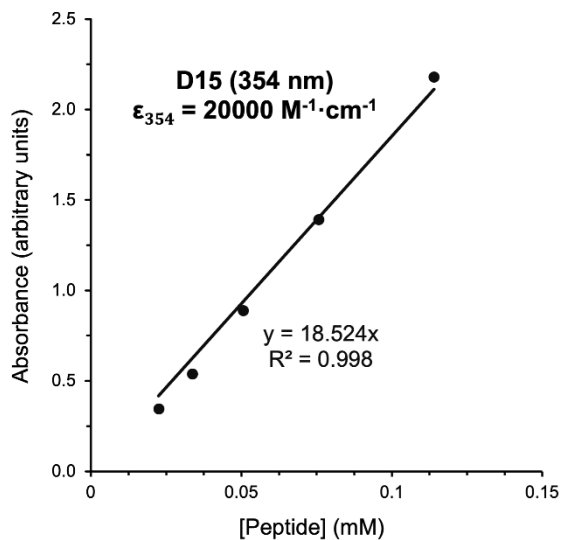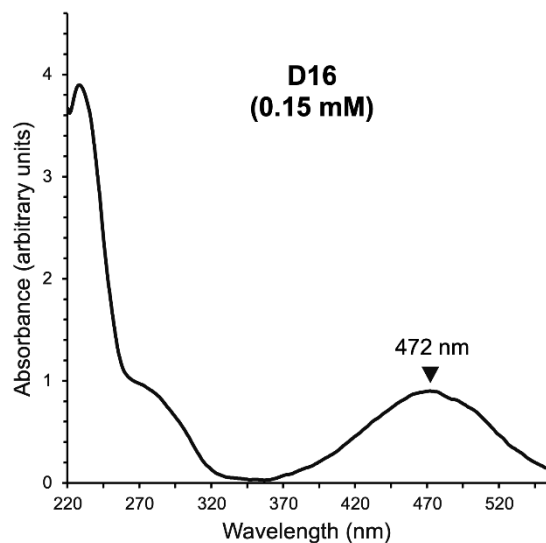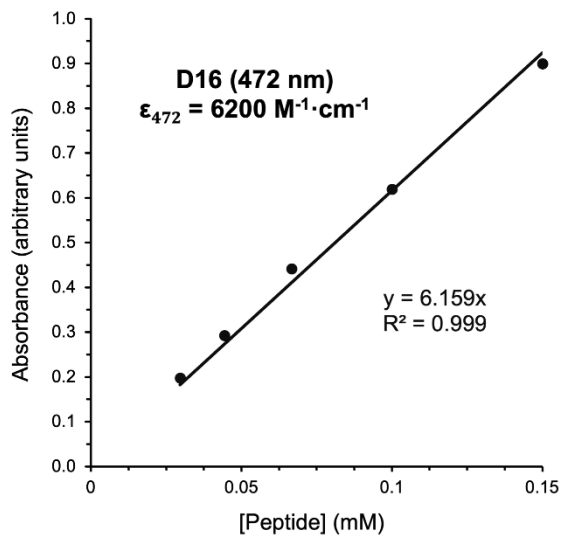

**Figure S2. UV-visible spectra for nitroarylated Cys/Dap model peptides (continued)**

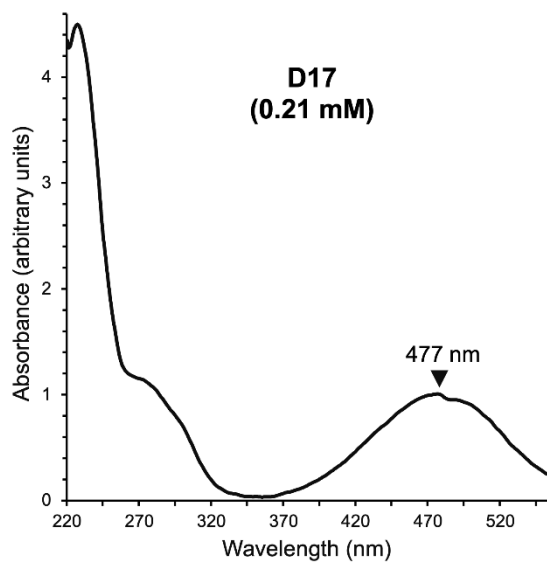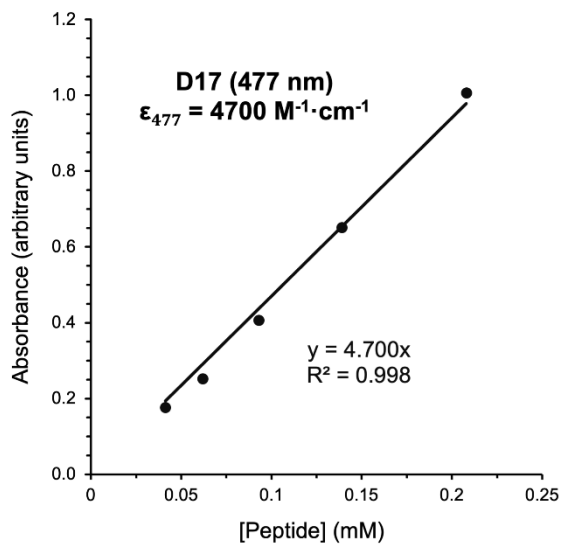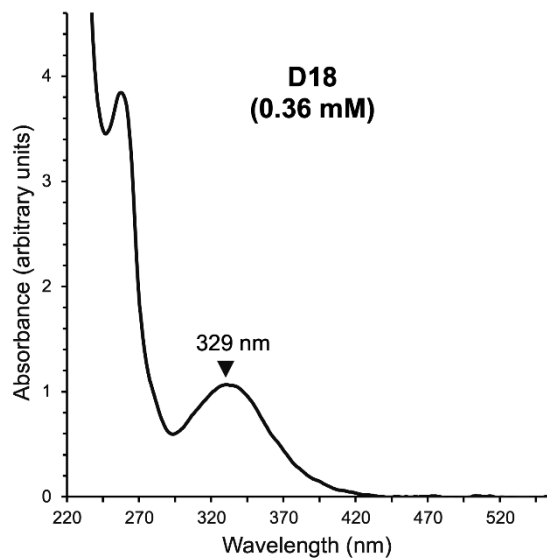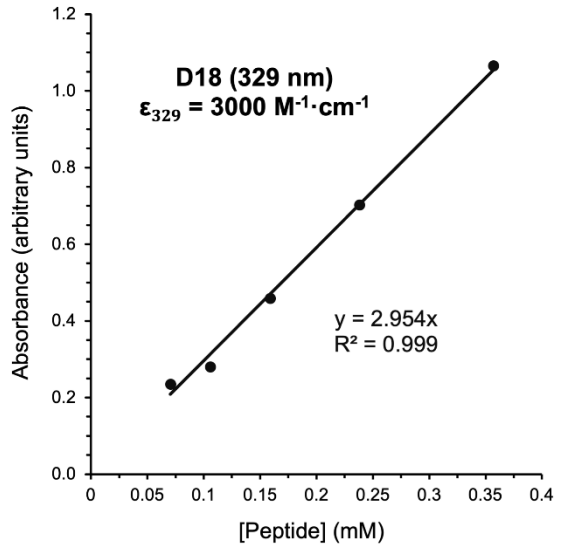

**Figure S2. UV-visible spectra for nitroarylated Cys/Dap model peptides (continued)**

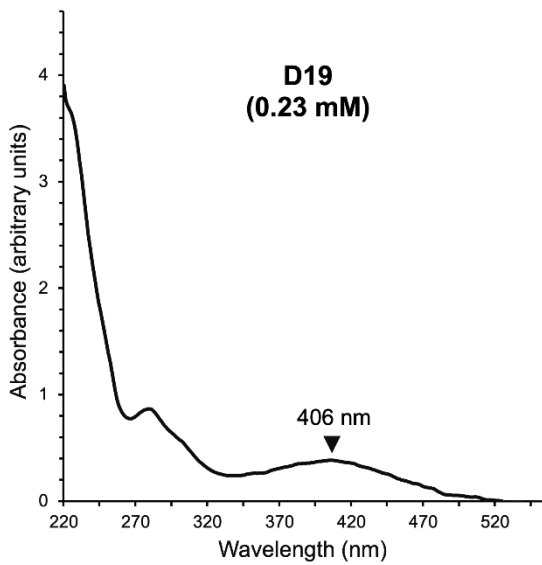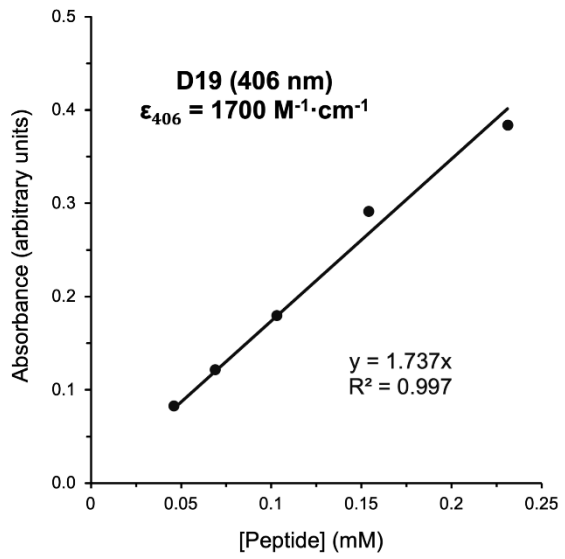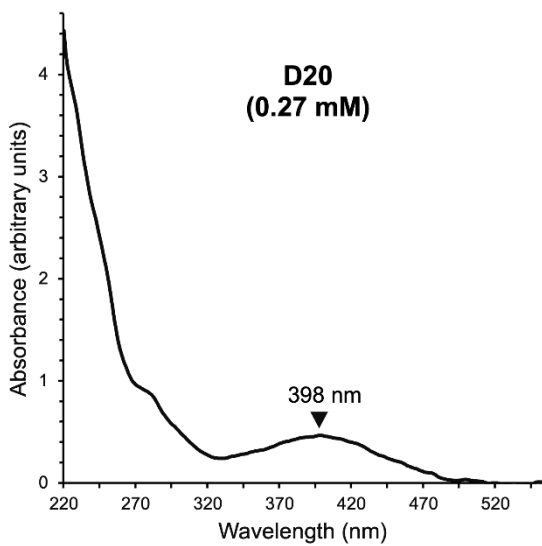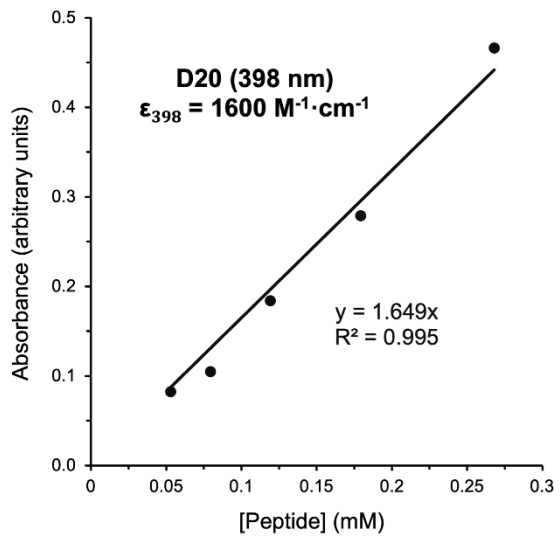

**Figure S2. UV-visible spectra for nitroarylated Cys/Dap model peptides (continued)**

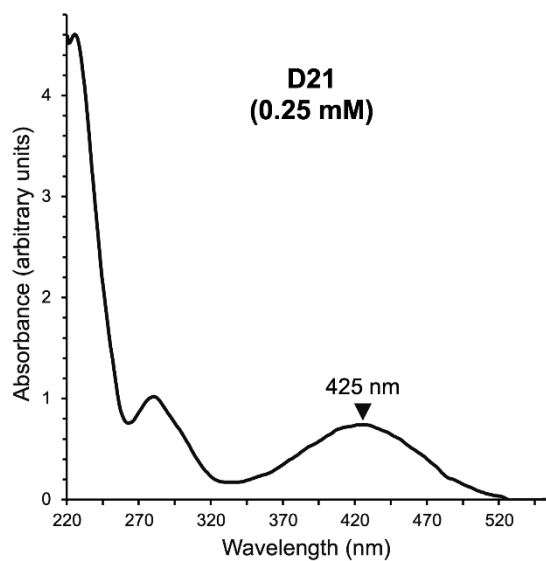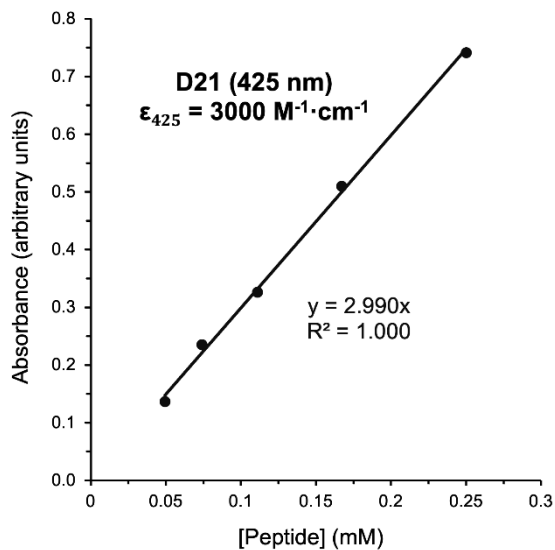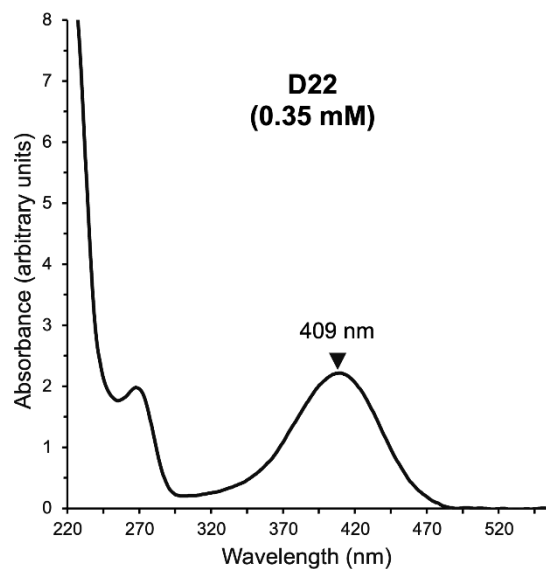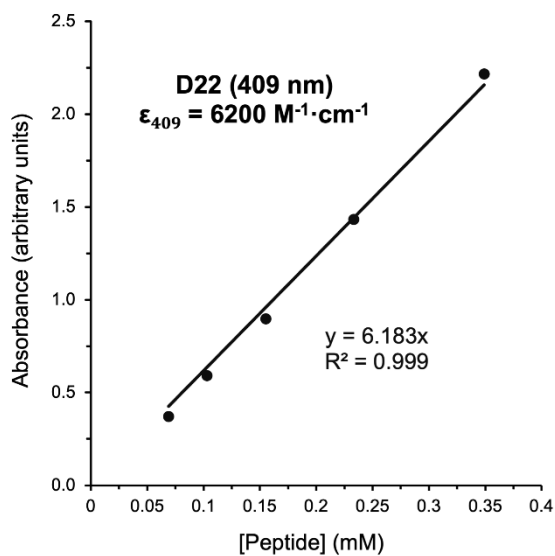

**Figure S2. UV-visible spectra for nitroarylated Cys/Dap model peptides (continued)**

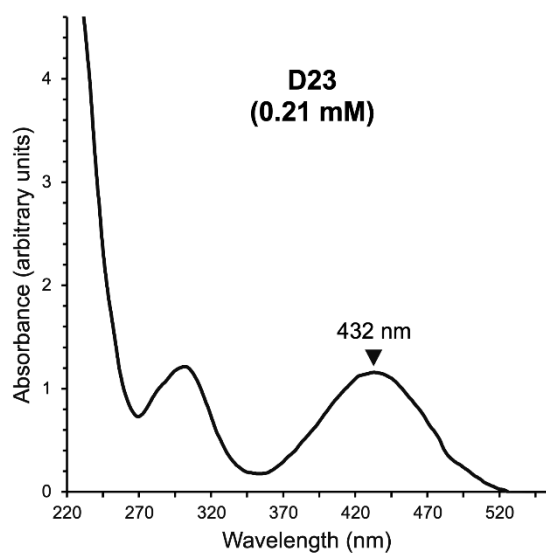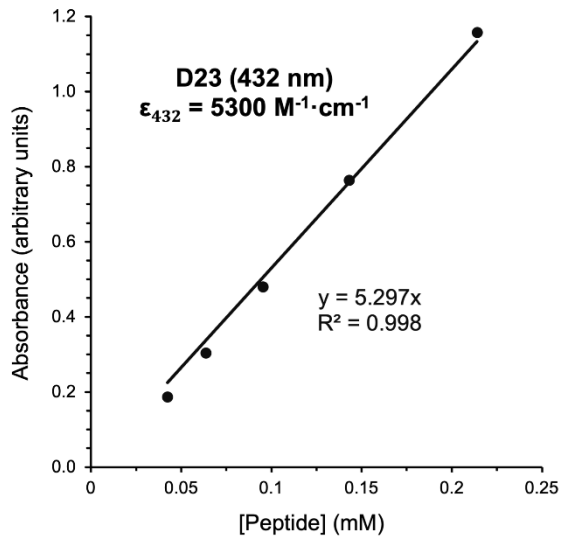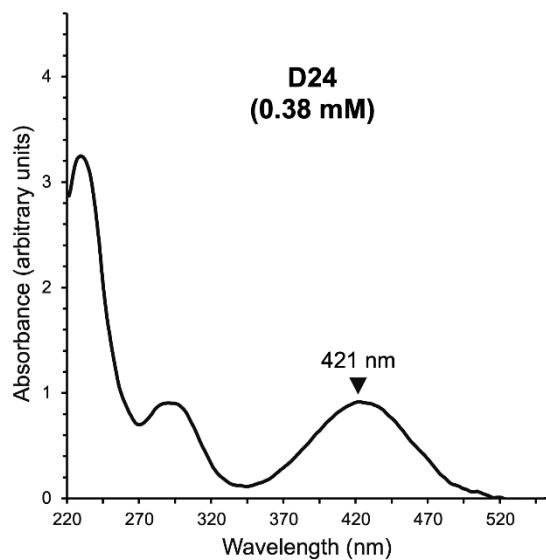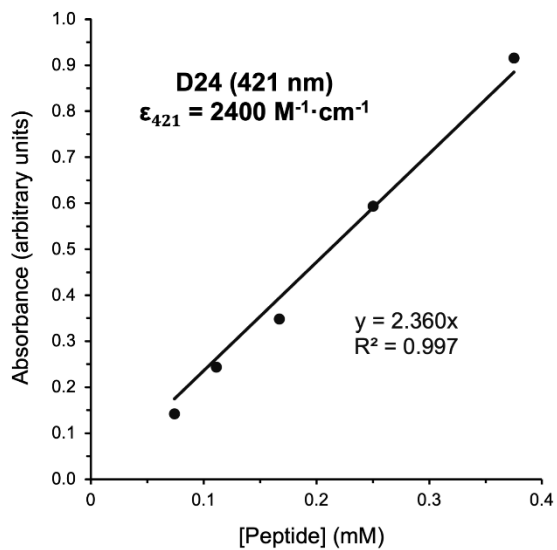

**Figure S2. UV-visible spectra for nitroarylated Cys/Dap model peptides (continued)**

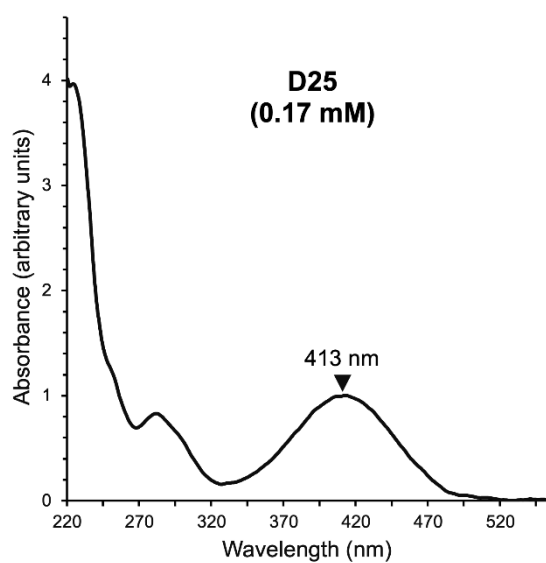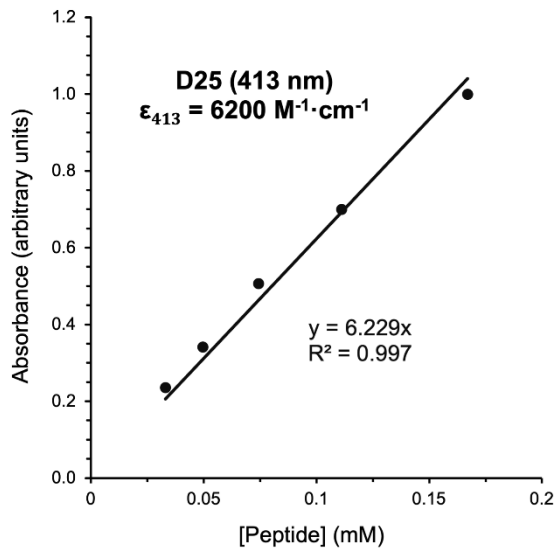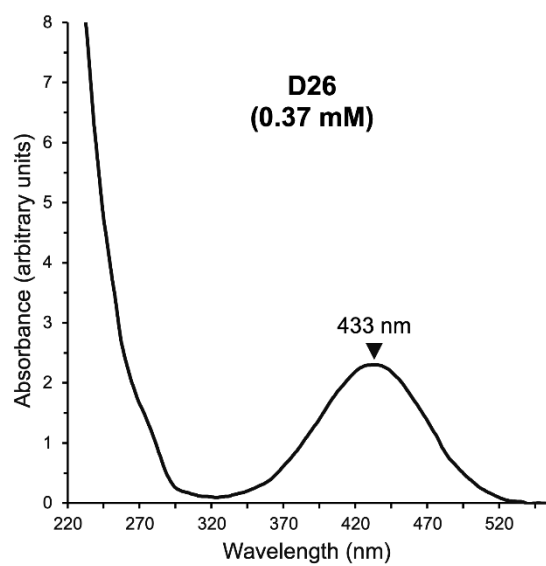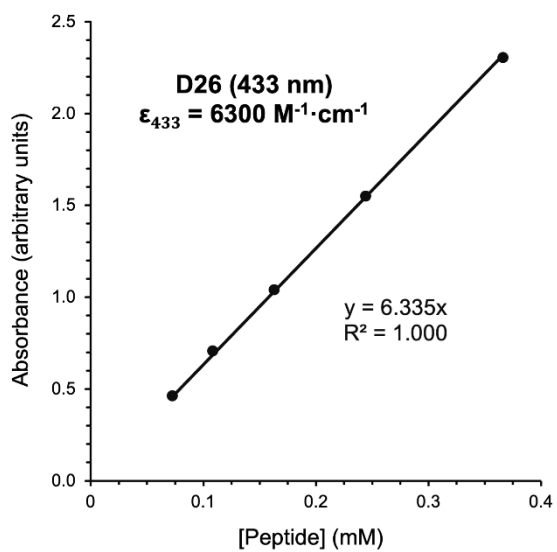

**Figure S2. UV-visible spectra for nitroarylated Cys/Dap model peptides (continued)**

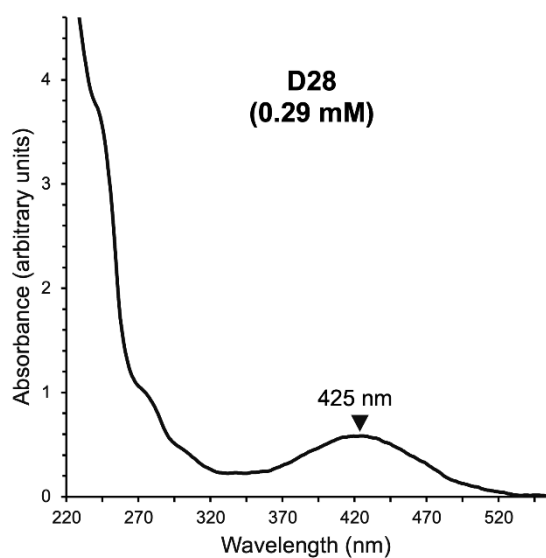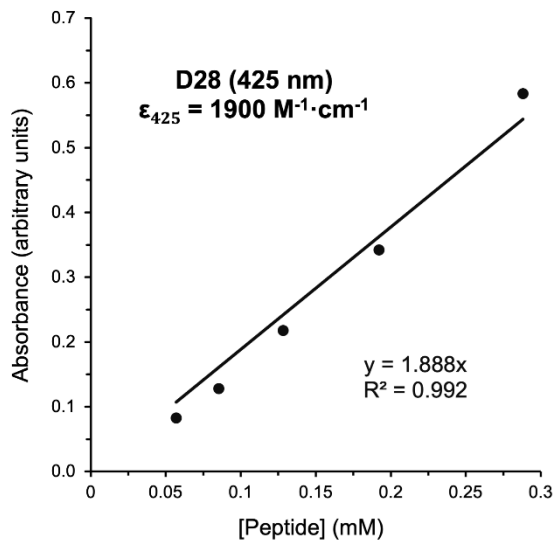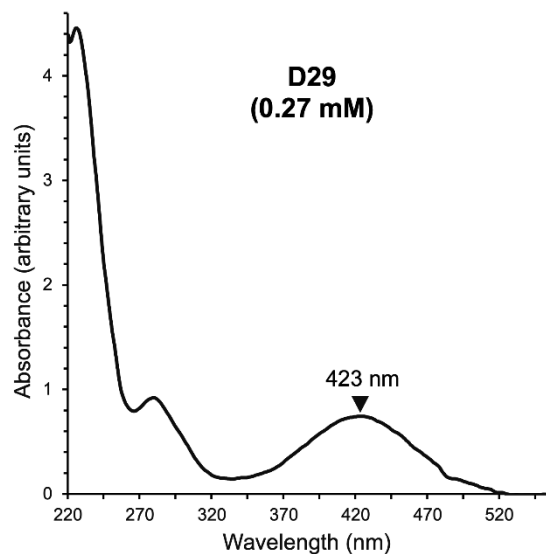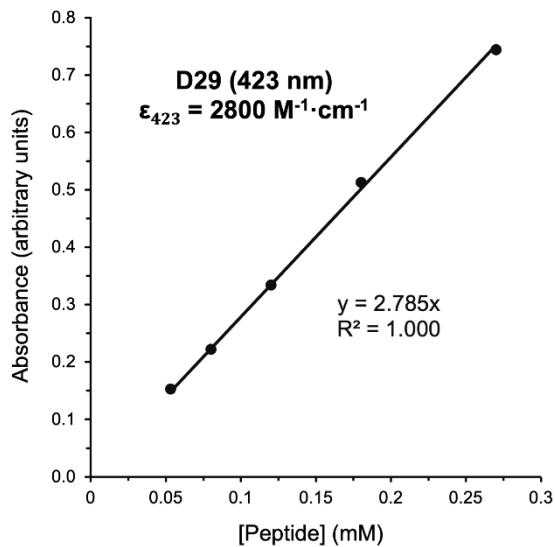

**Figure S2. UV-visible spectra for nitroarylated Cys/Dap model peptides (continued)**

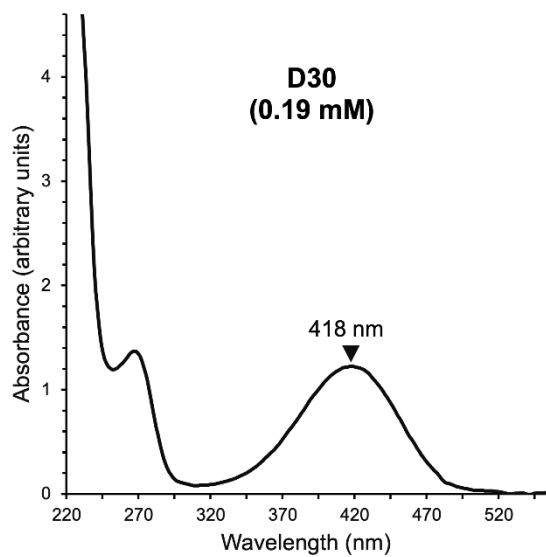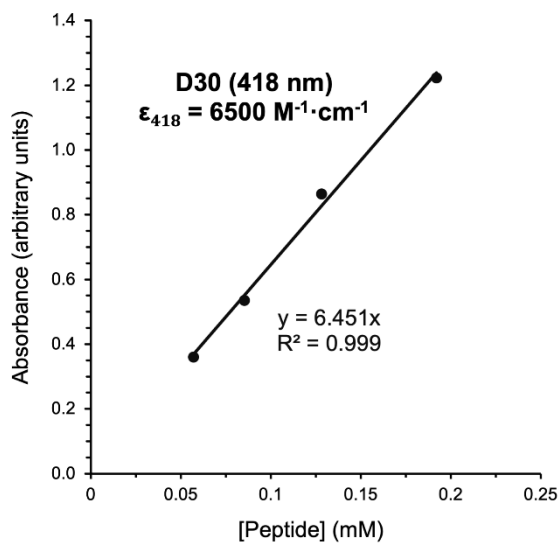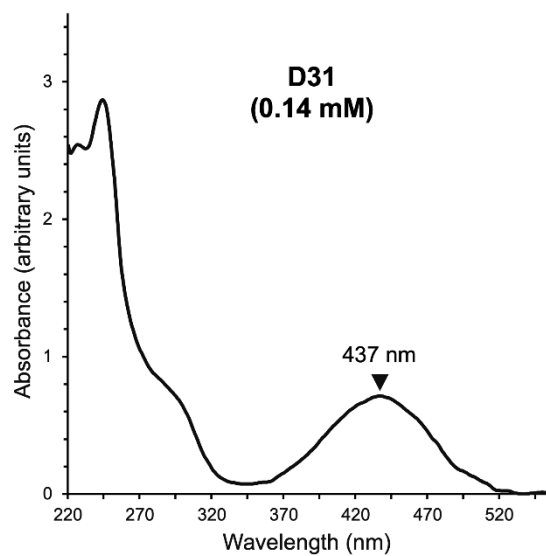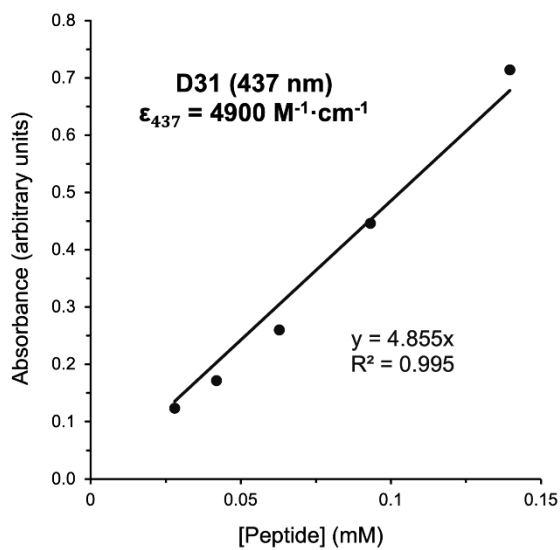

**Figure S2. UV-visible spectra for nitroarylated Cys/Dap model peptides (continued)**

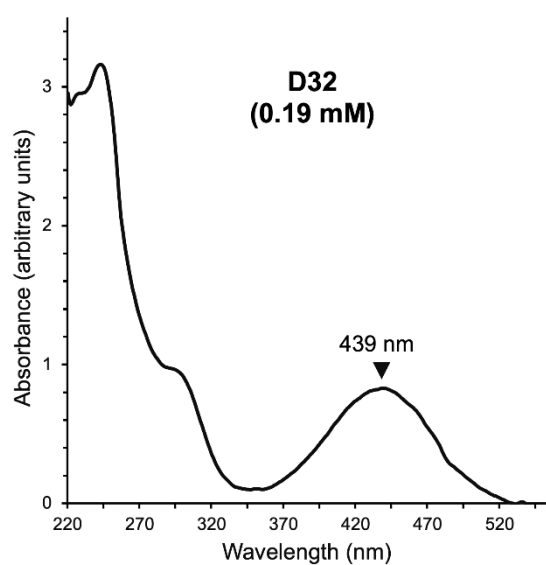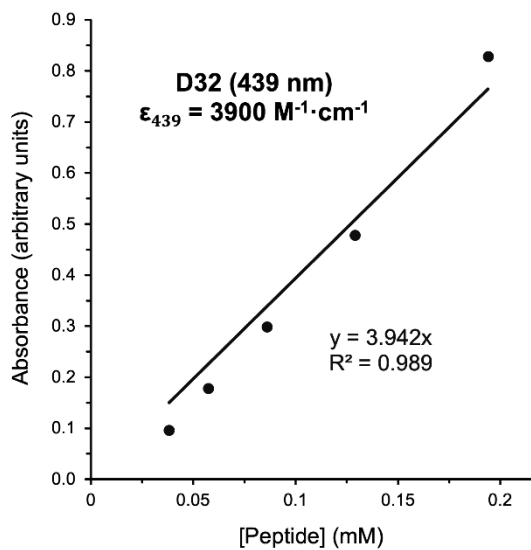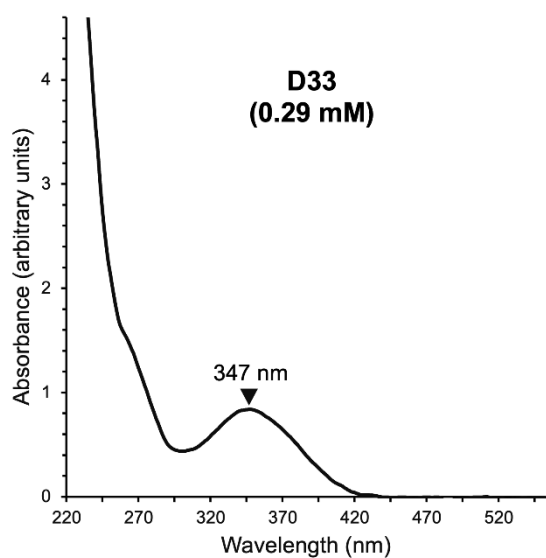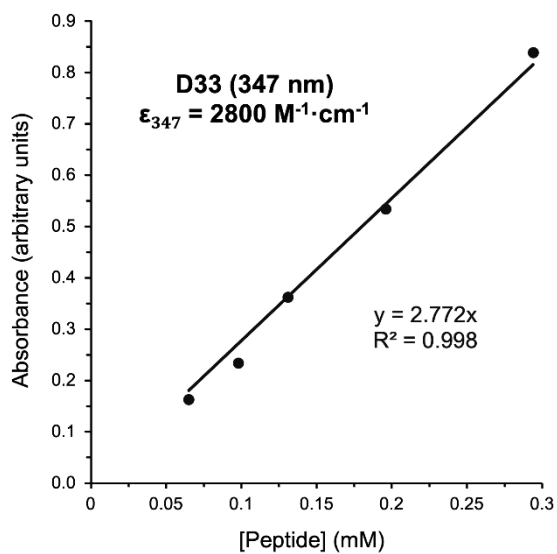

**Figure S2. UV-visible spectra for nitroarylated Cys/Dap model peptides (continued)**

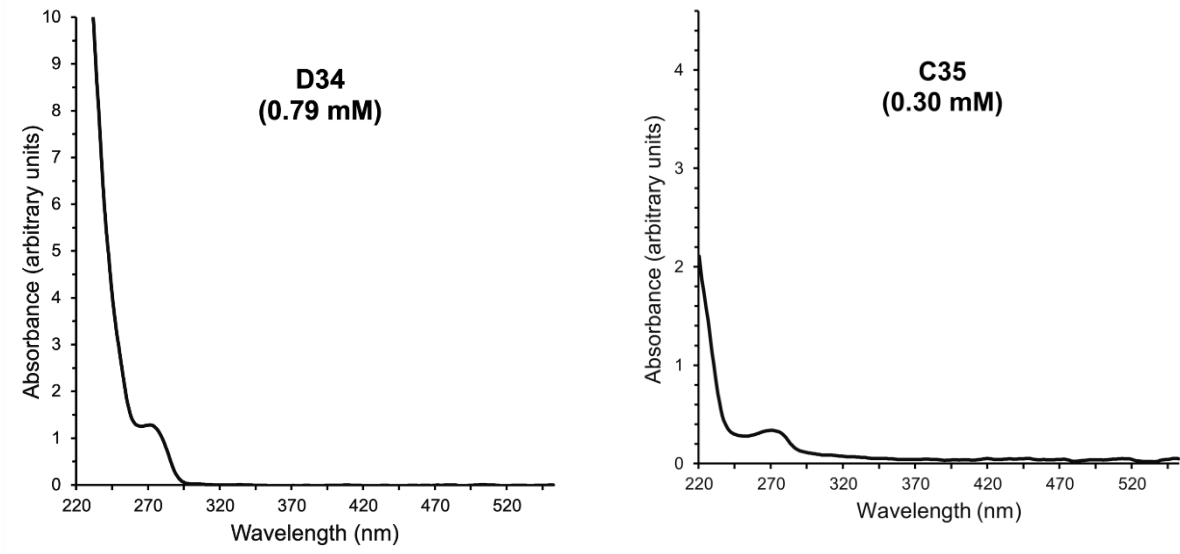

**Figure S2. UV-visible spectra for nitroarylated Cys/Dap model peptides (continued)**

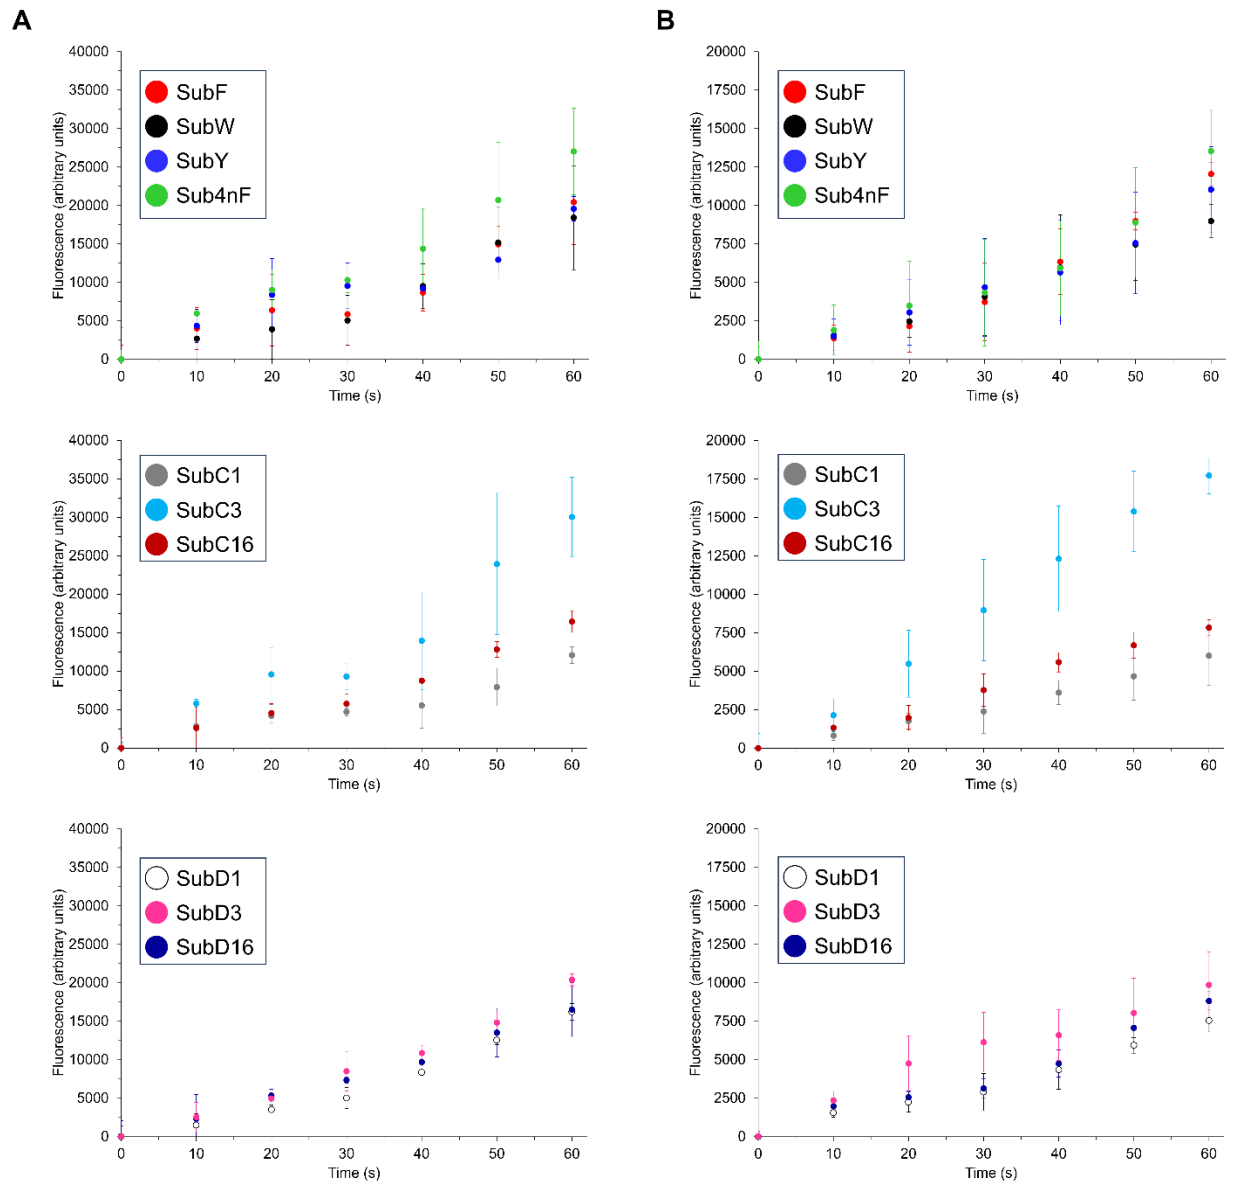

**Figure S3. Plasmin assay data with model substrates.** Fluorescence was monitored every 10 s for 1 min for samples containing 4.5  $\mu\text{M}$  substrate (A) and 2.25  $\mu\text{M}$  substrate (B) using 380 nm and 450 nm as the excitation and emission wavelengths, respectively. All substrates follow the sequence motif Ac-KQ $\Phi$ K-ACC-NH<sub>2</sub>, where Ac = acetyl, NH<sub>2</sub> = amidated C-terminus, and ACC = 7-amino-4-carbamoylmethylcoumarin. The  $\Phi$  residue for each substrate is as follows: SubF = phenylalanine, SubW = tryptophan, SubY = tyrosine, Sub4nF = 4-nitrophenylalanine, SubC1 = cysteine + **A1**, SubC3 = cysteine + **A3**, SubC16 = cysteine + **A16**, SubD1 = 2,3-diaminopropionic acid (Dap) + **A1**, SubD3 = Dap + **A3**, SubD16 = Dap + **A16** (see Tables S1 and S2 for additional information on **A1**, **A3**, and **A16**).

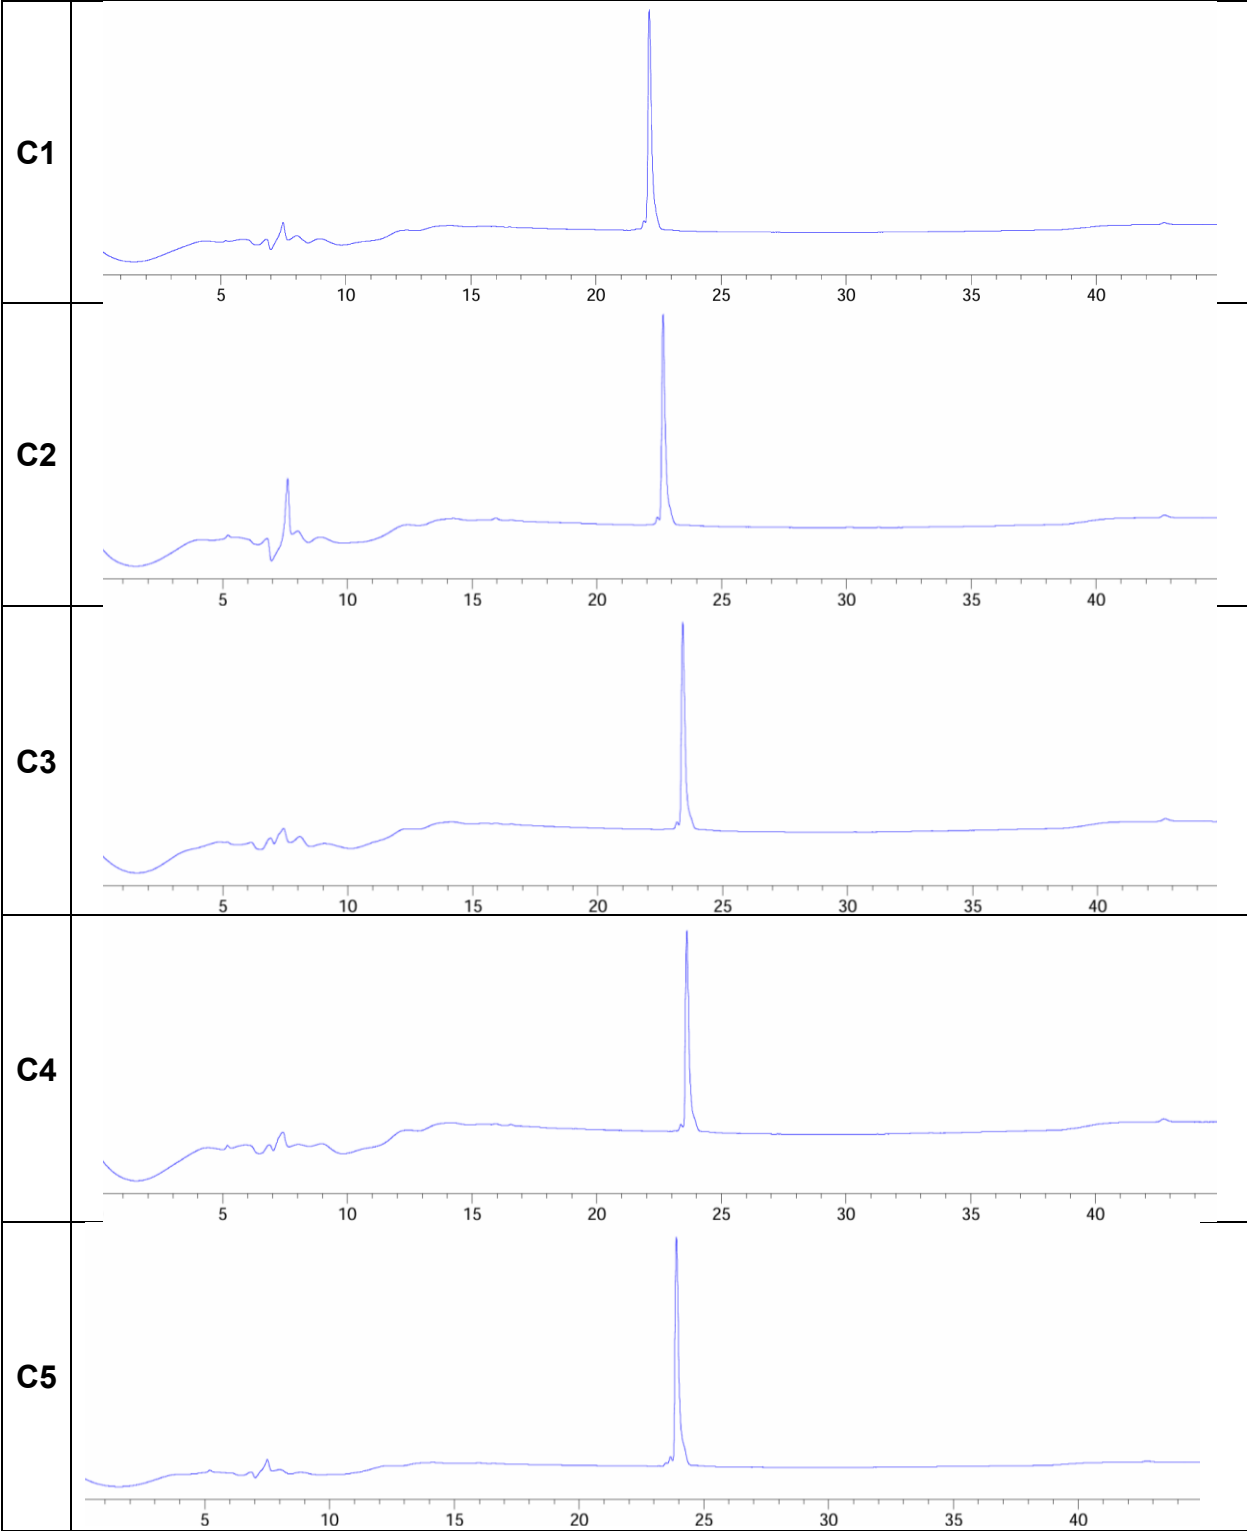

**Figure S4. Analytical HPLC chromatograms for all peptides**

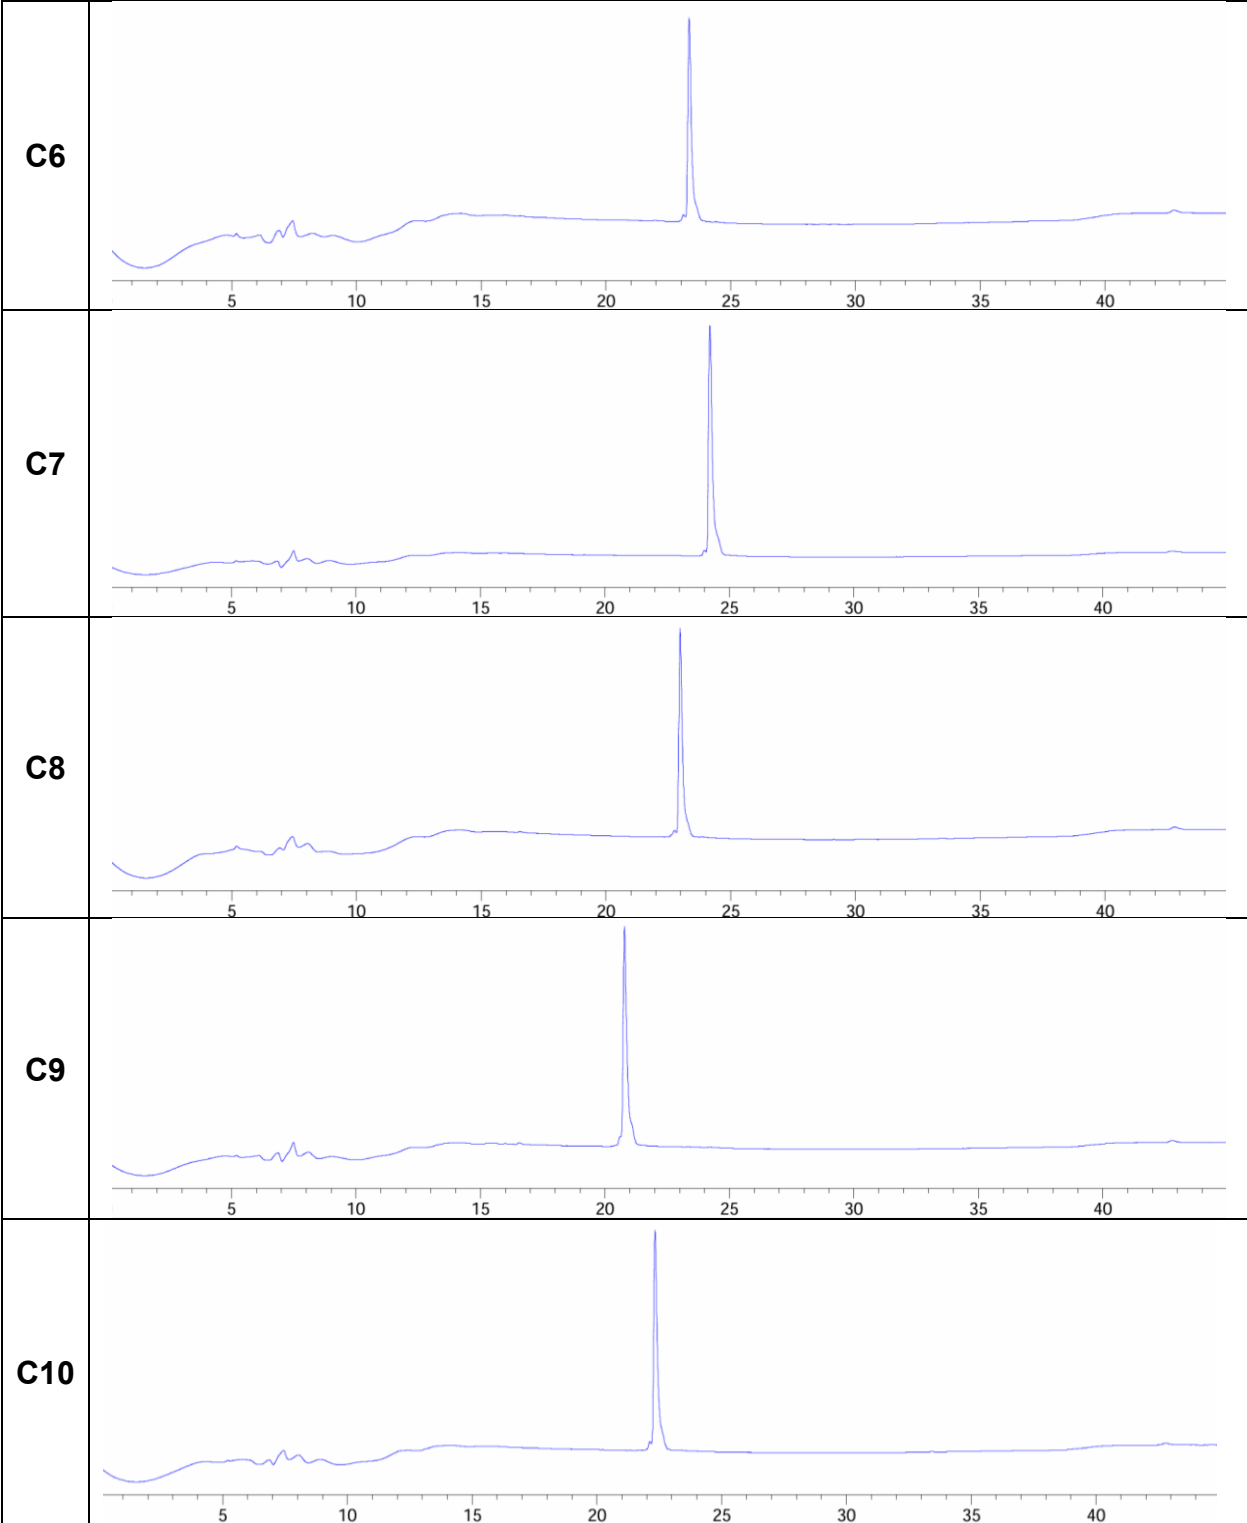

**Figure S4. Analytical HPLC chromatograms for all peptides (continued)**

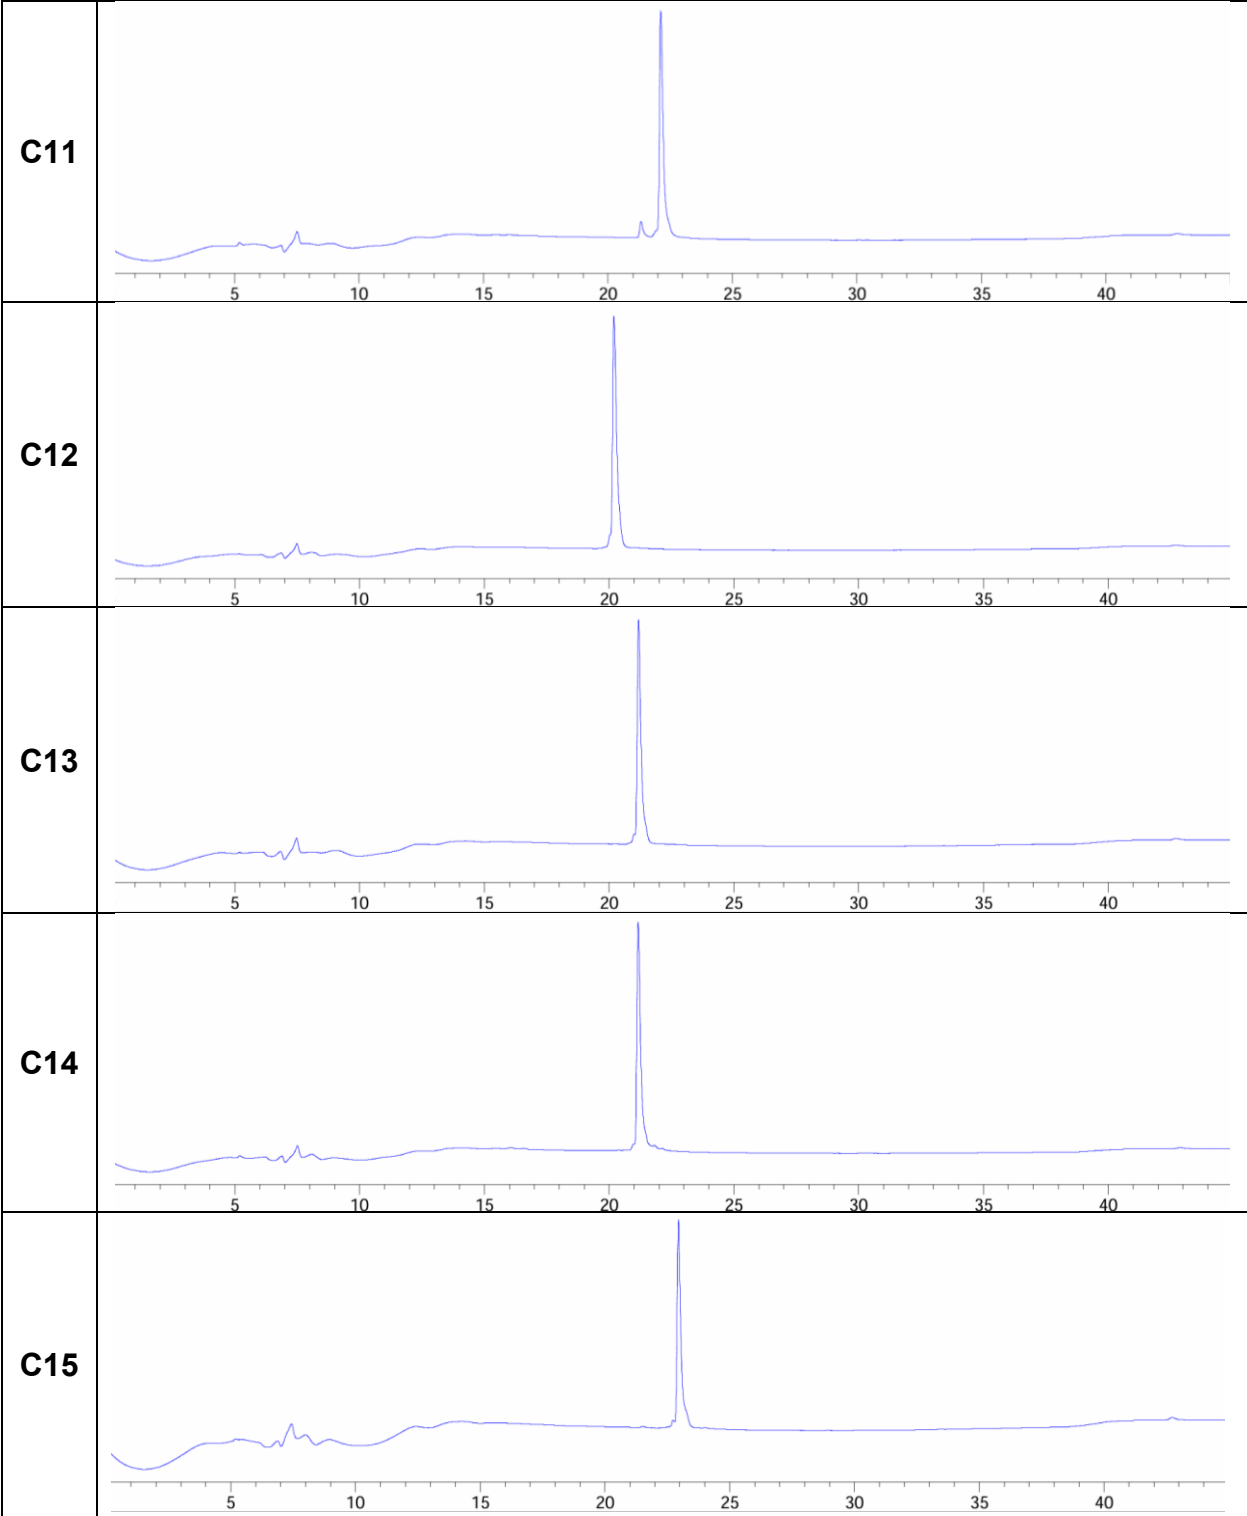

**Figure S4. Analytical HPLC chromatograms for all peptides (continued)**

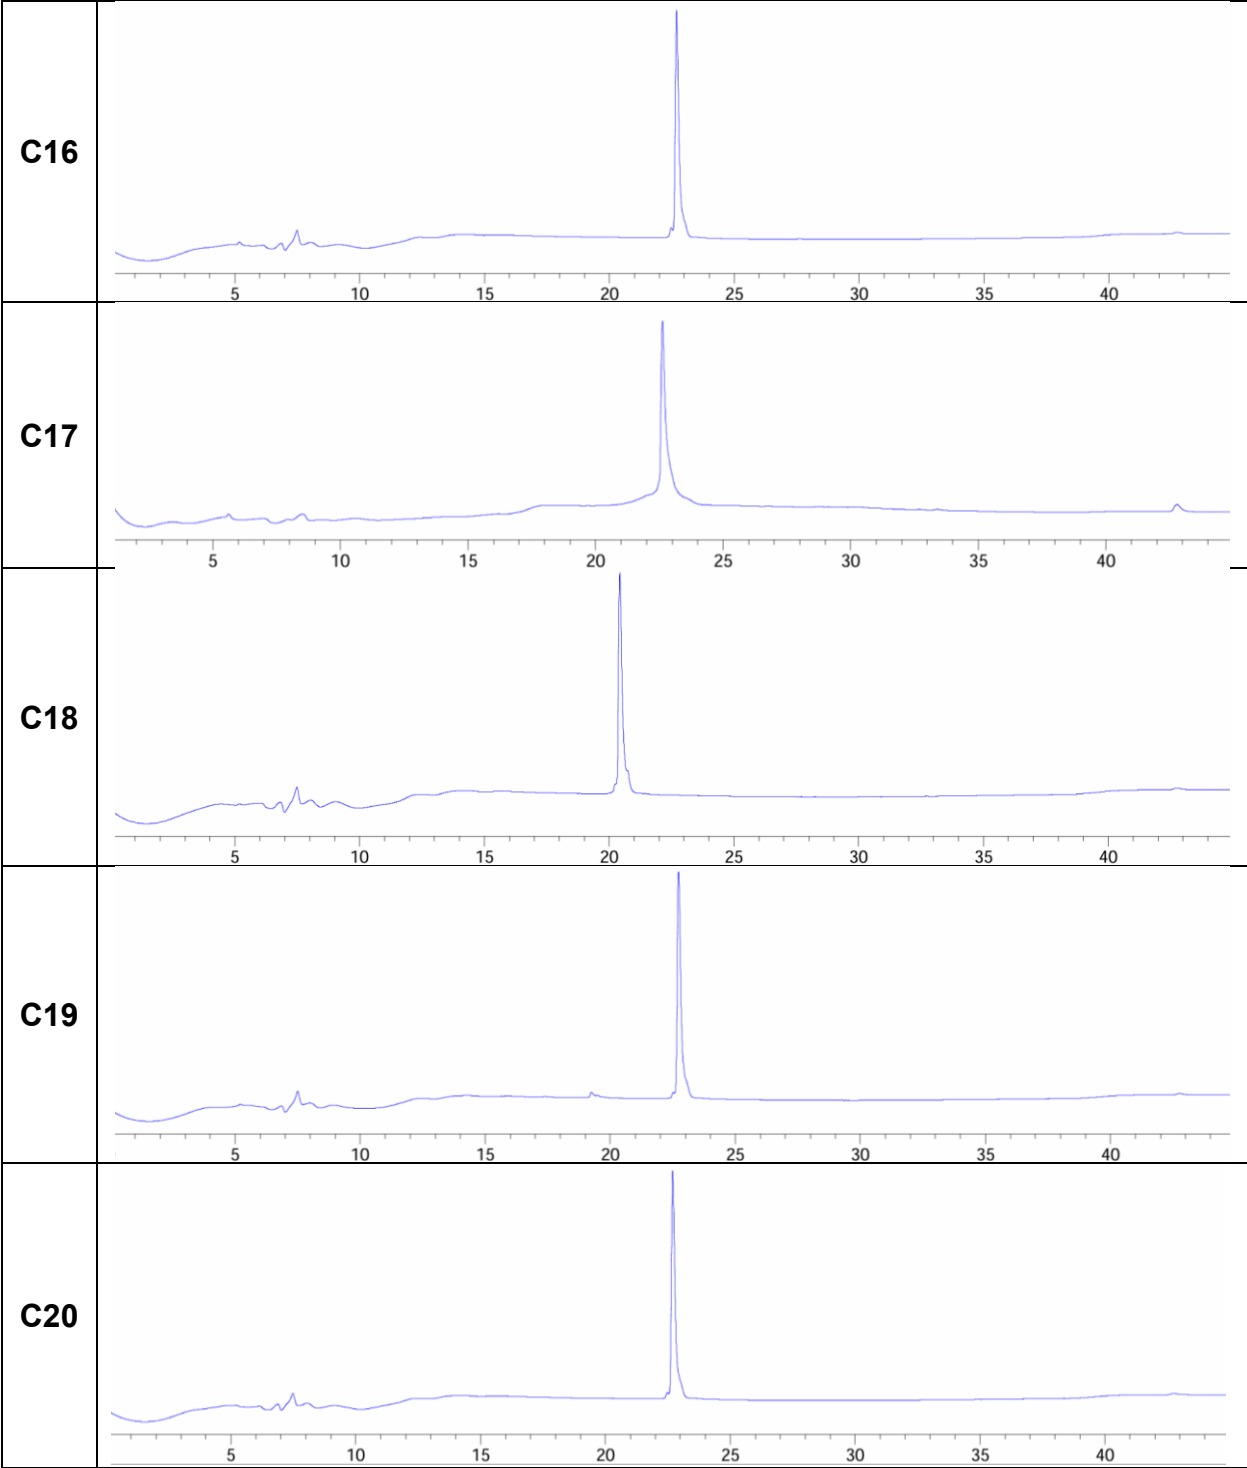

**Figure S4. Analytical HPLC chromatograms for all peptides (continued)**

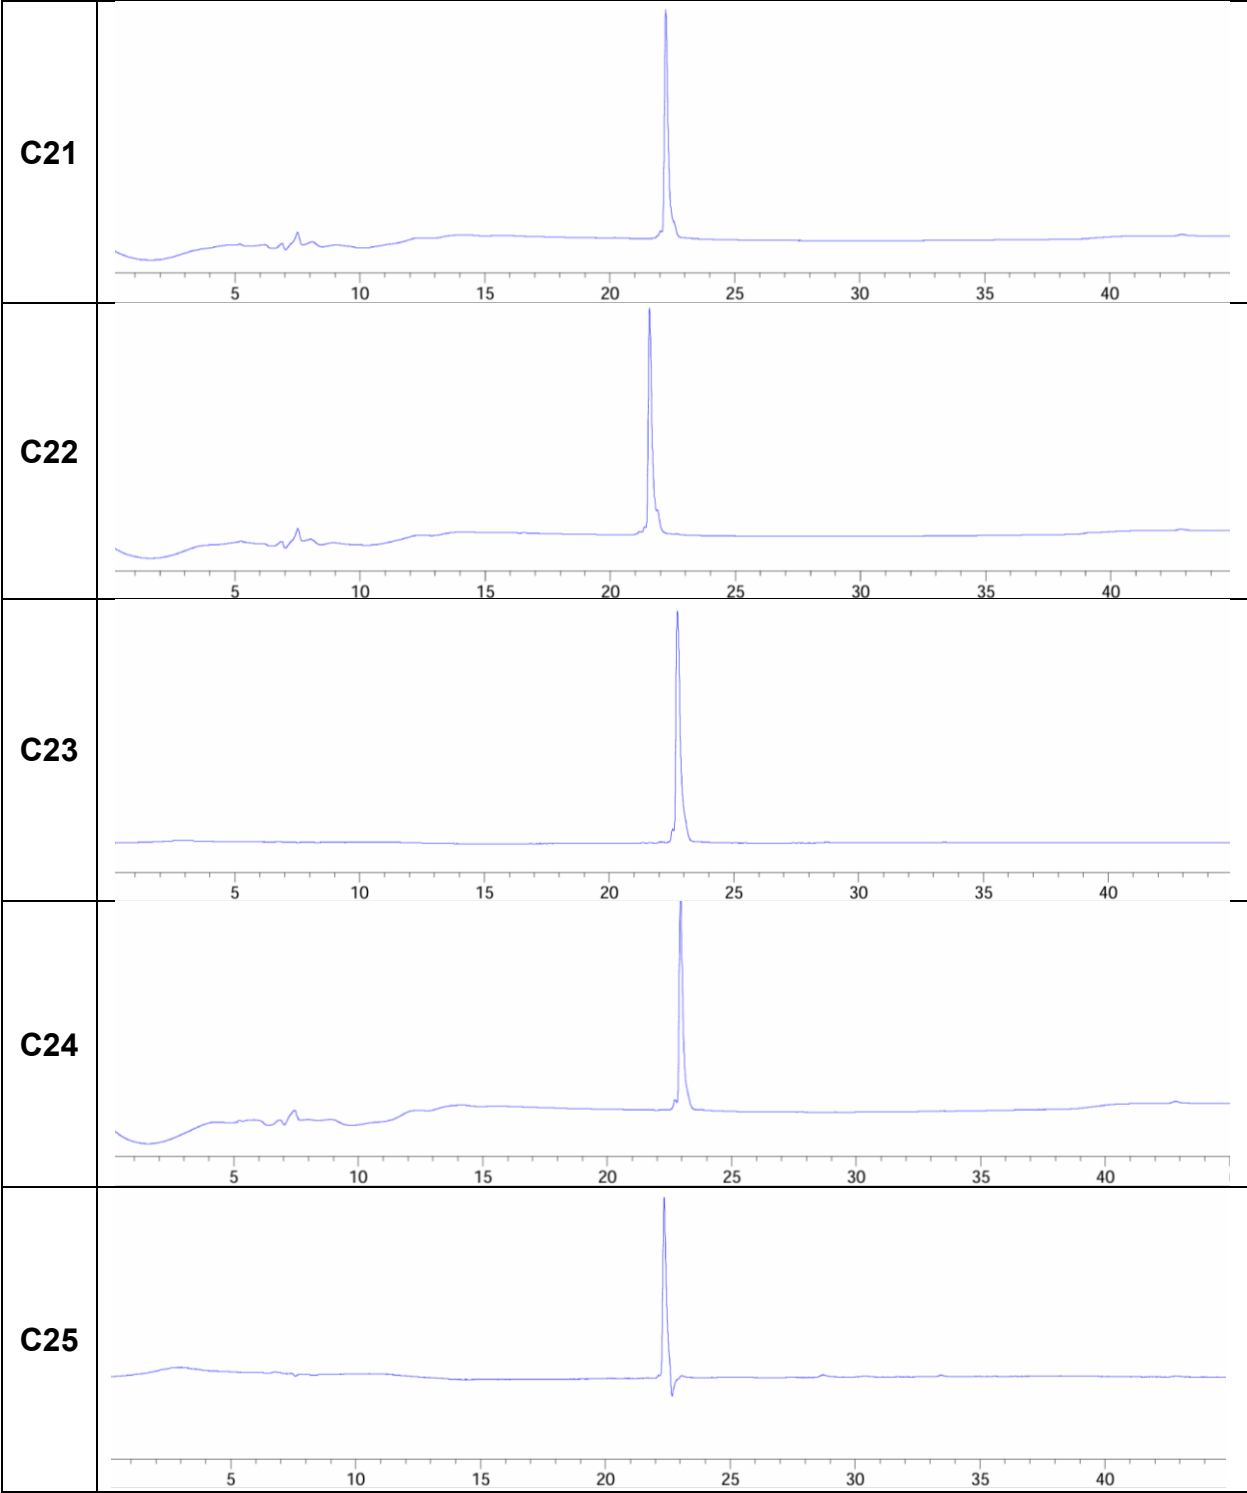

Figure S4. Analytical HPLC chromatograms for all peptides (continued)

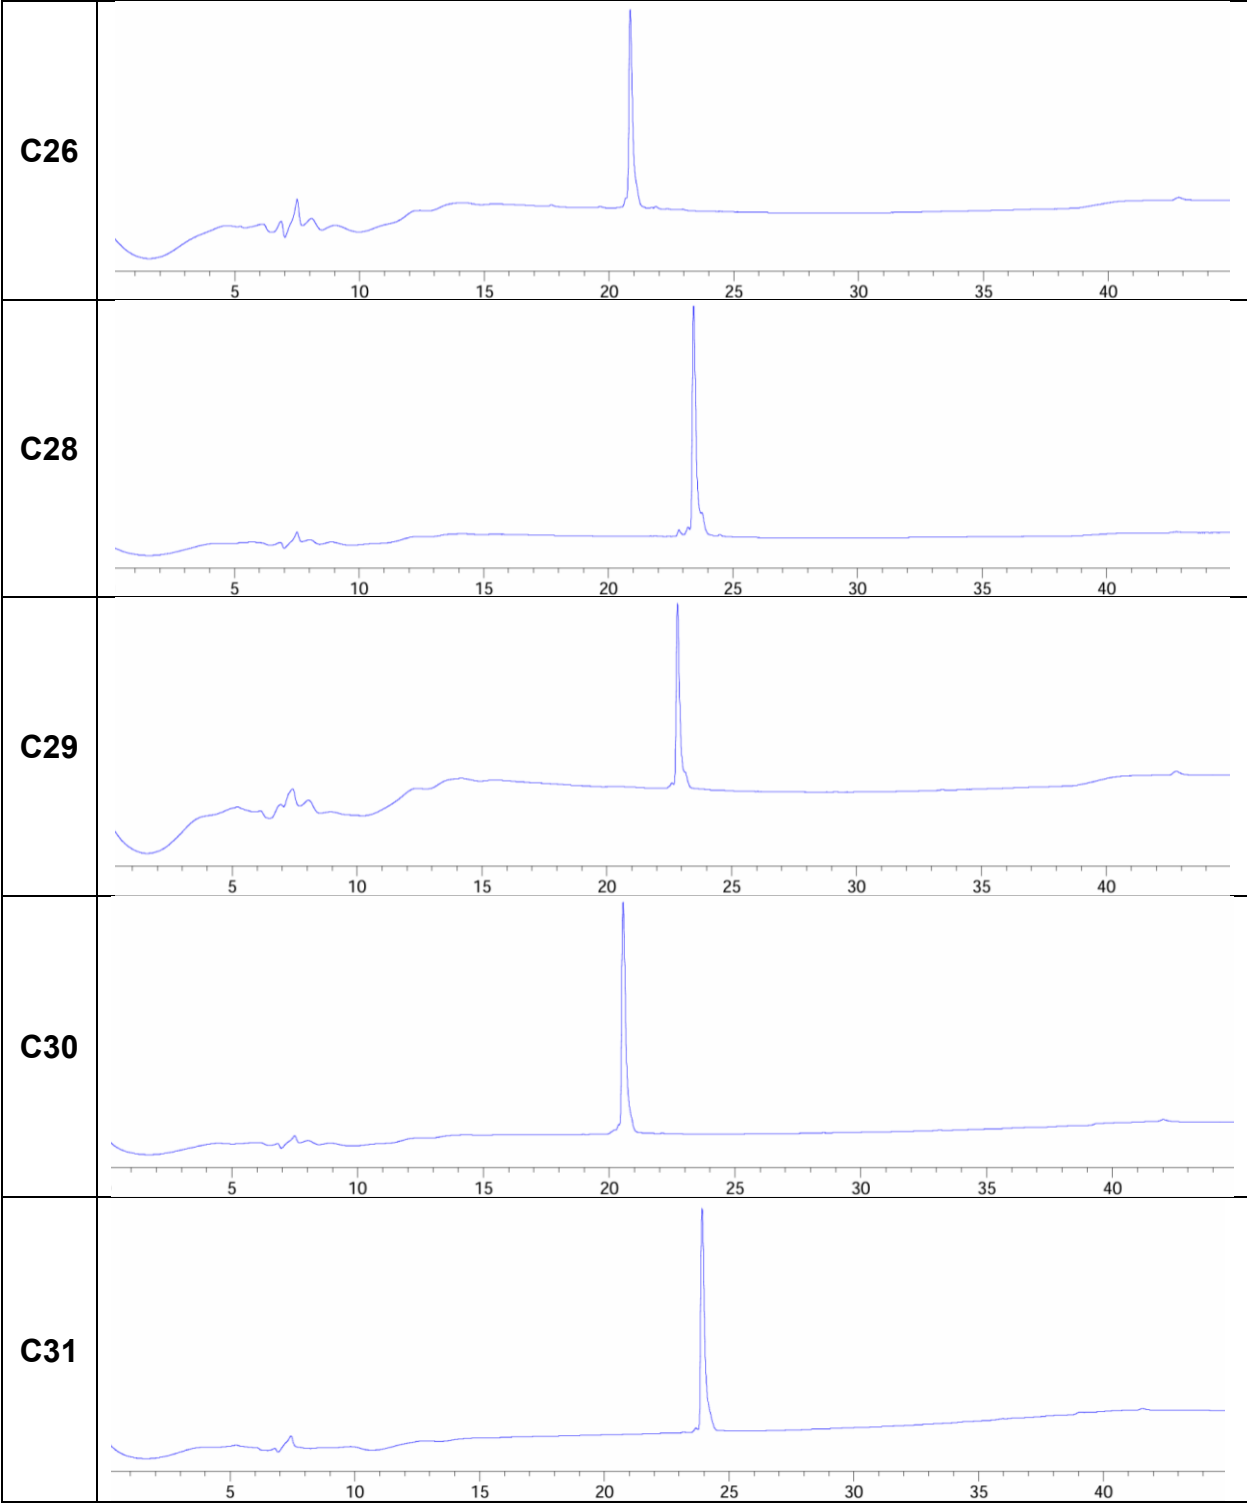

**Figure S4. Analytical HPLC chromatograms for all peptides (continued)**

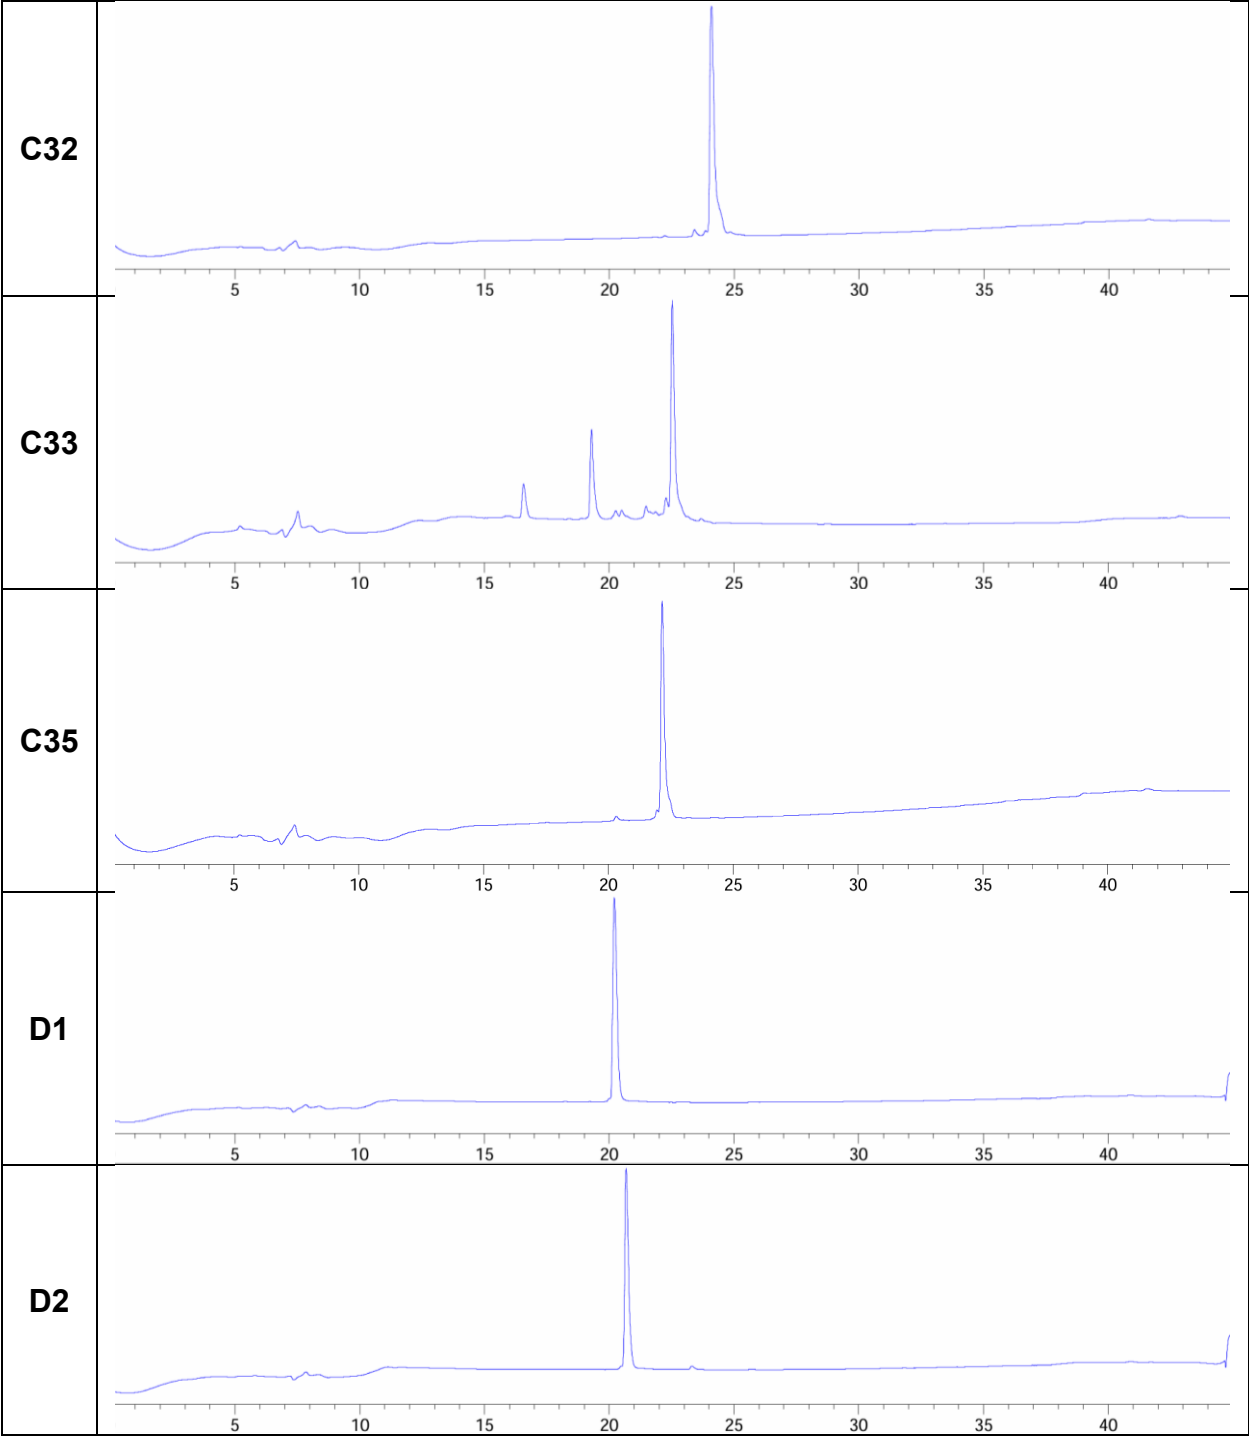

**Figure S4. Analytical HPLC chromatograms for all peptides (continued)**

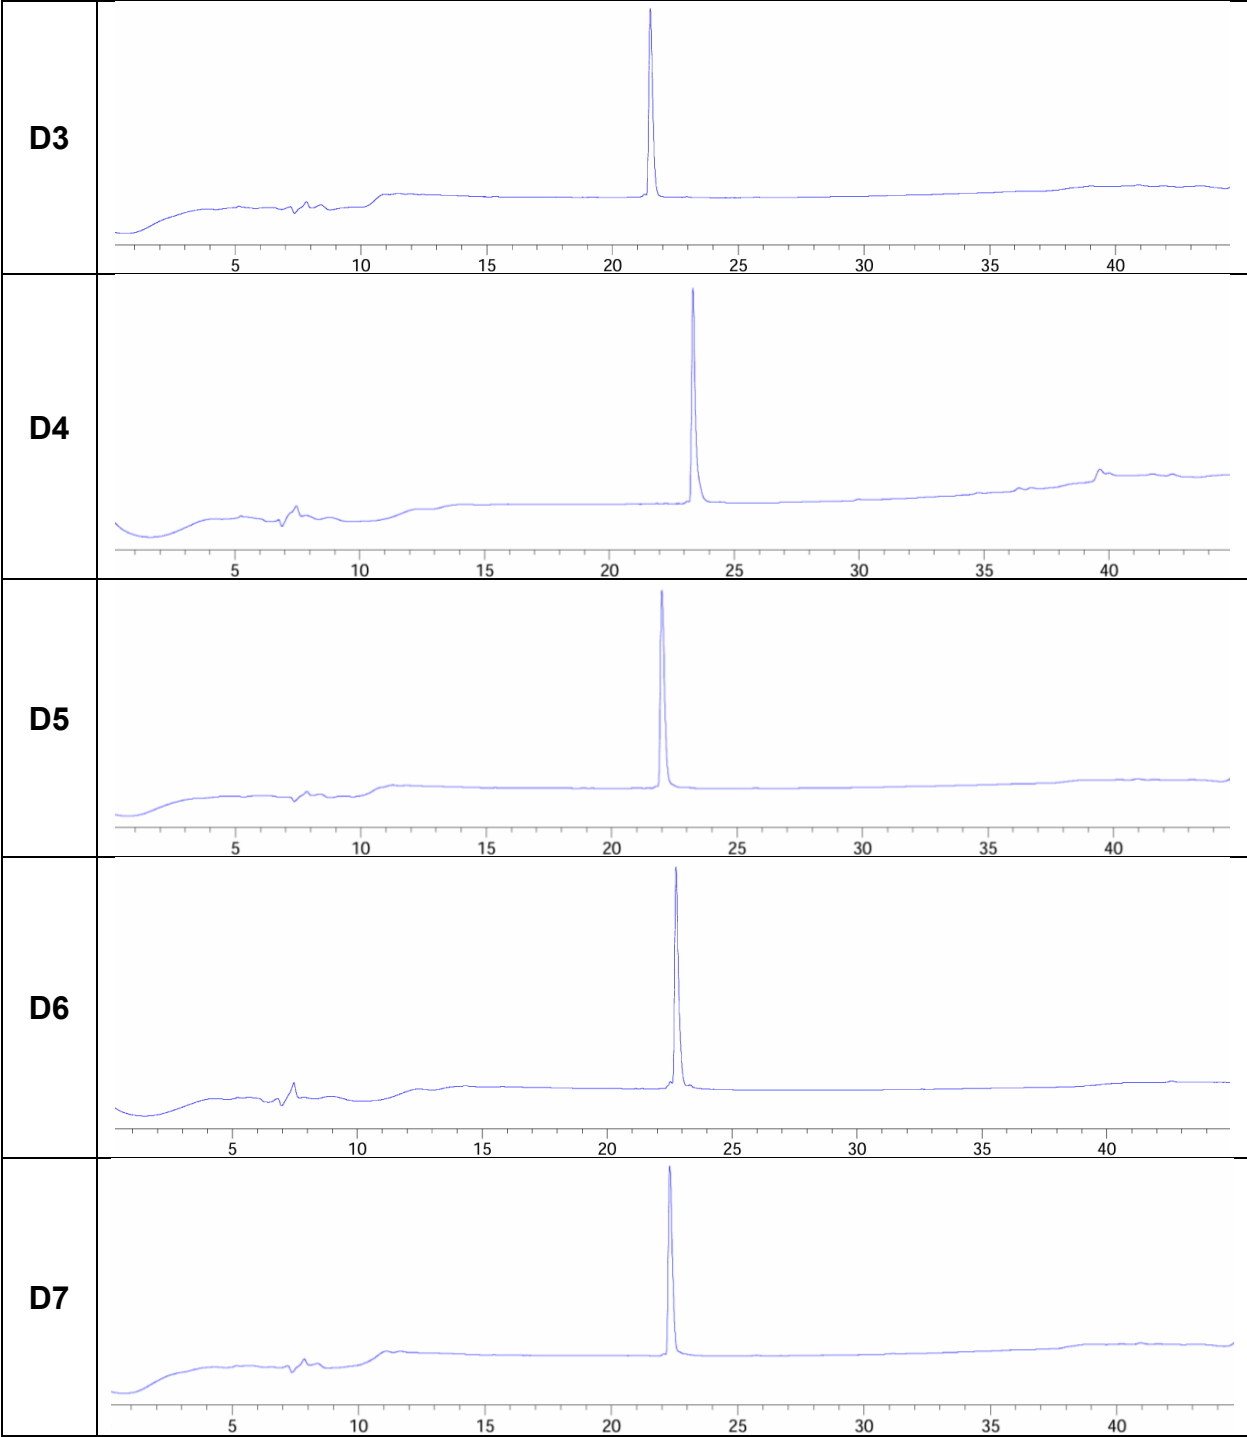

**Figure S4. Analytical HPLC chromatograms for all peptides (continued)**

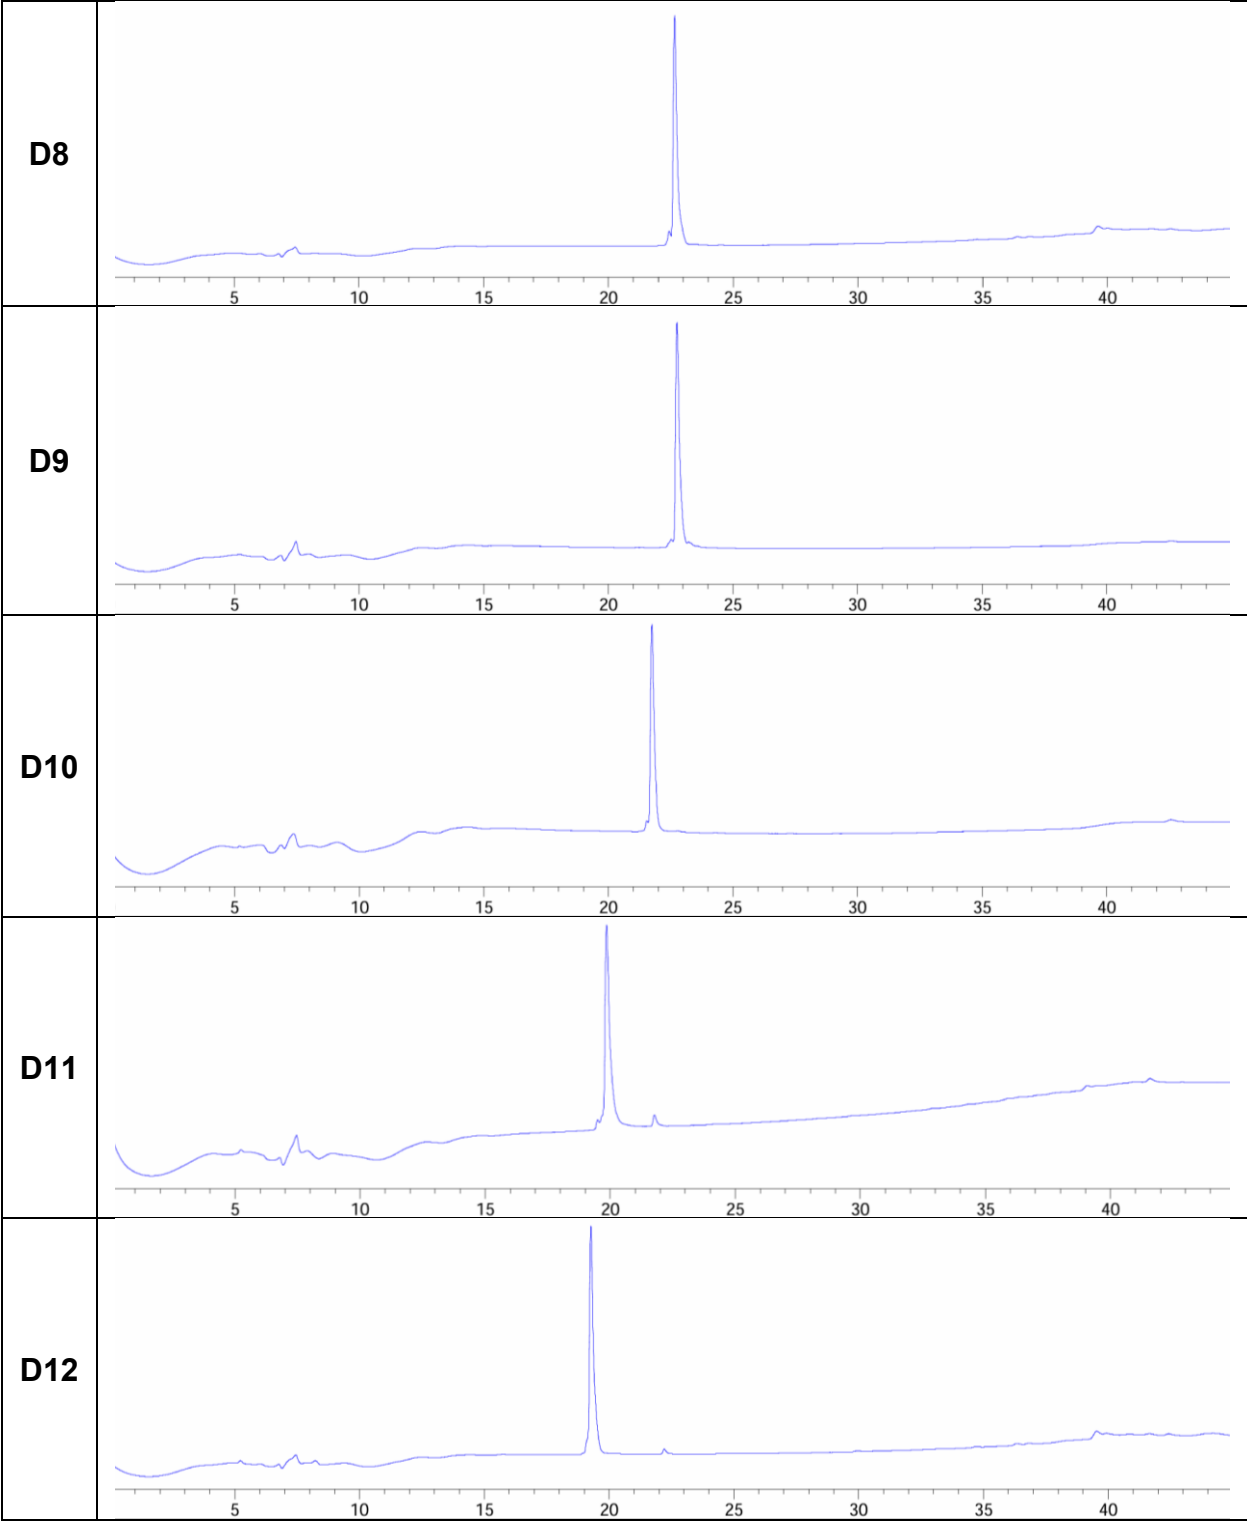

**Figure S4. Analytical HPLC chromatograms for all peptides (continued)**

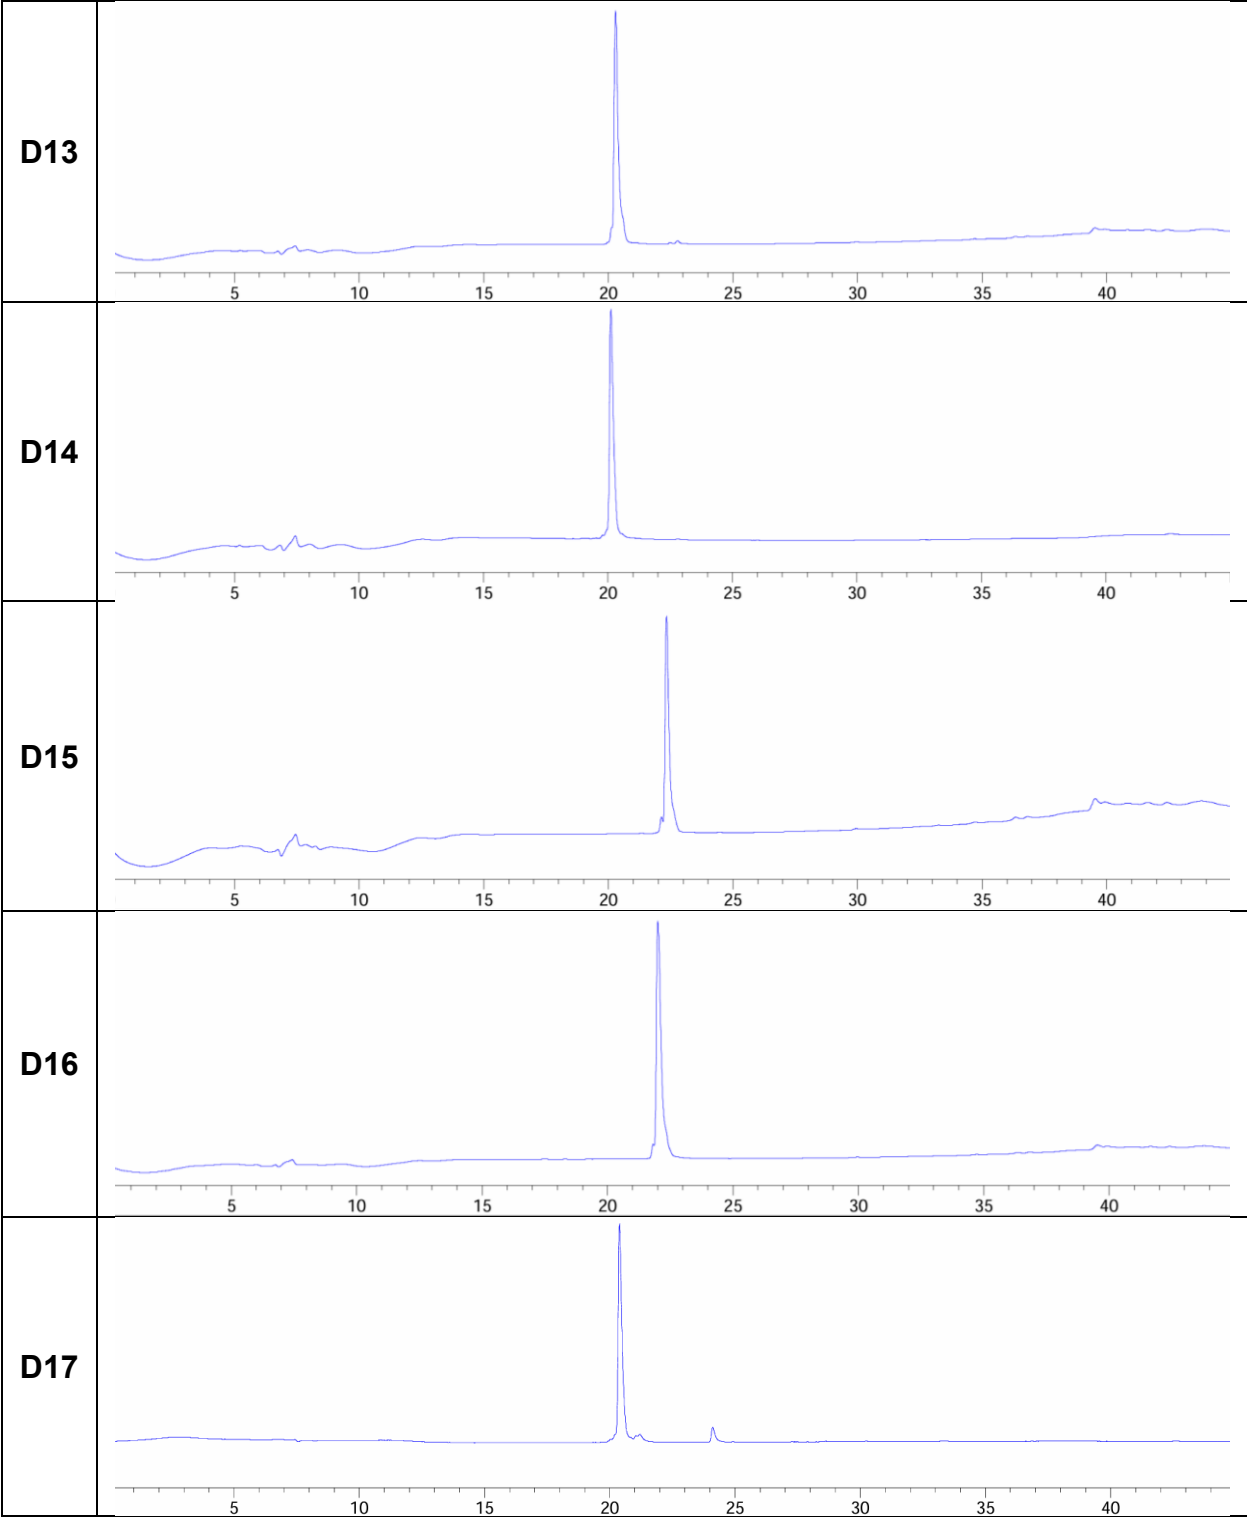

**Figure S4. Analytical HPLC chromatograms for all peptides (continued)**

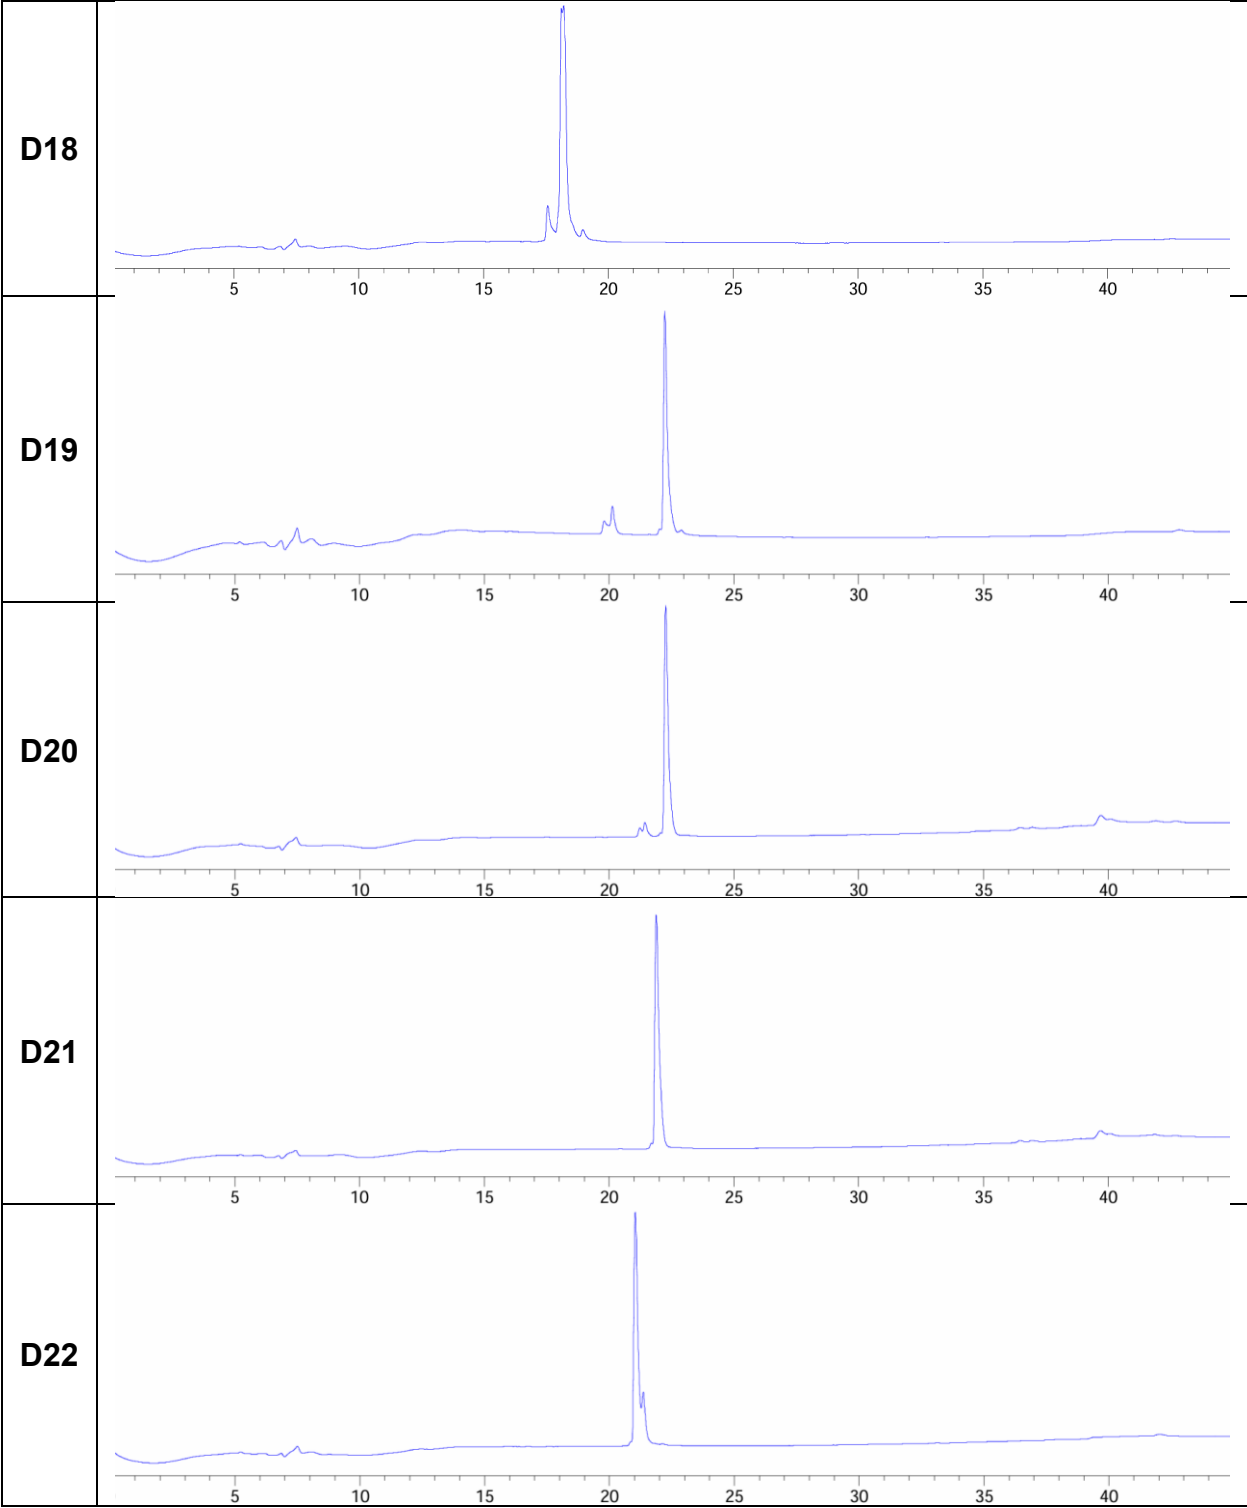

**Figure S4. Analytical HPLC chromatograms for all peptides (continued)**

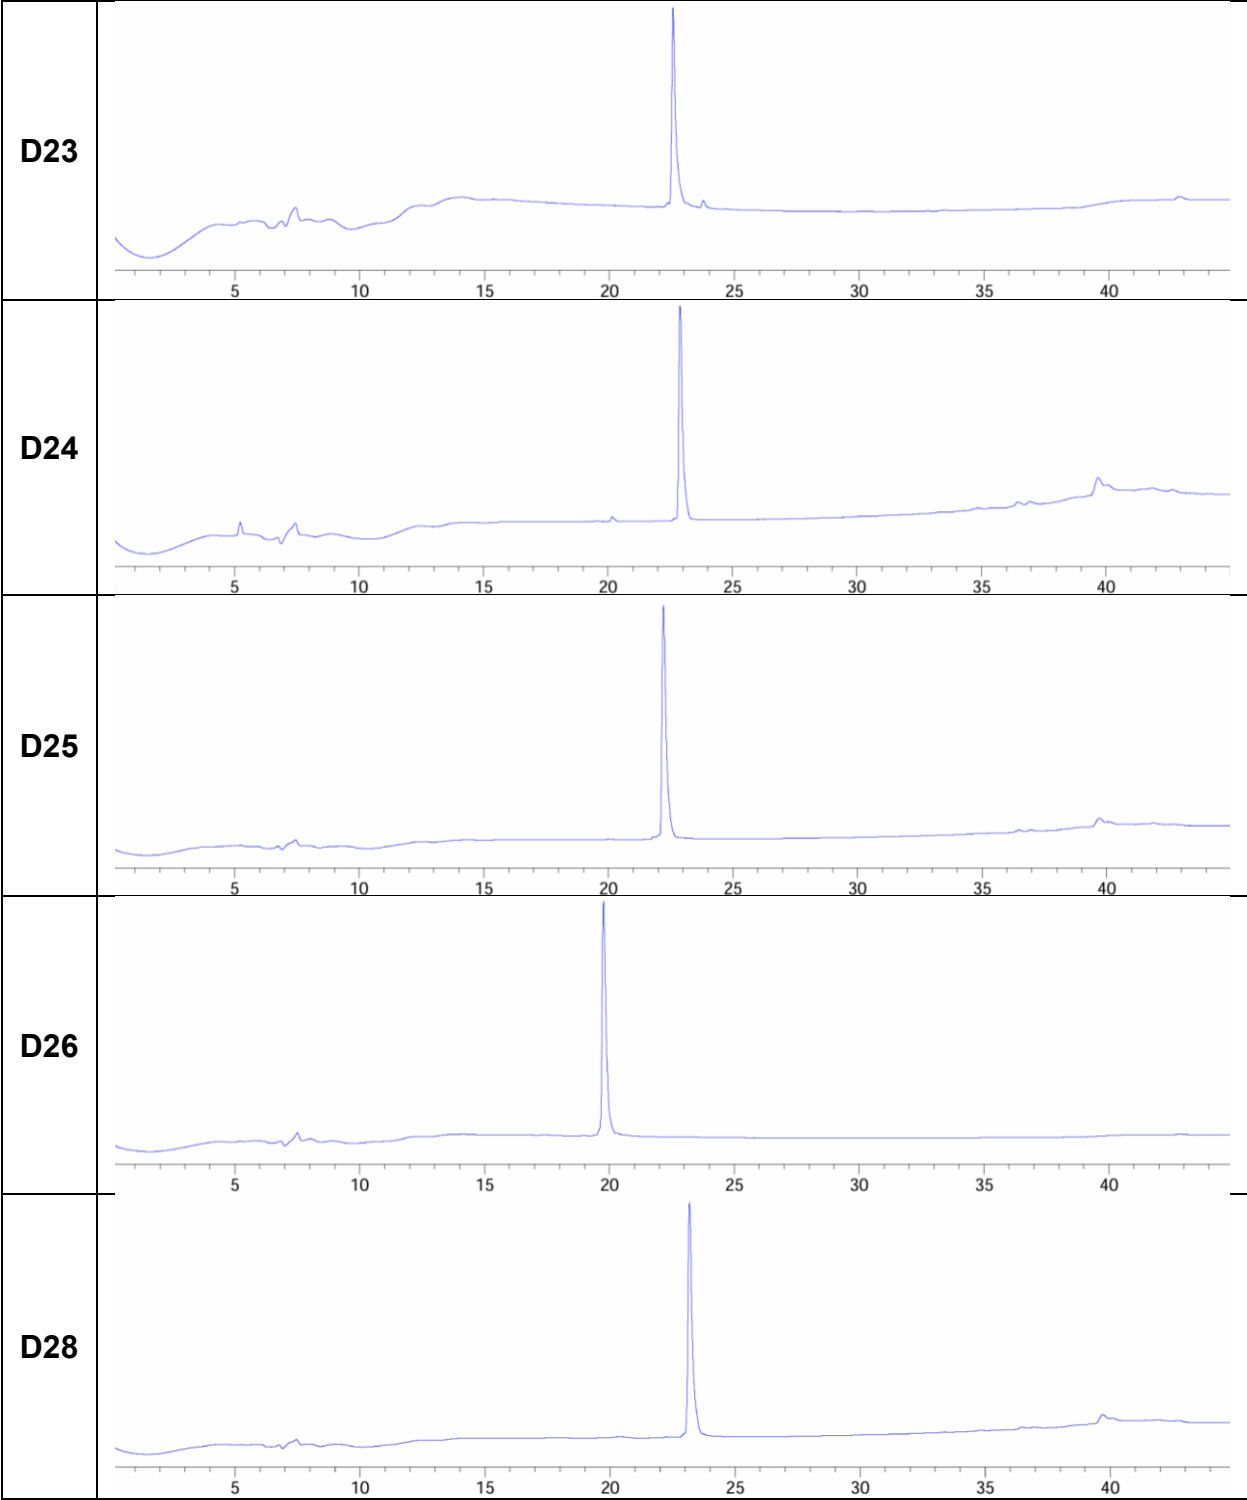

**Figure S4. Analytical HPLC chromatograms for all peptides (continued)**

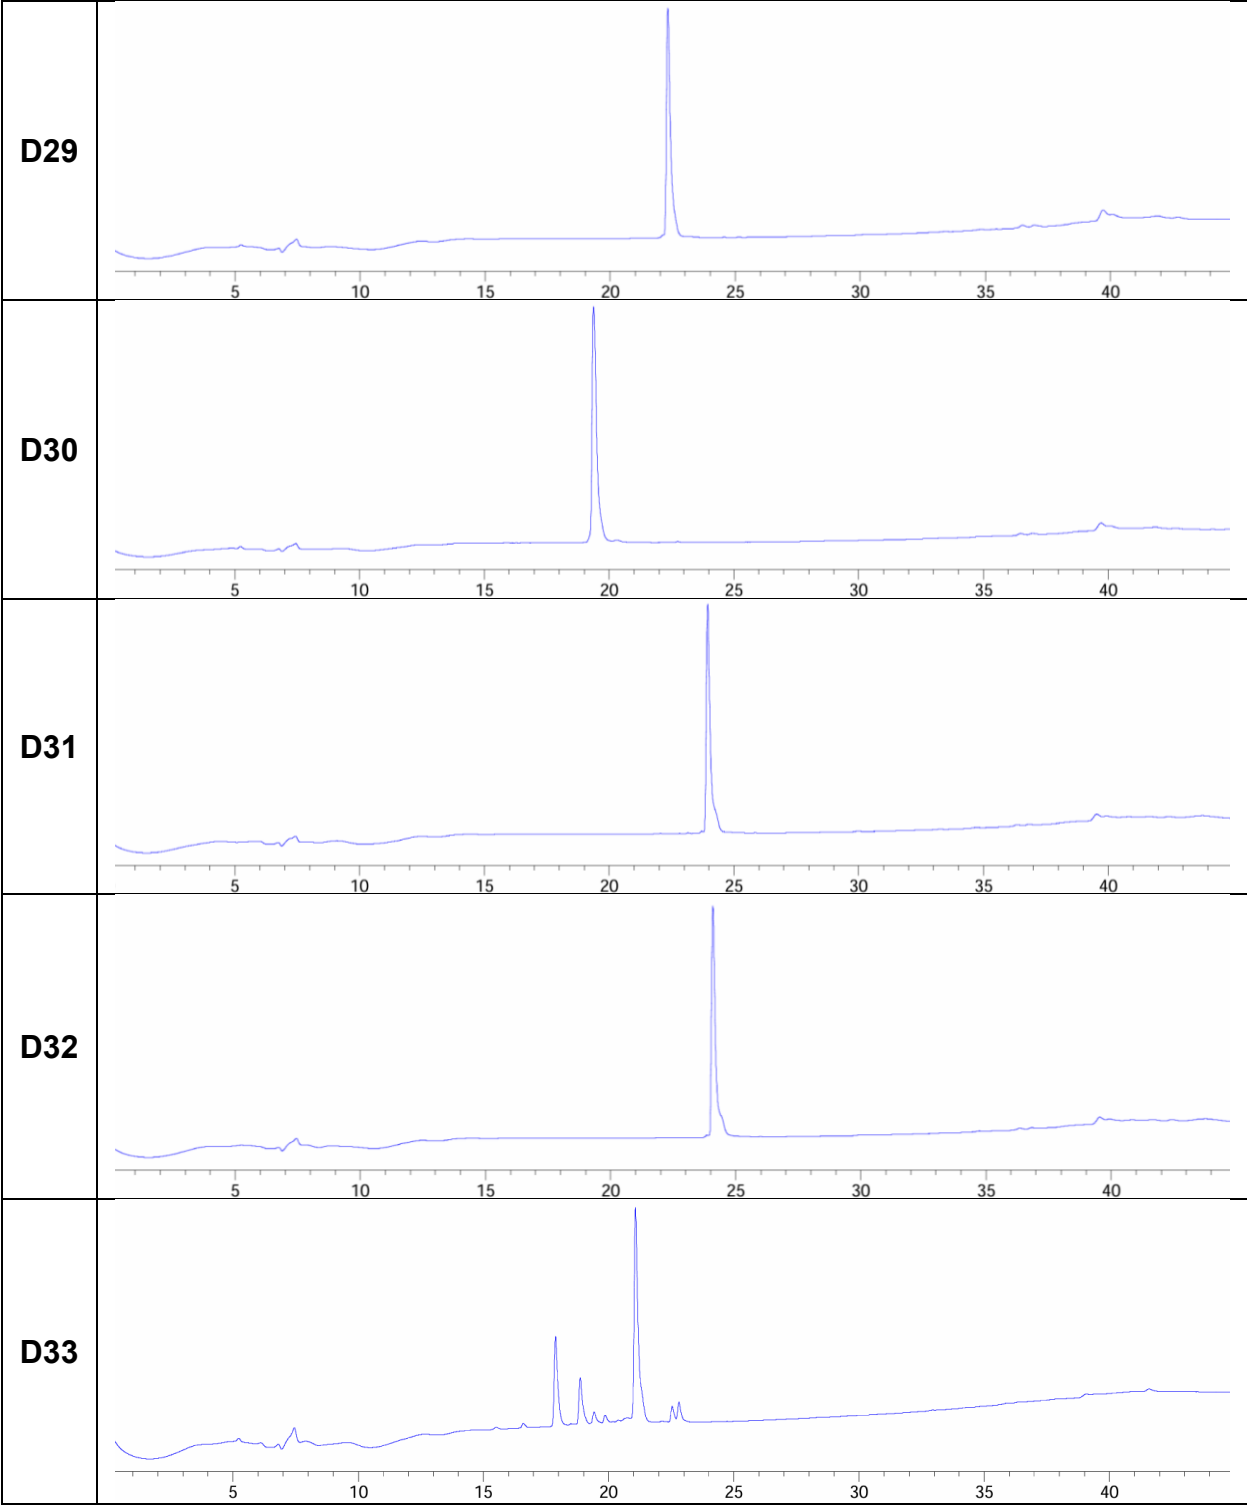

**Figure S4. Analytical HPLC chromatograms for all peptides (continued)**

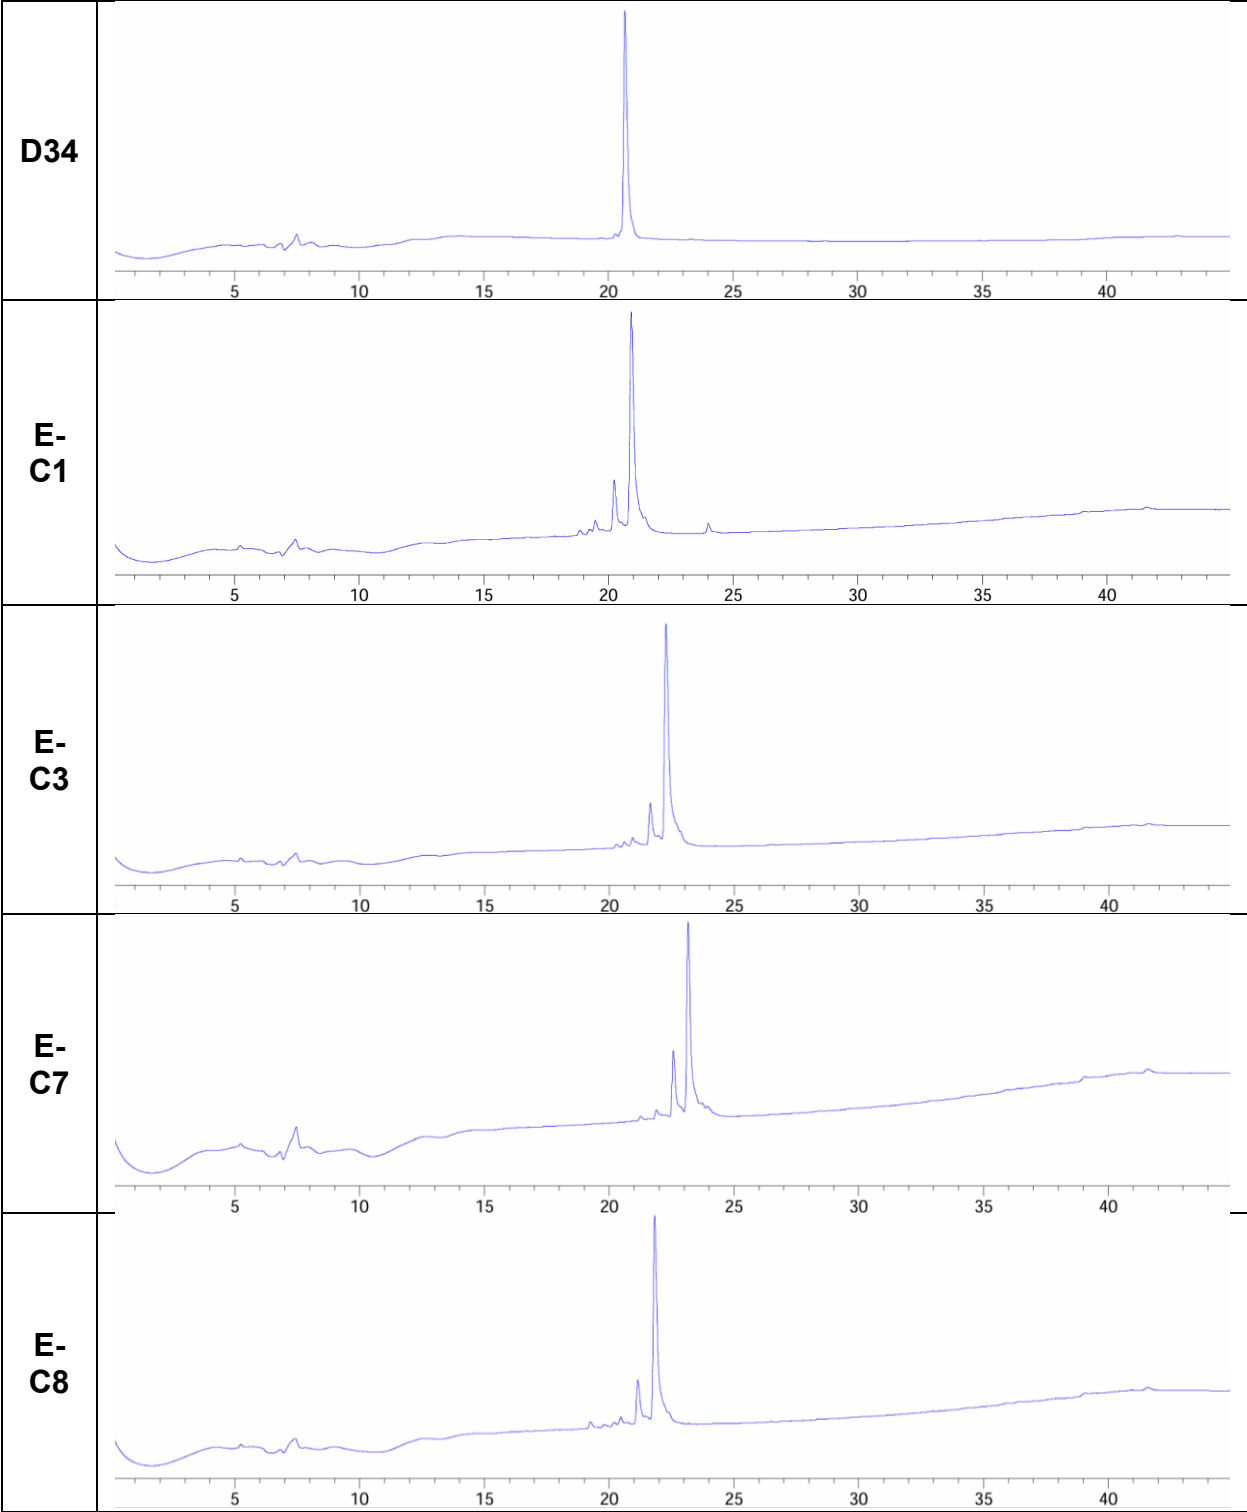

Figure S4. Analytical HPLC chromatograms for all peptides (continued)

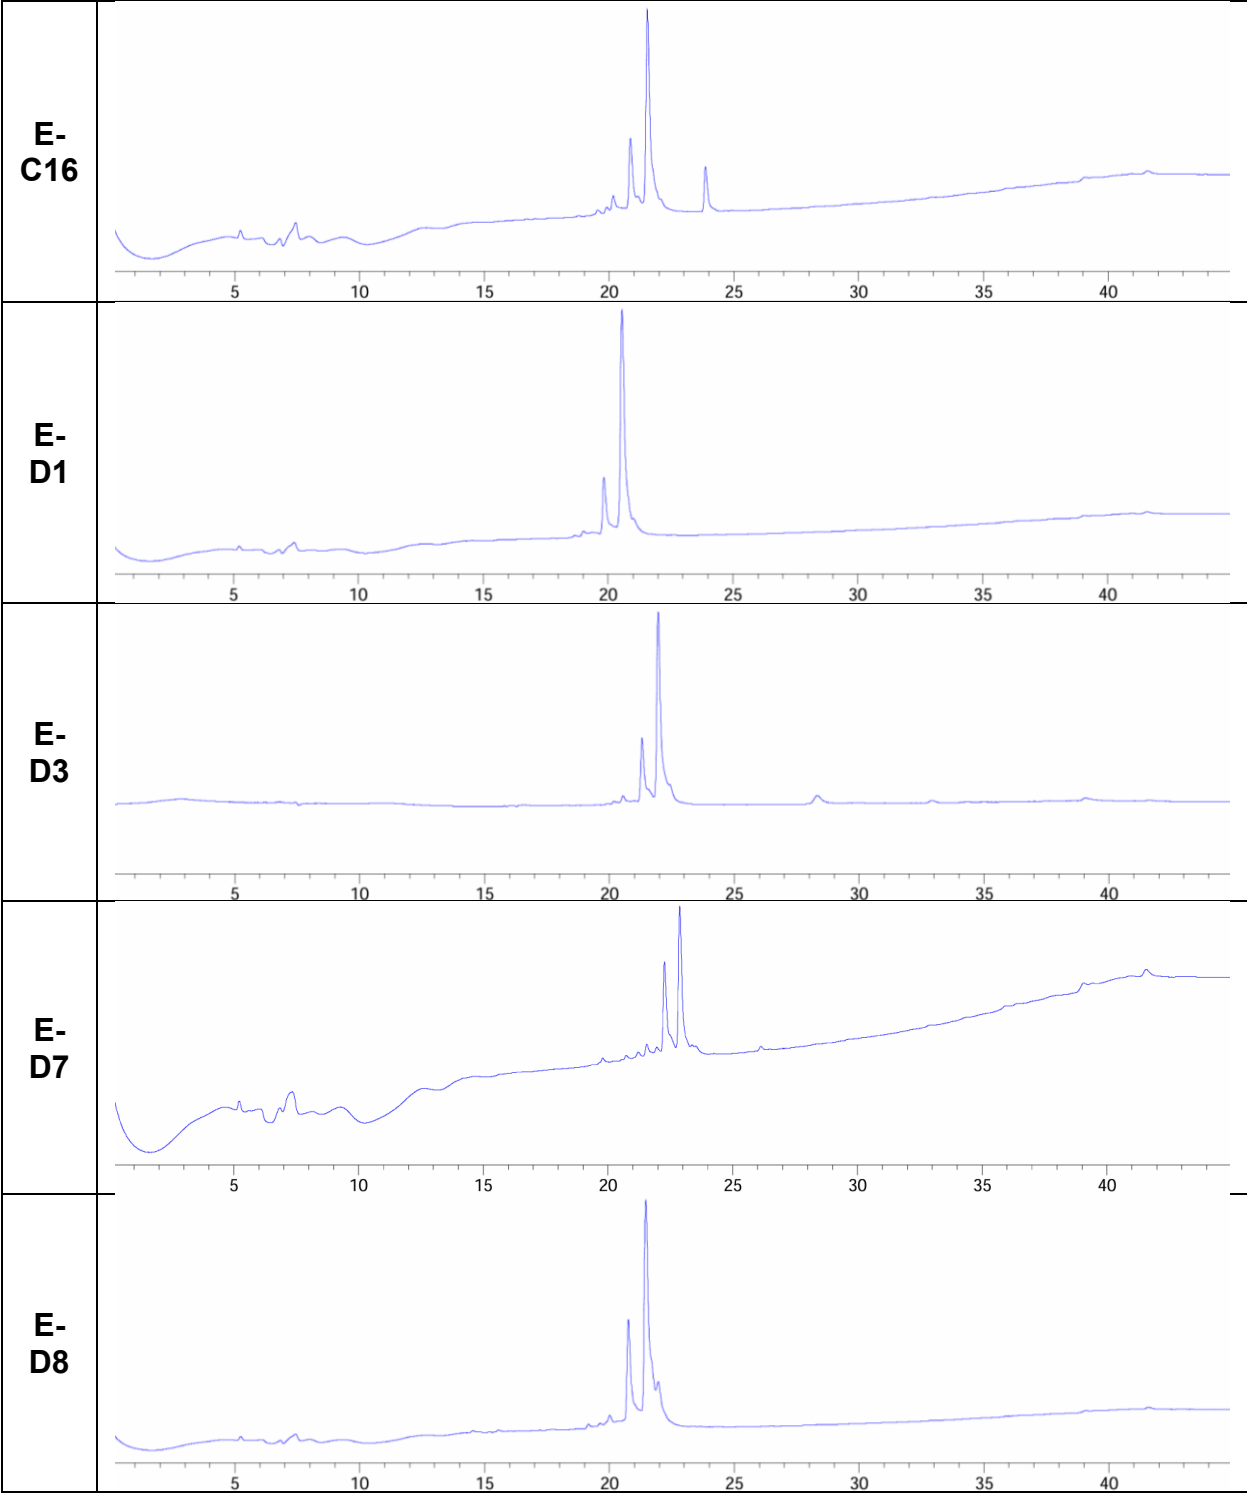

Figure S4. Analytical HPLC chromatograms for all peptides (continued)

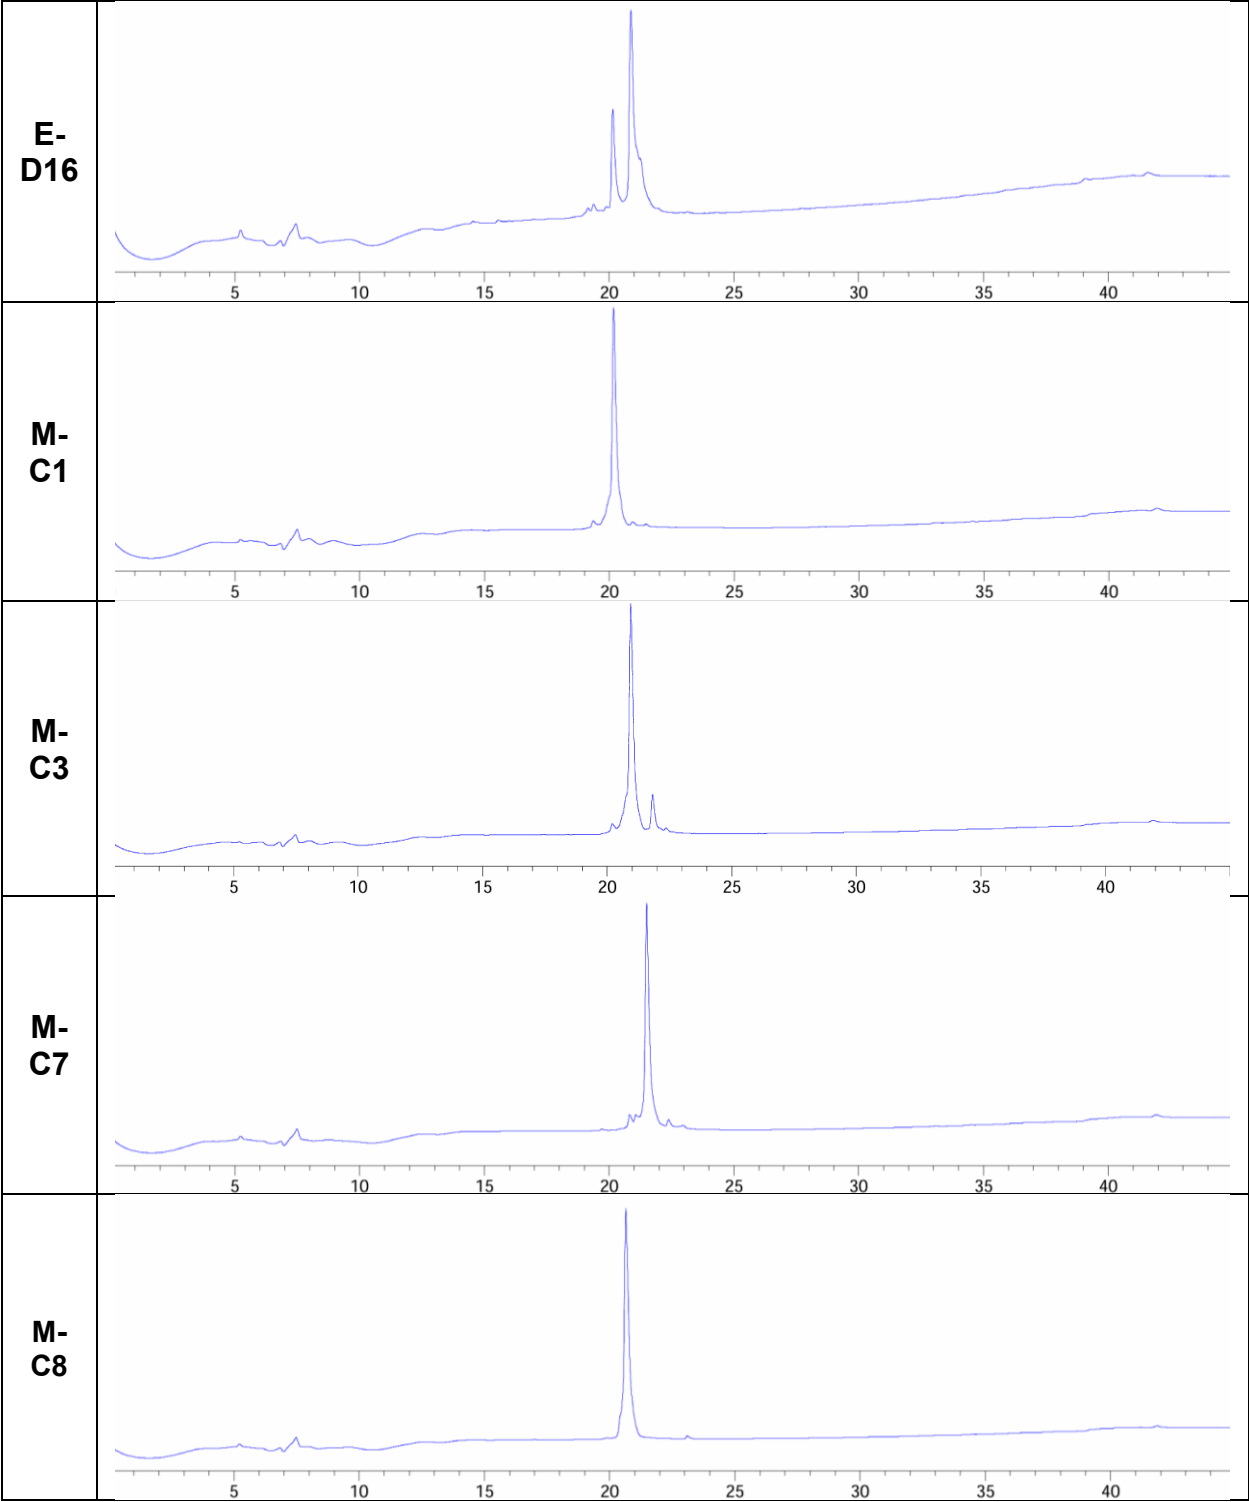

Figure S4. Analytical HPLC chromatograms for all peptides (continued)

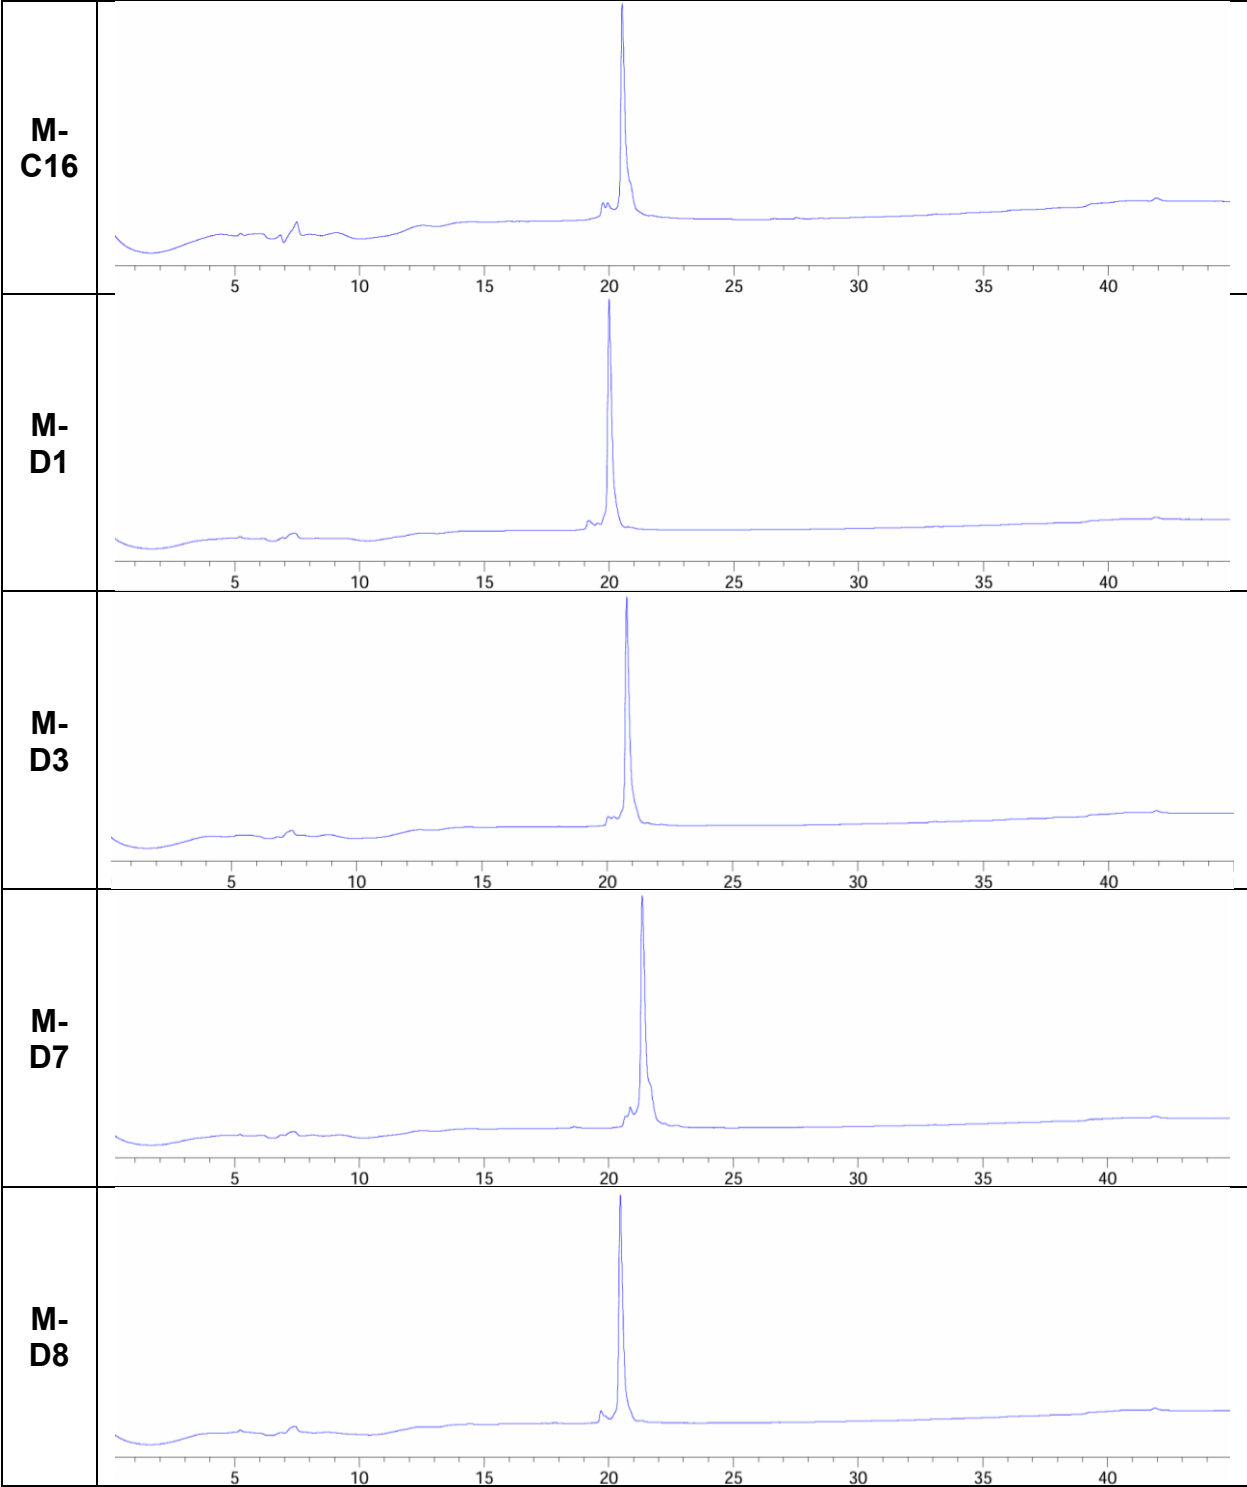

**Figure S4. Analytical HPLC chromatograms for all peptides (continued)**

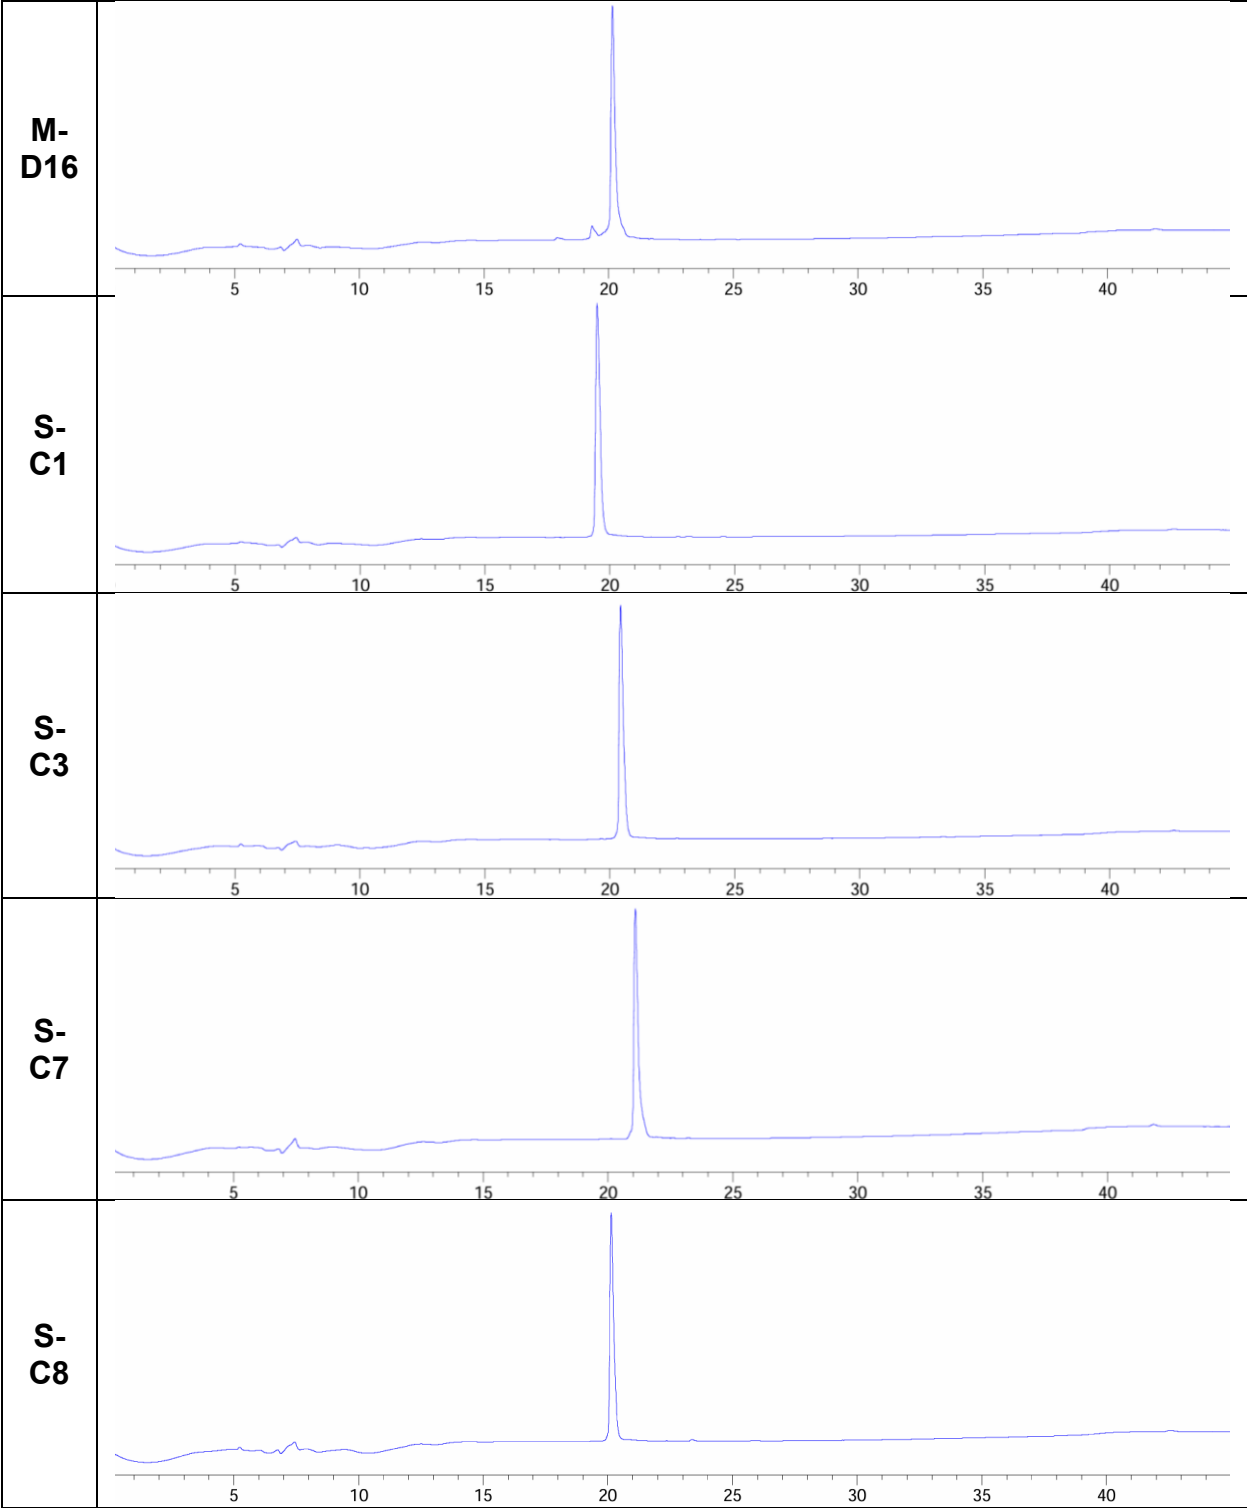

**Figure S4. Analytical HPLC chromatograms for all peptides (continued)**

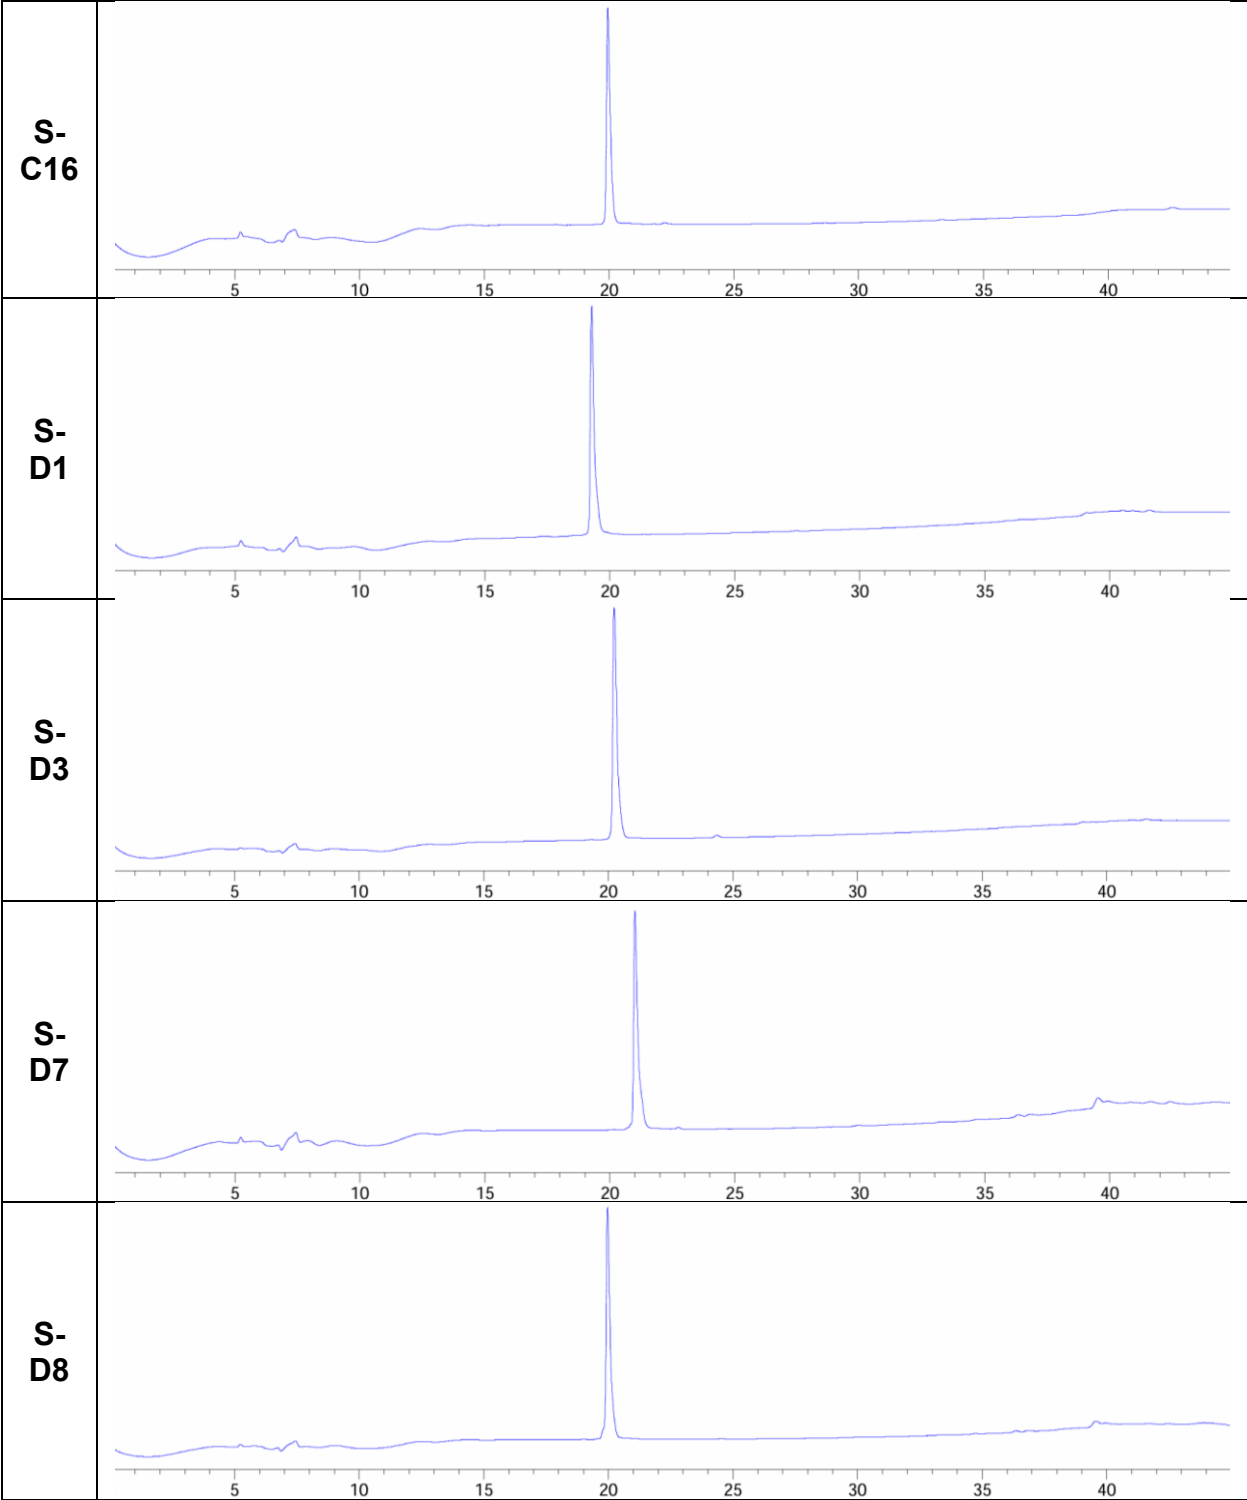

**Figure S4. Analytical HPLC chromatograms for all peptides (continued)**

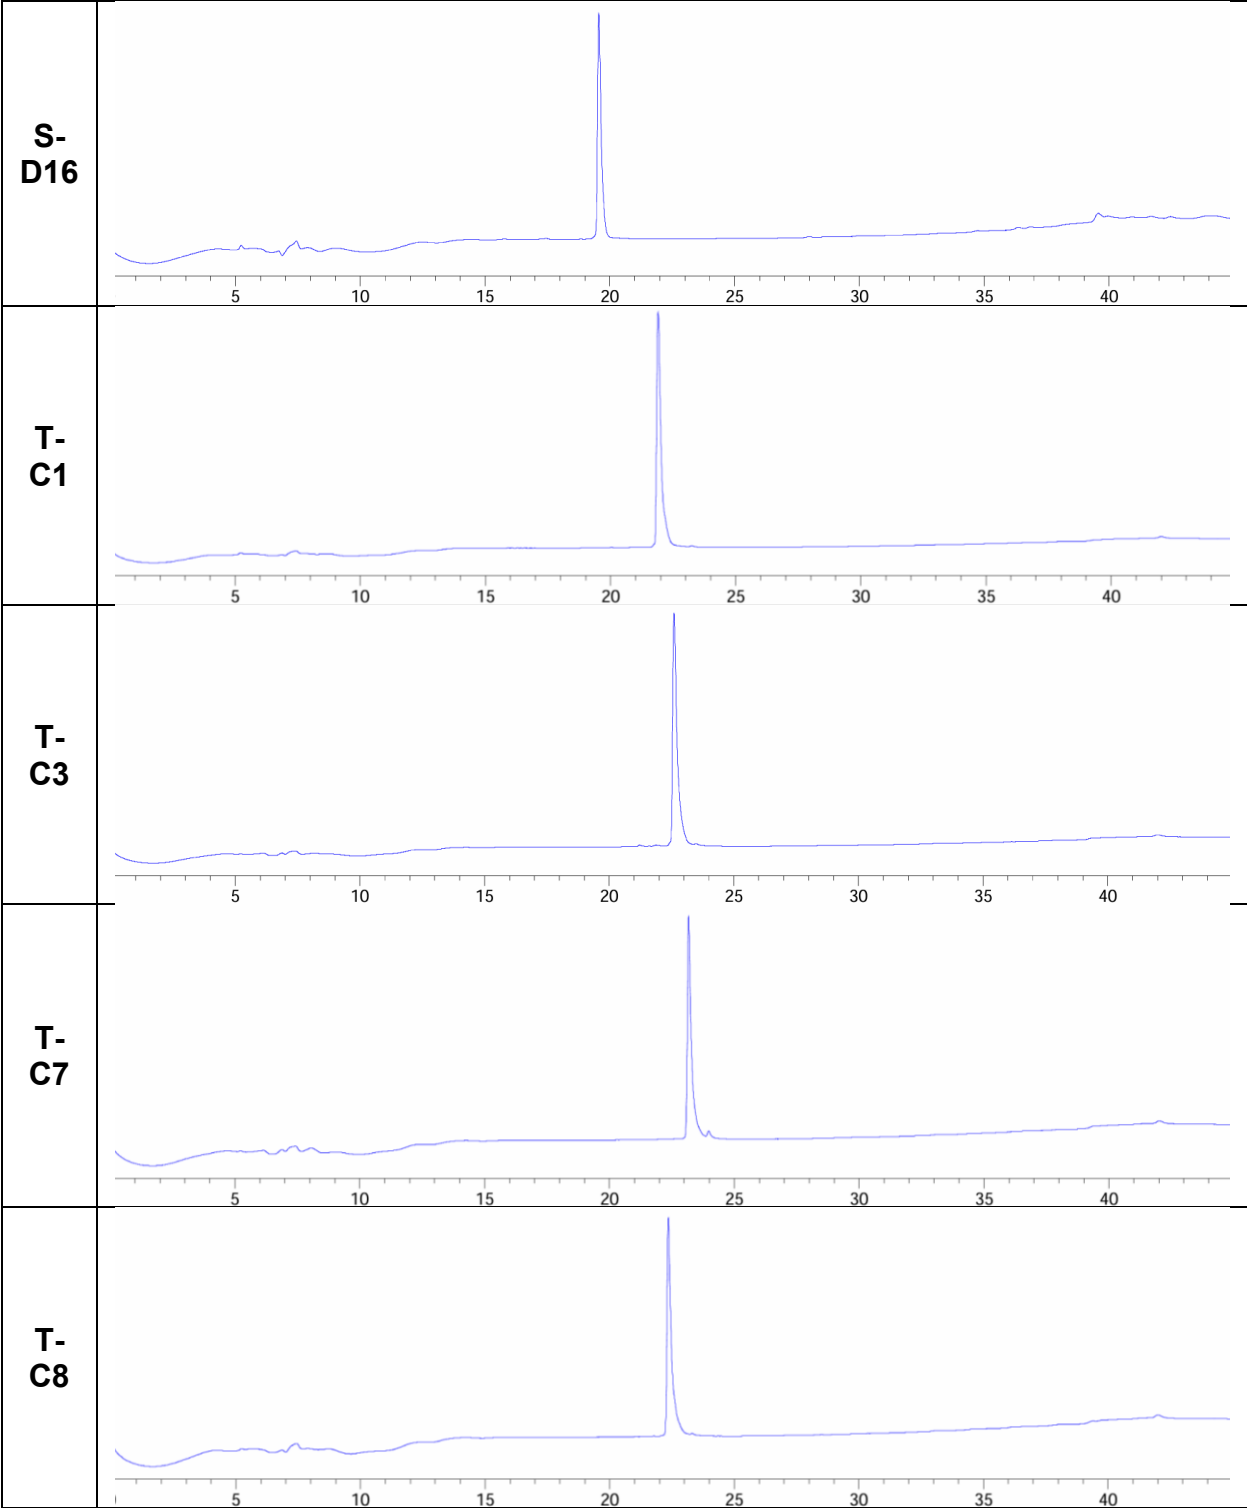

**Figure S4. Analytical HPLC chromatograms for all peptides (continued)**

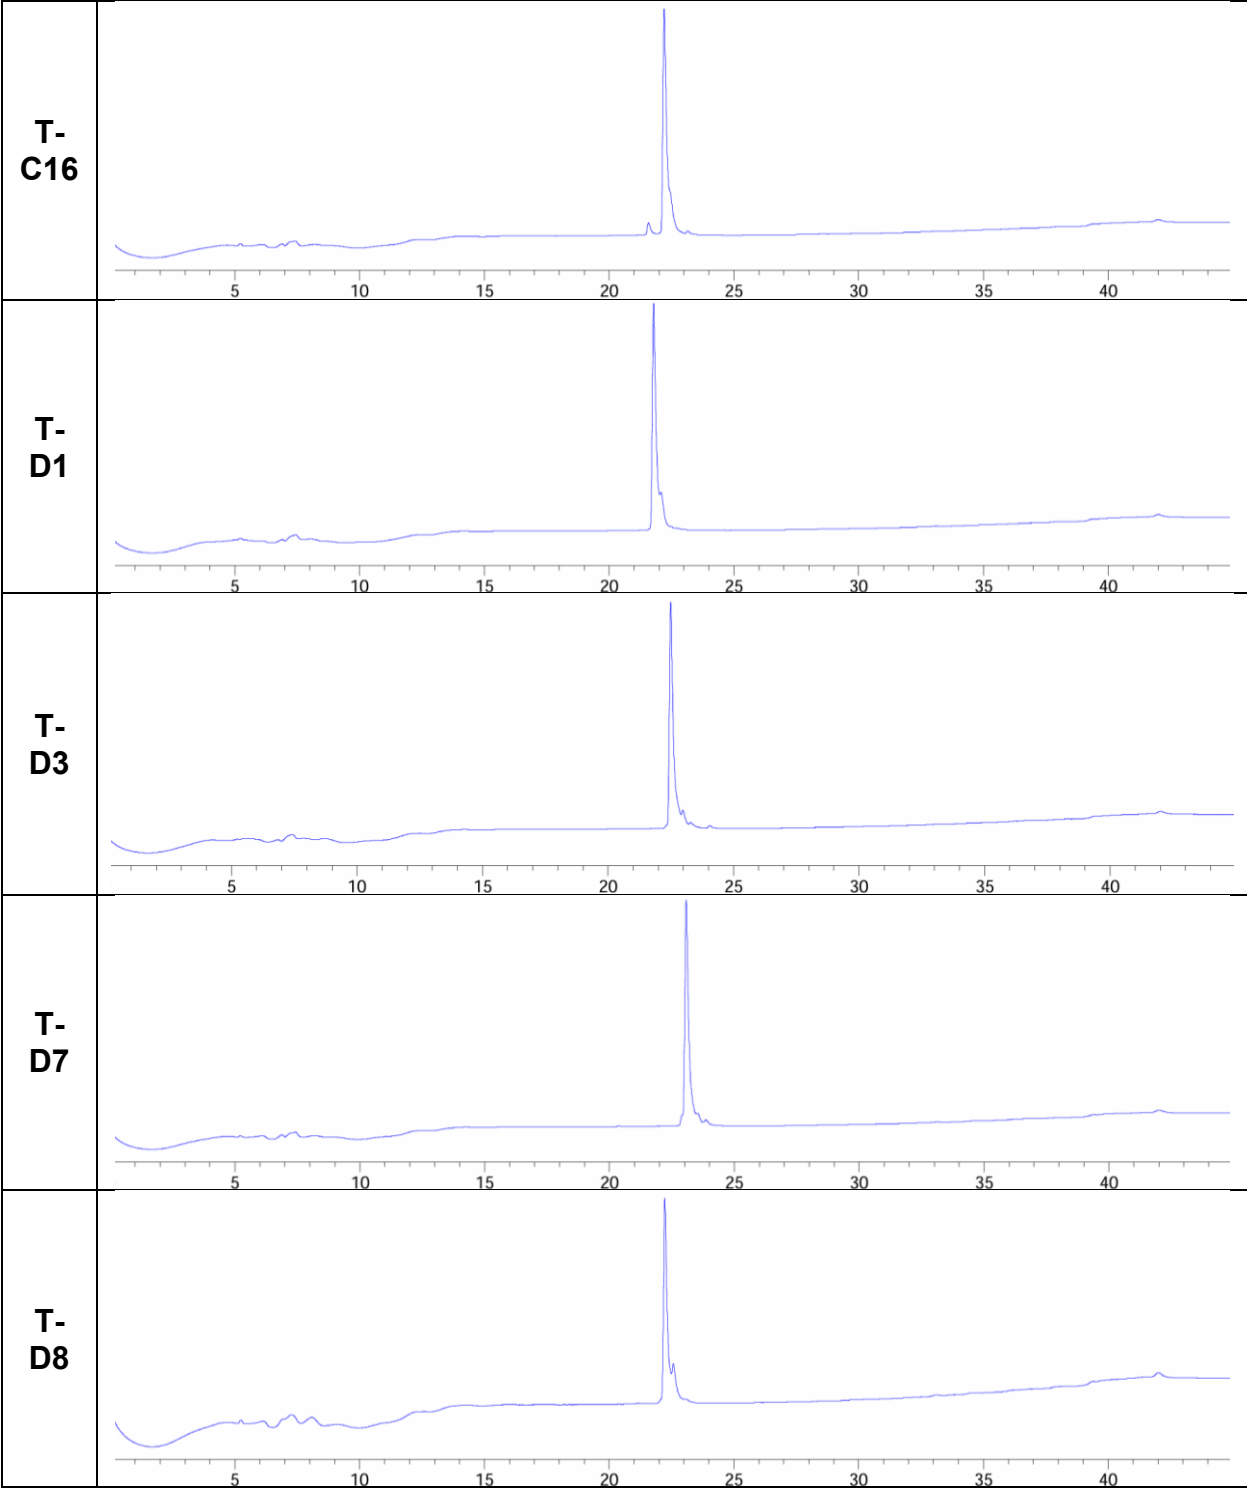

Figure S4. Analytical HPLC chromatograms for all peptides (continued)

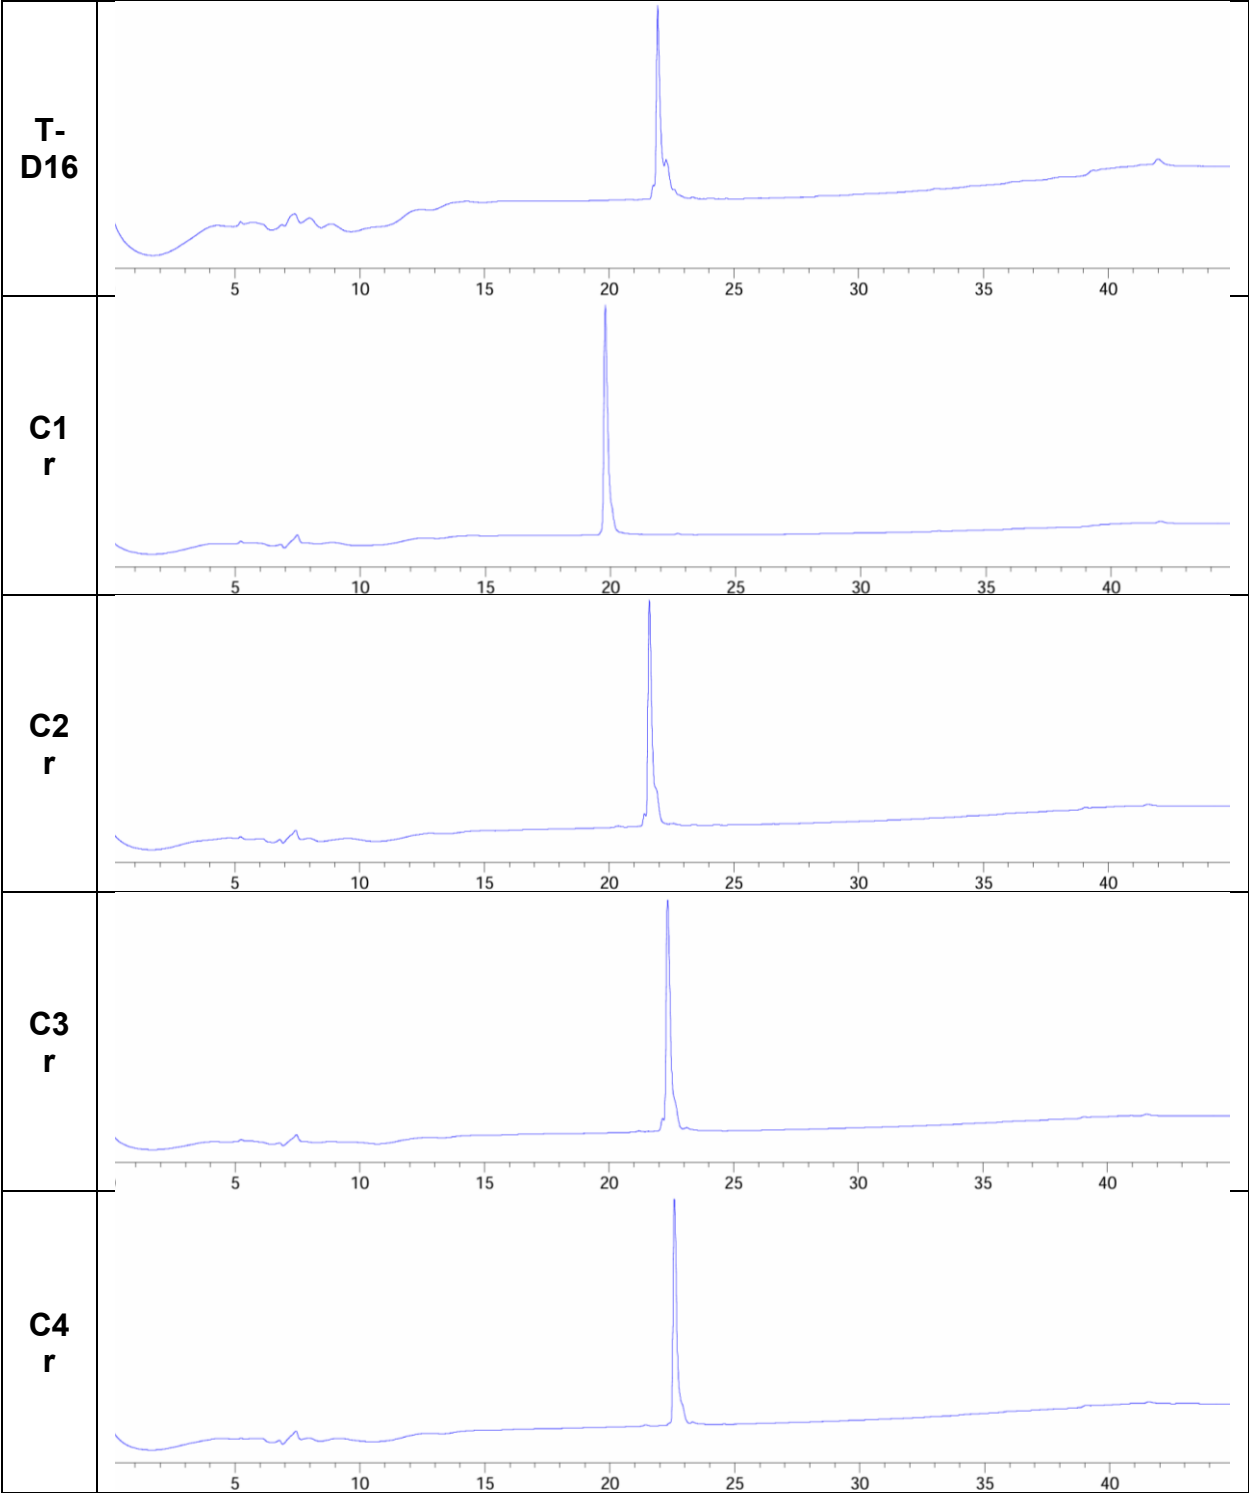

**Figure S4. Analytical HPLC chromatograms for all peptides (continued)**

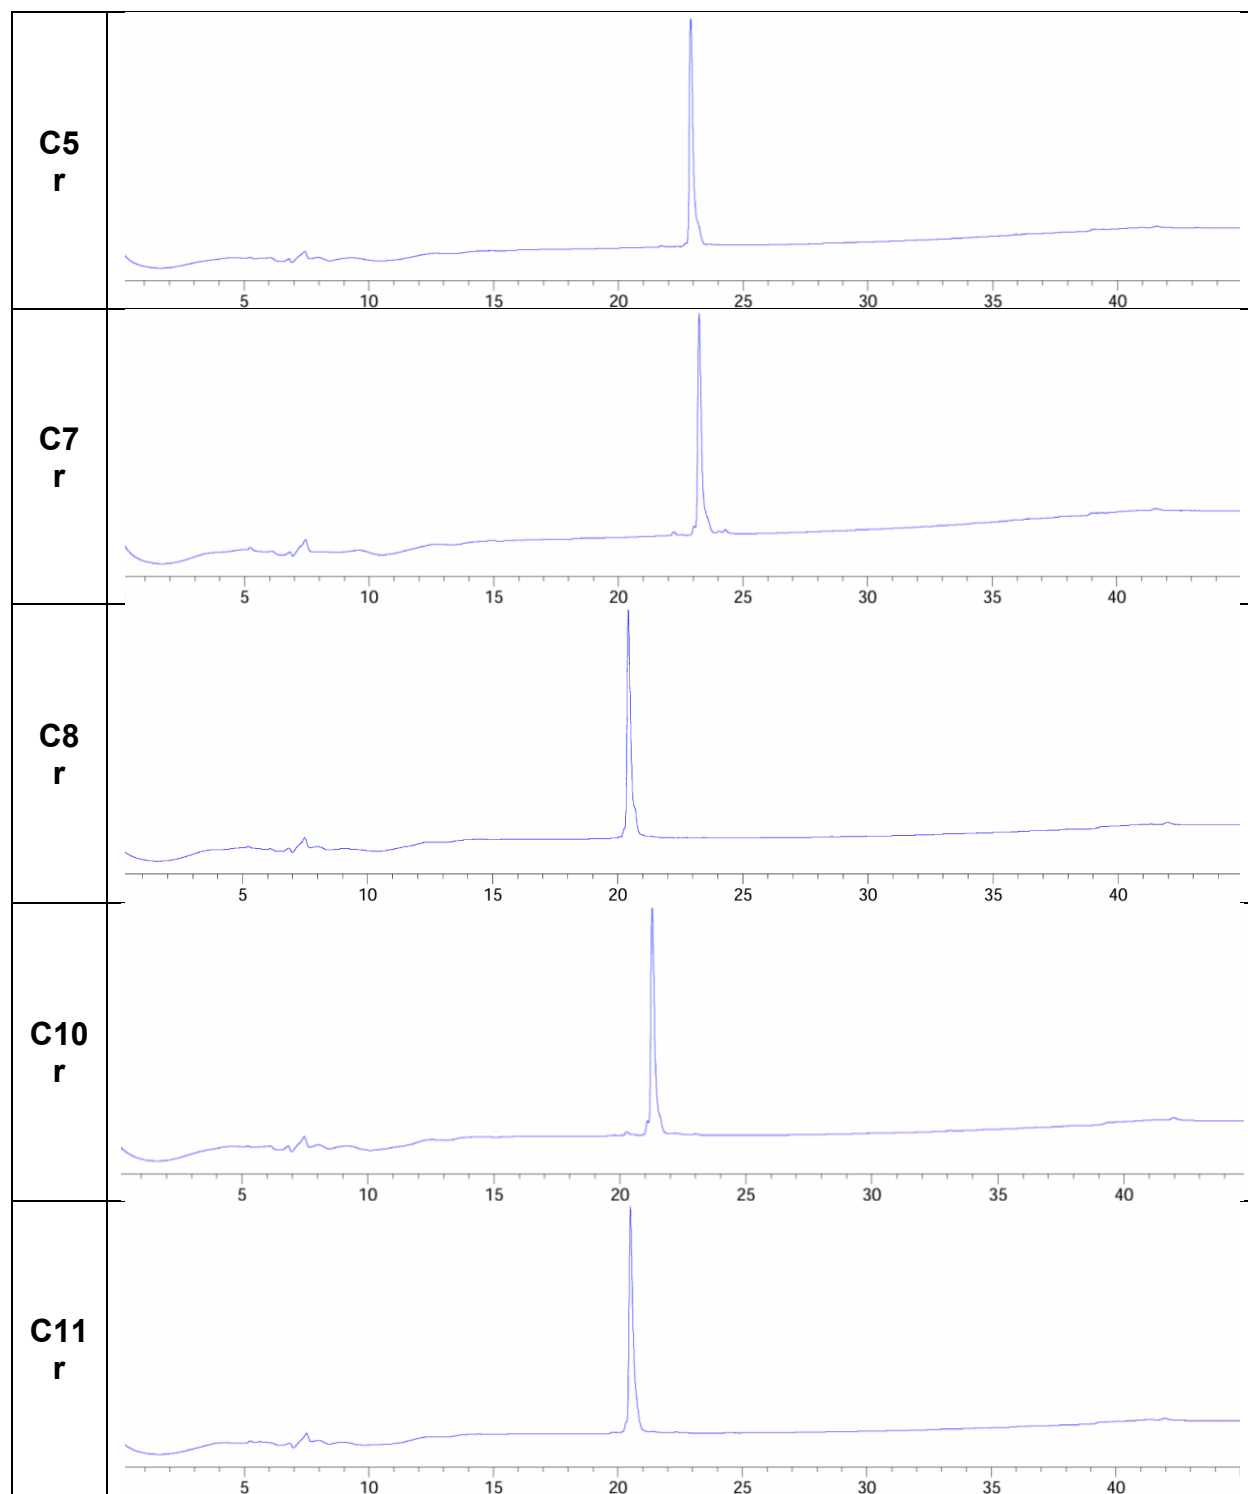

**Figure S4. Analytical HPLC chromatograms for all peptides (continued)**

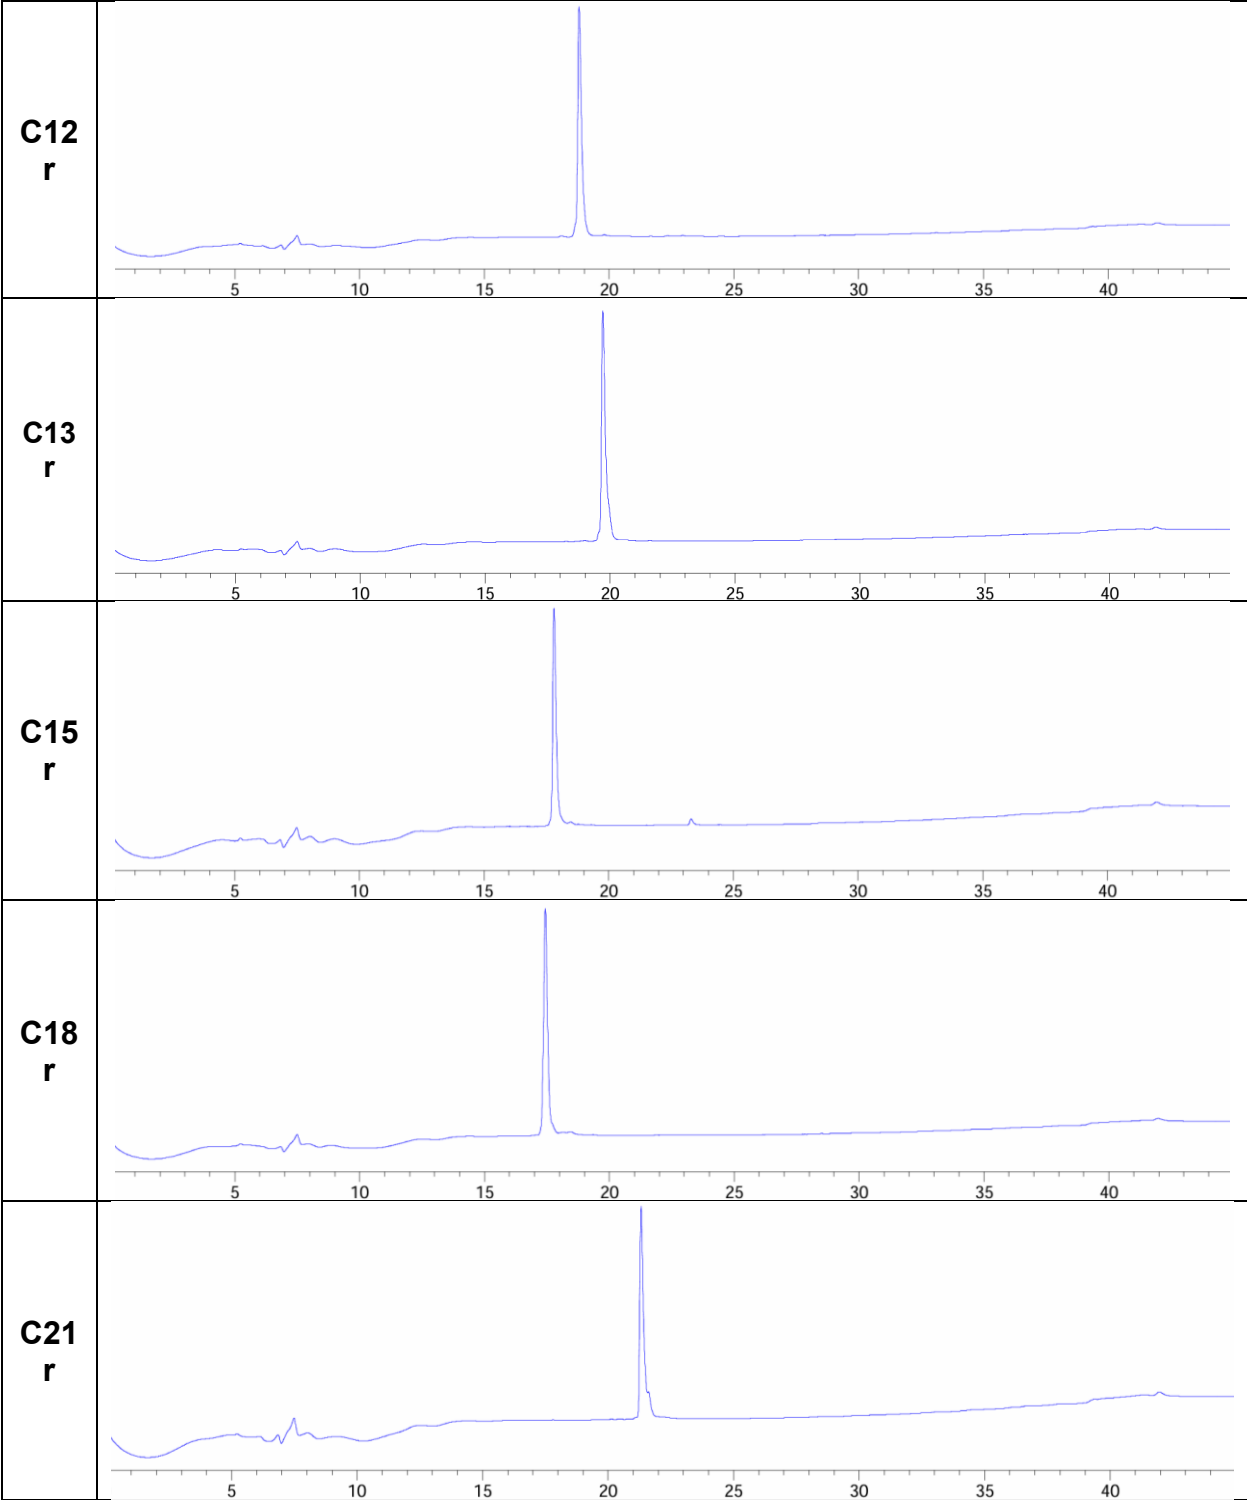

**Figure S4. Analytical HPLC chromatograms for all peptides (continued)**

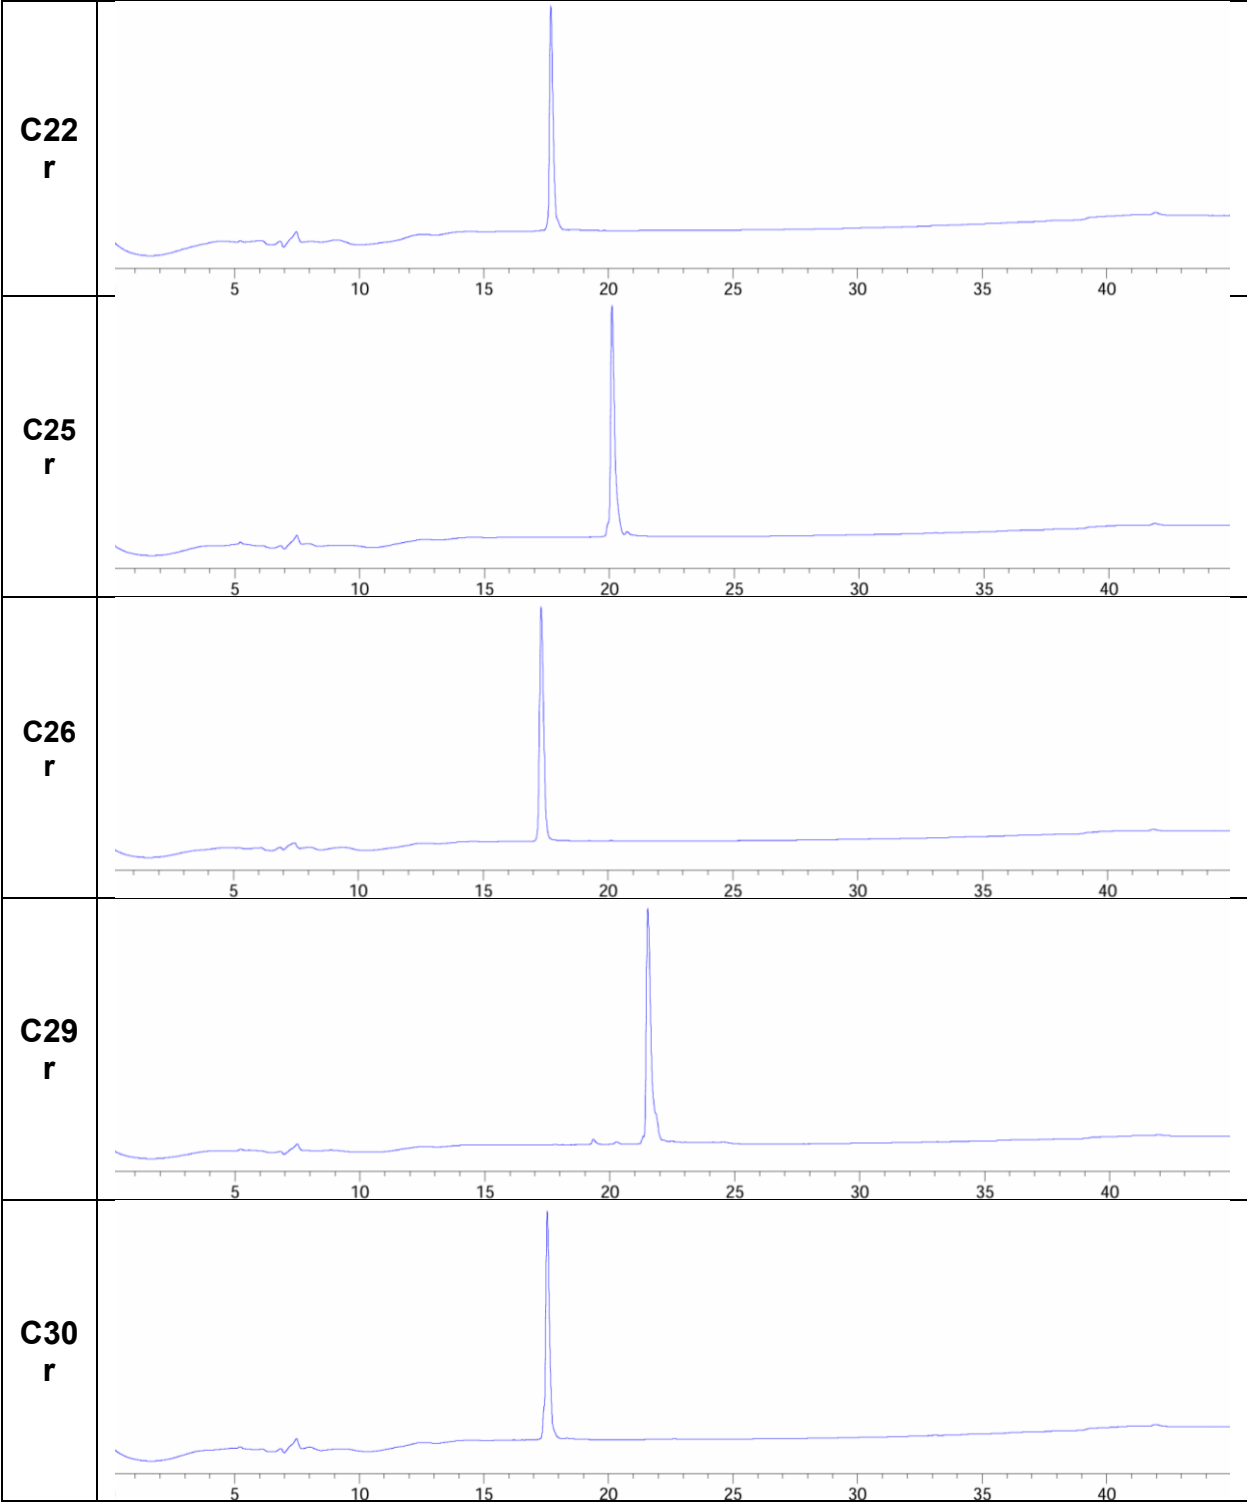

**Figure S4. Analytical HPLC chromatograms for all peptides (continued)**

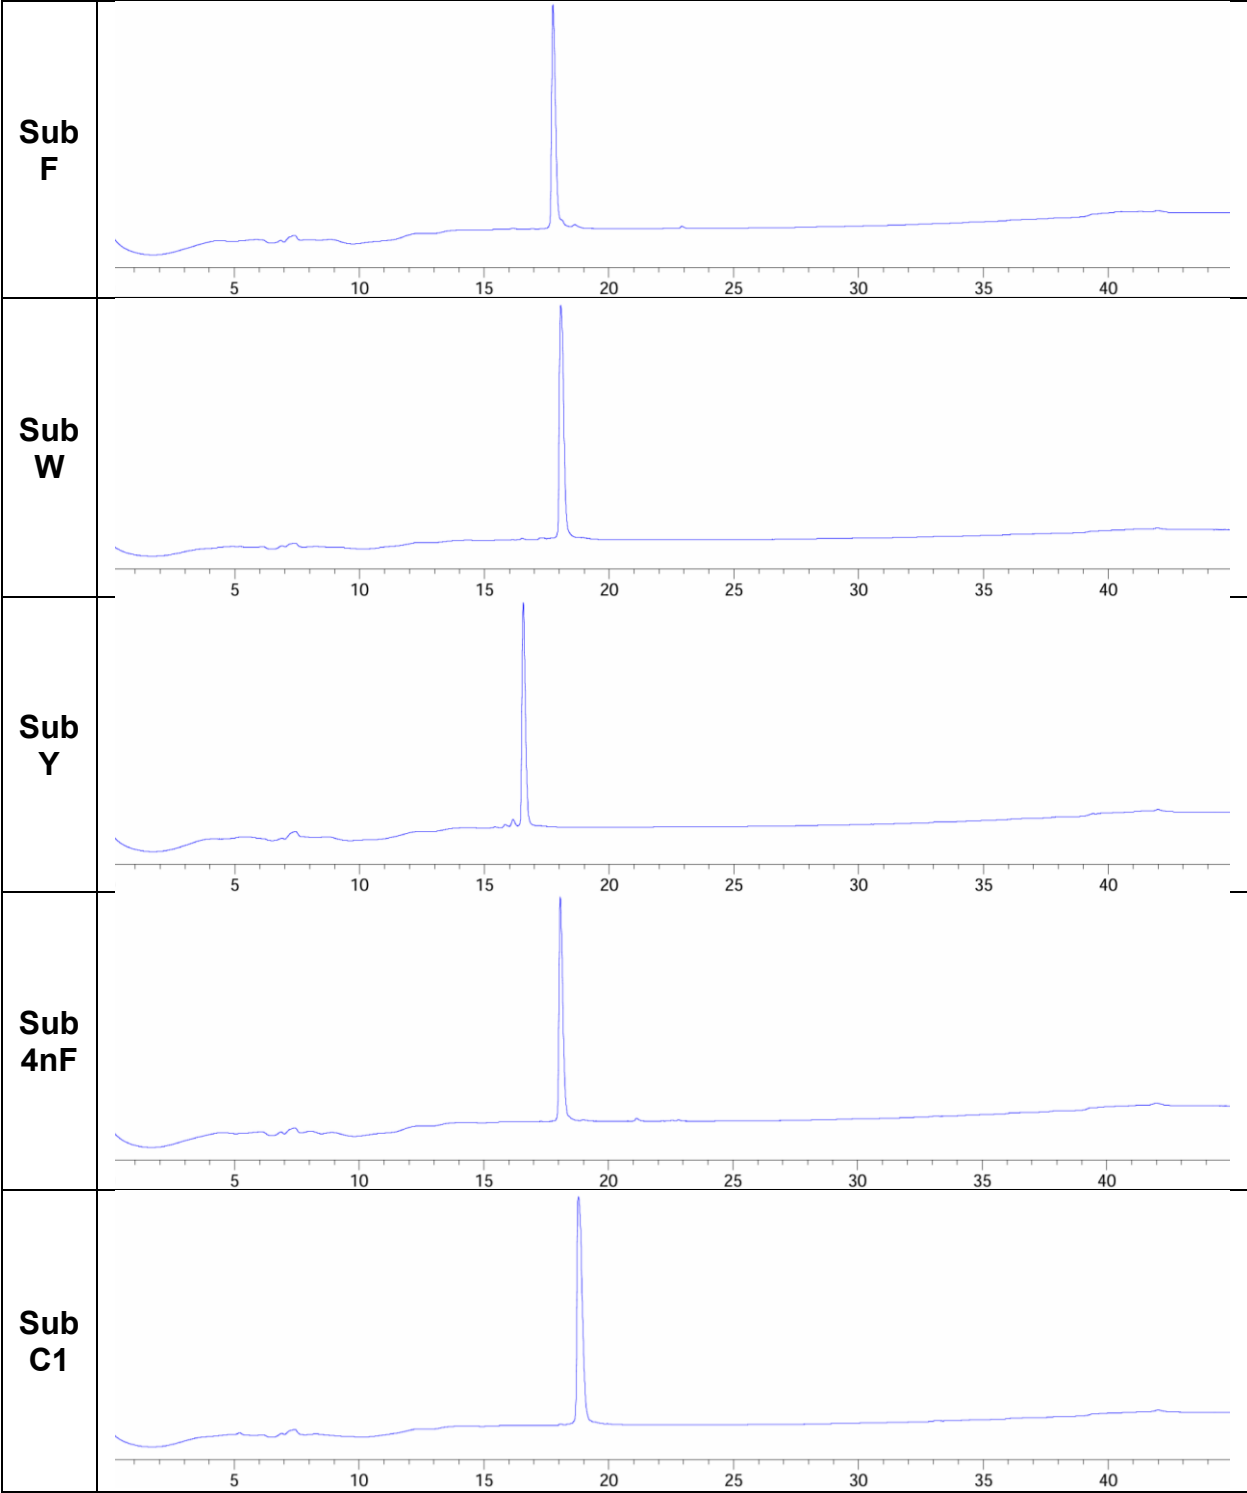

Figure S4. Analytical HPLC chromatograms for all peptides (continued)

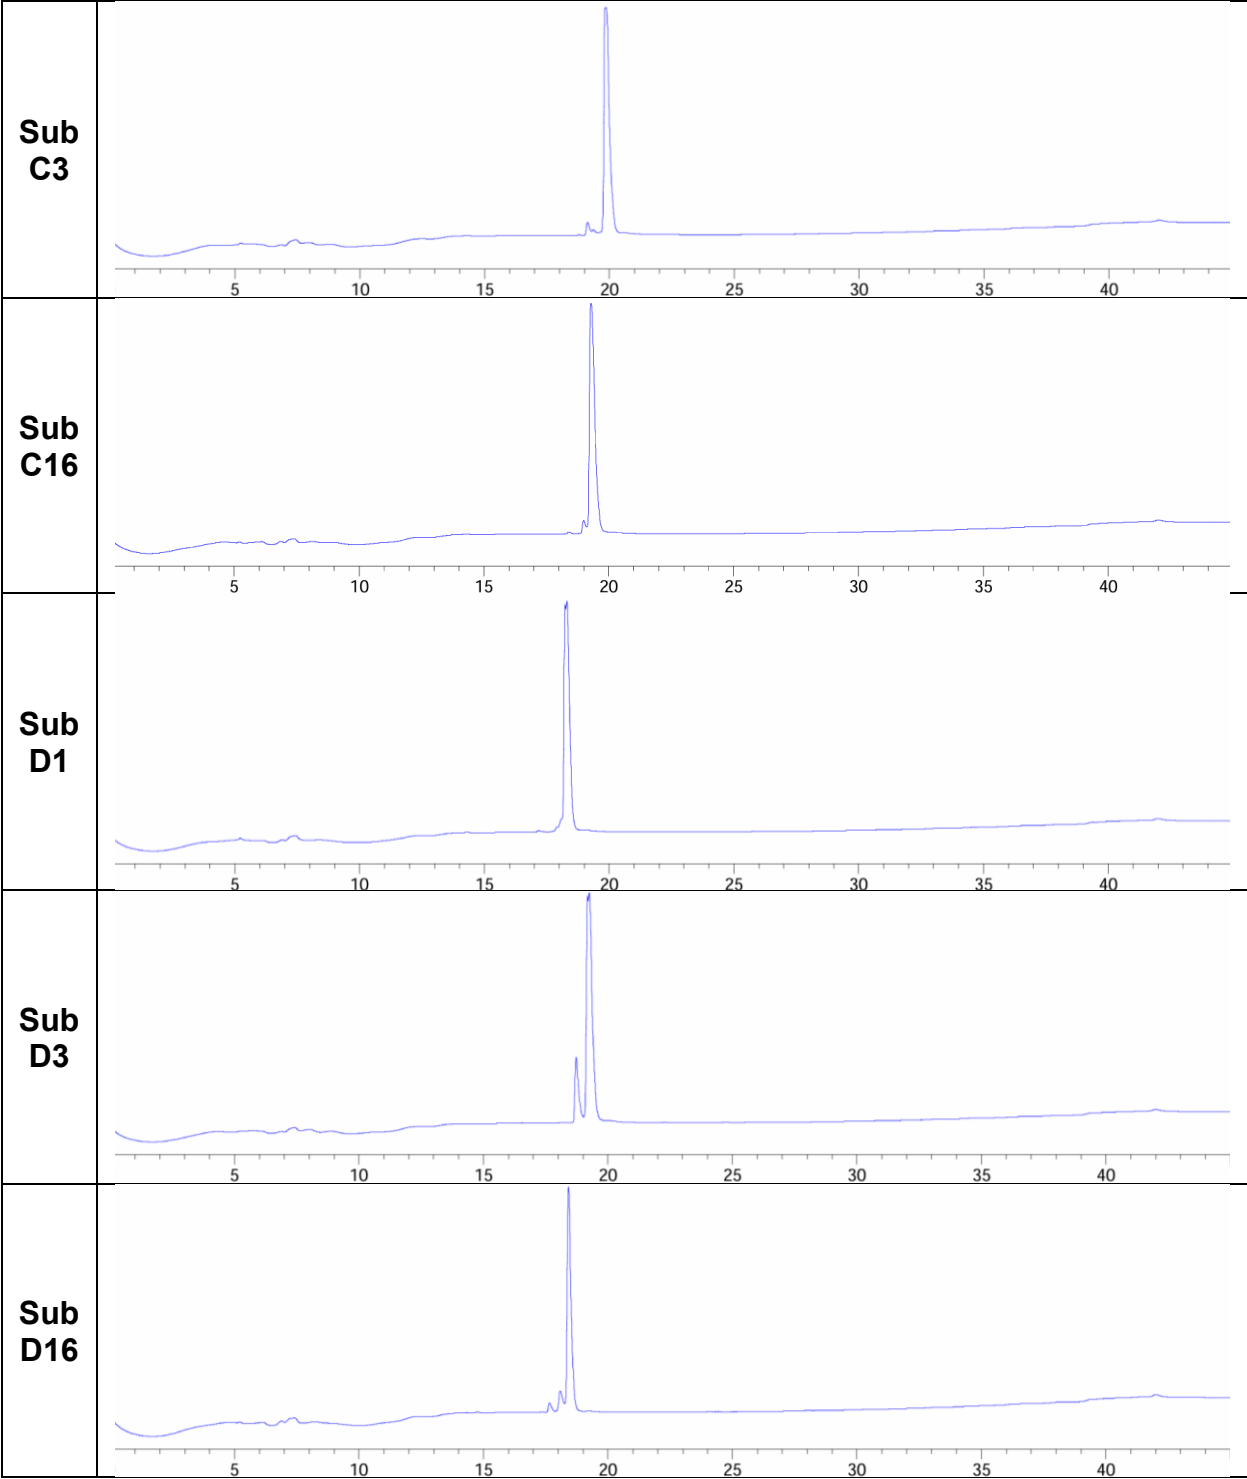

**Figure S4. Analytical HPLC chromatograms for all peptides (continued)**

**C1**

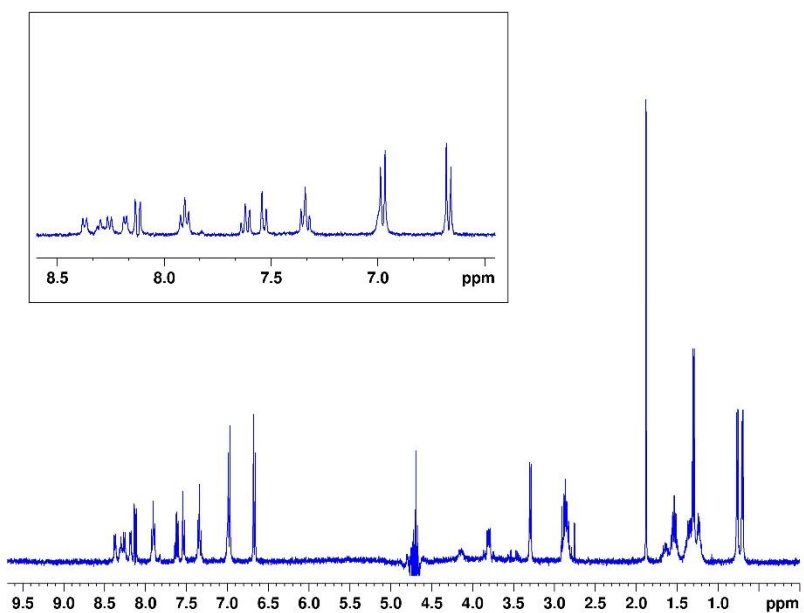

**C2**

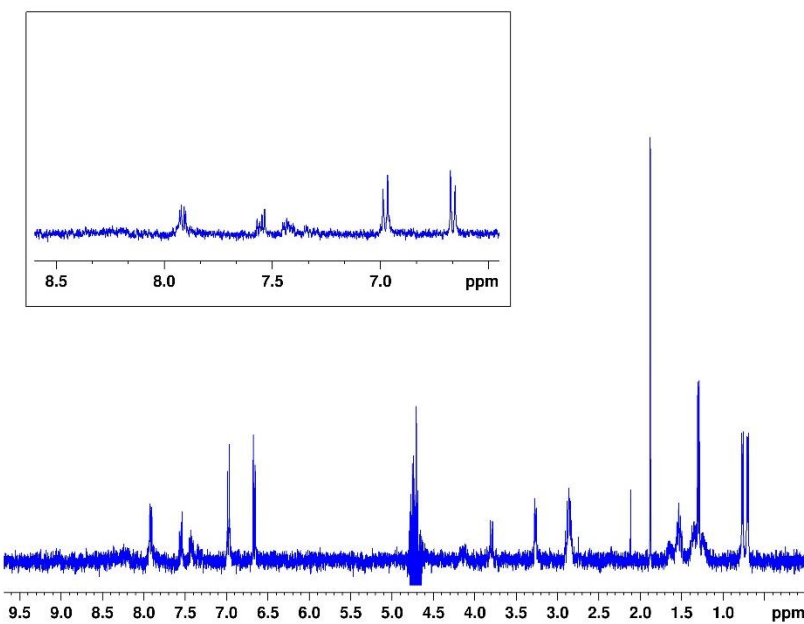

**Figure S5. NMR spectra for nitroarylated model peptides**

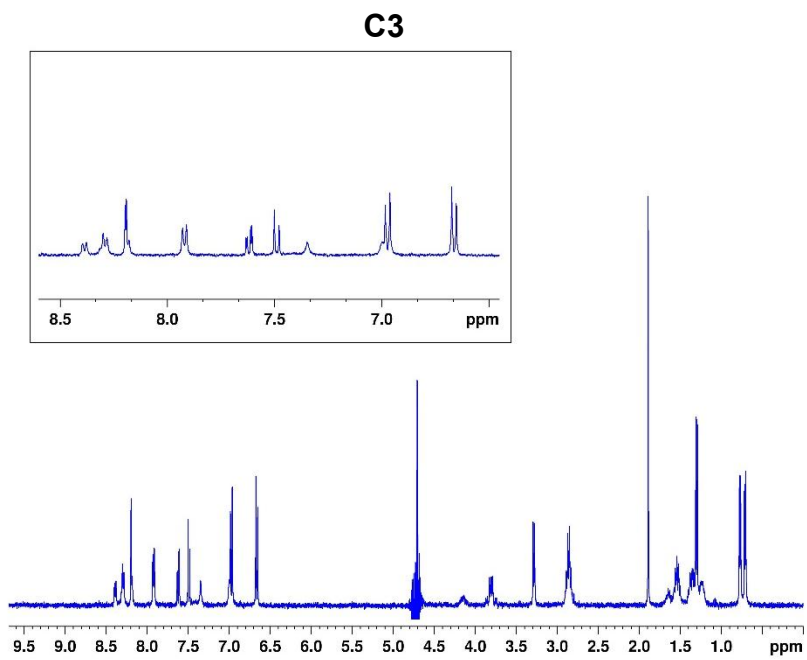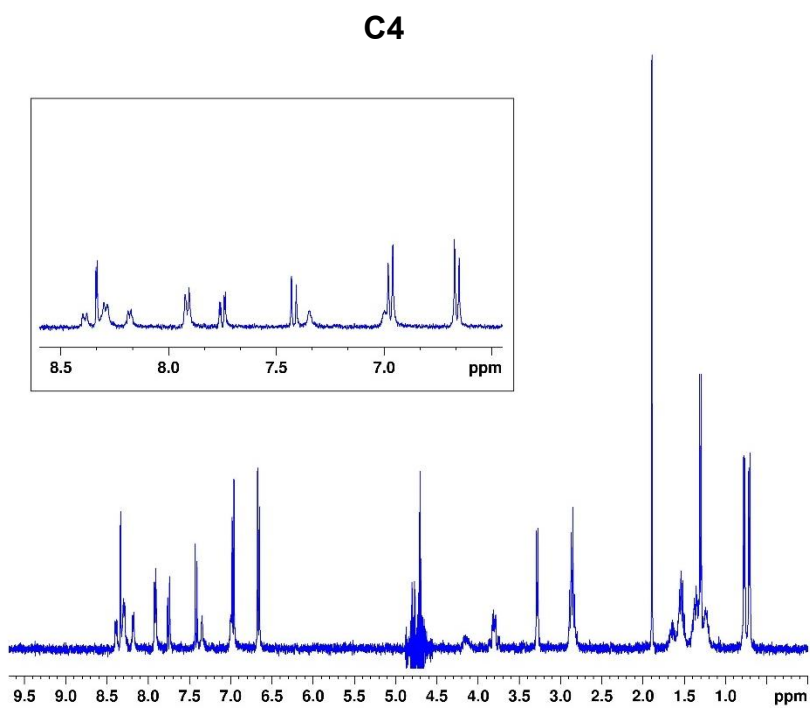

**Figure S5. NMR spectra for nitroarylated model peptides (continued)**

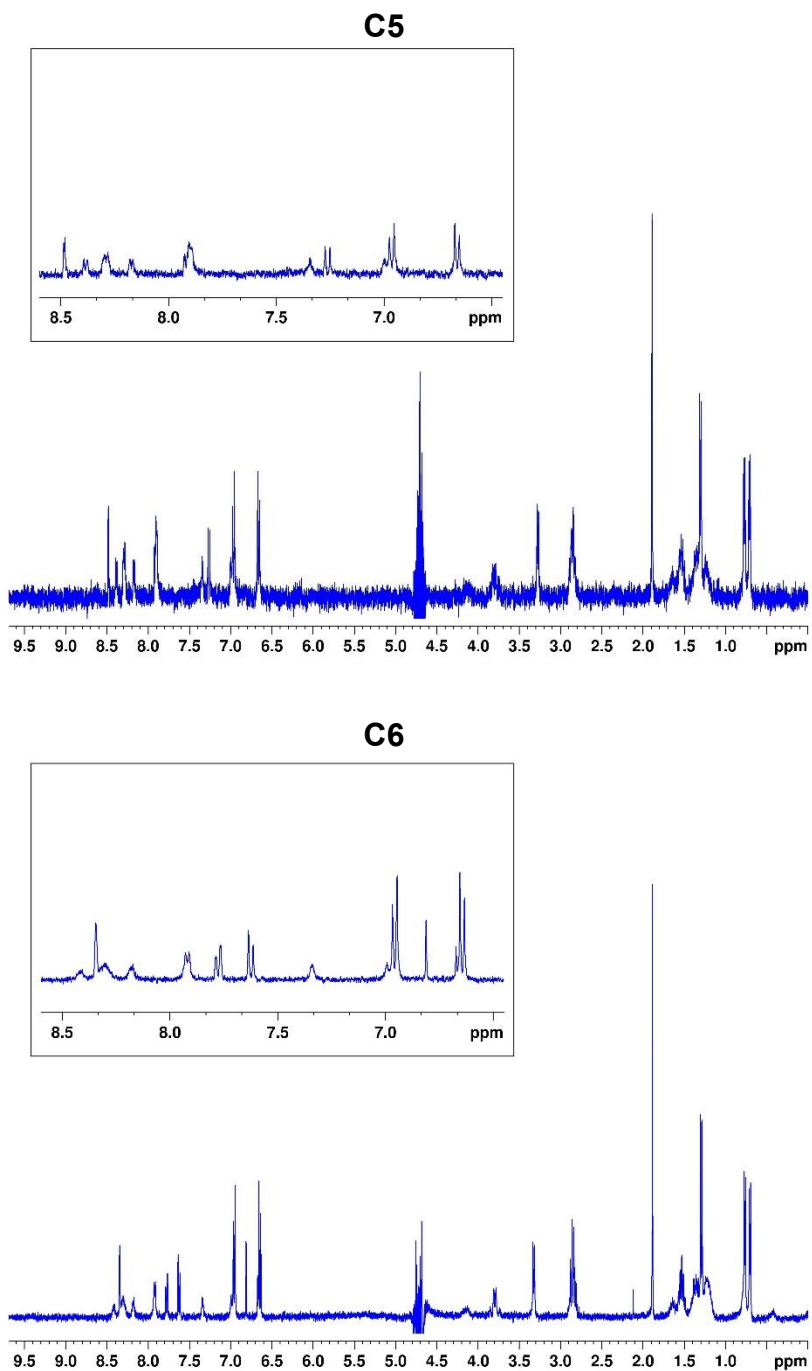

**Figure S5. NMR spectra for nitroarylated model peptides (continued)**

**C7**

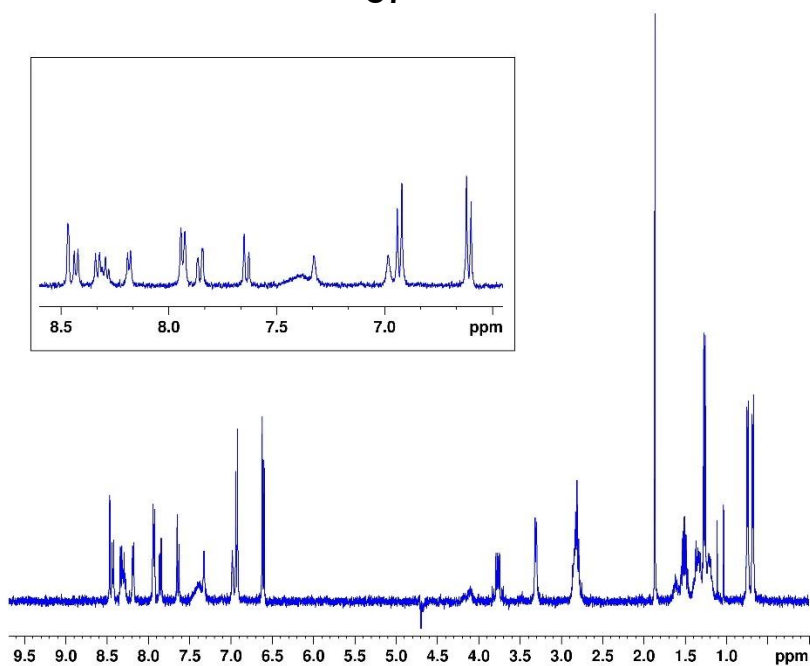

**C8**

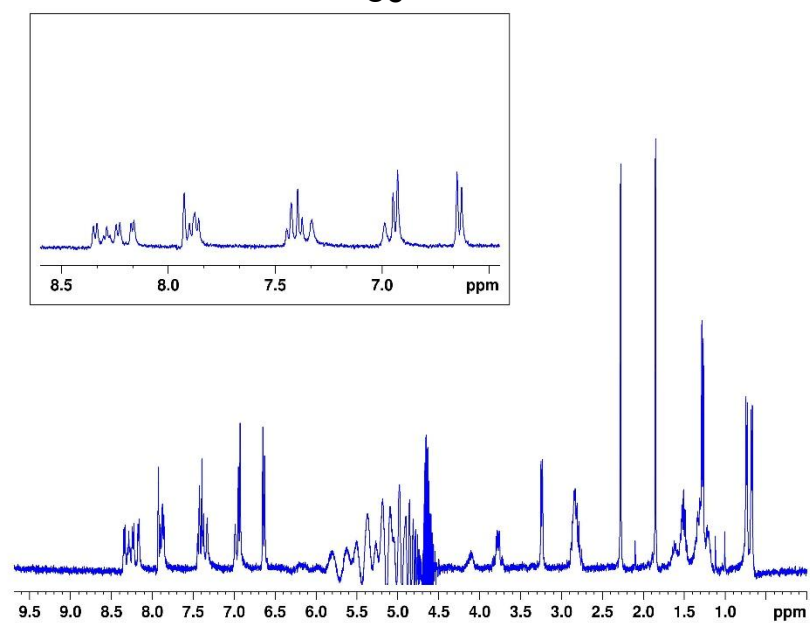

**Figure S5. NMR spectra for nitroarylated model peptides (continued)**

**C9**

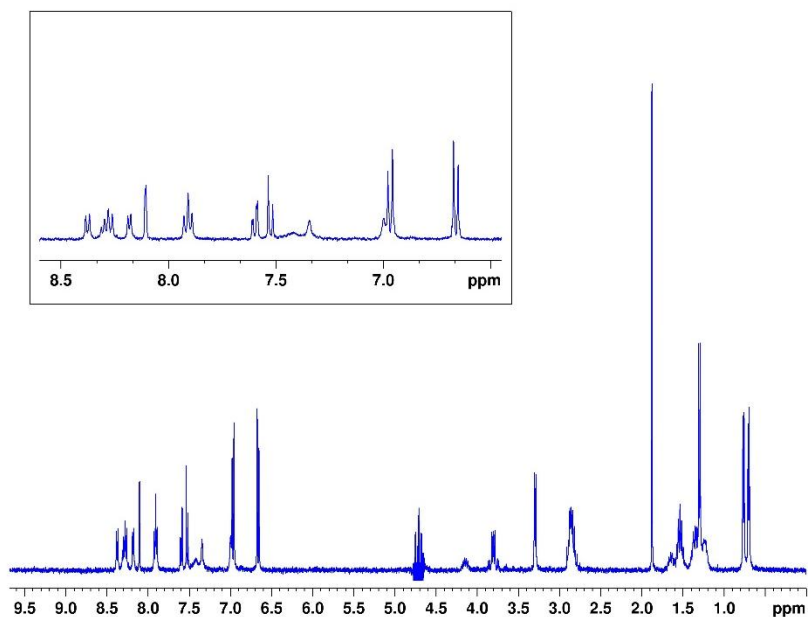

**C10**

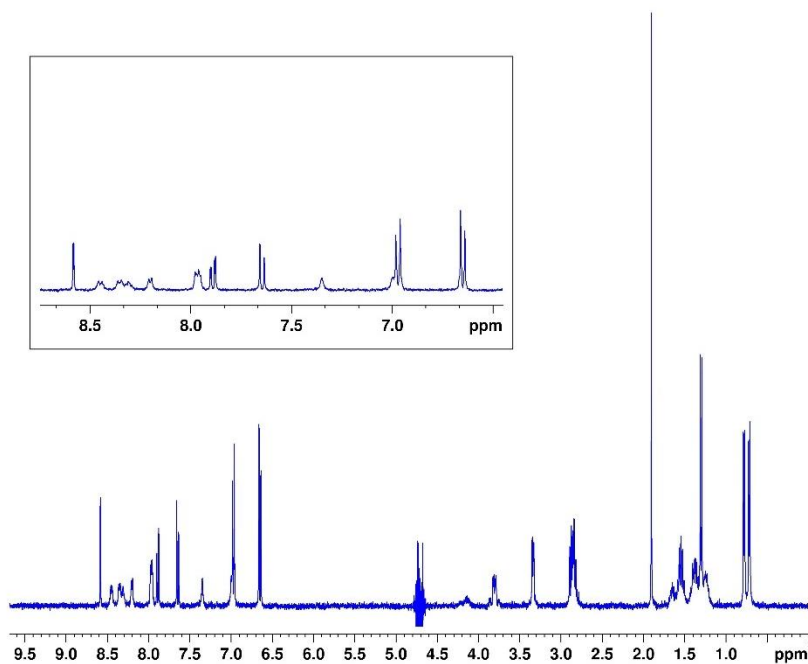

**Figure S5. NMR spectra for nitroarylated model peptides (continued)**

**C11**

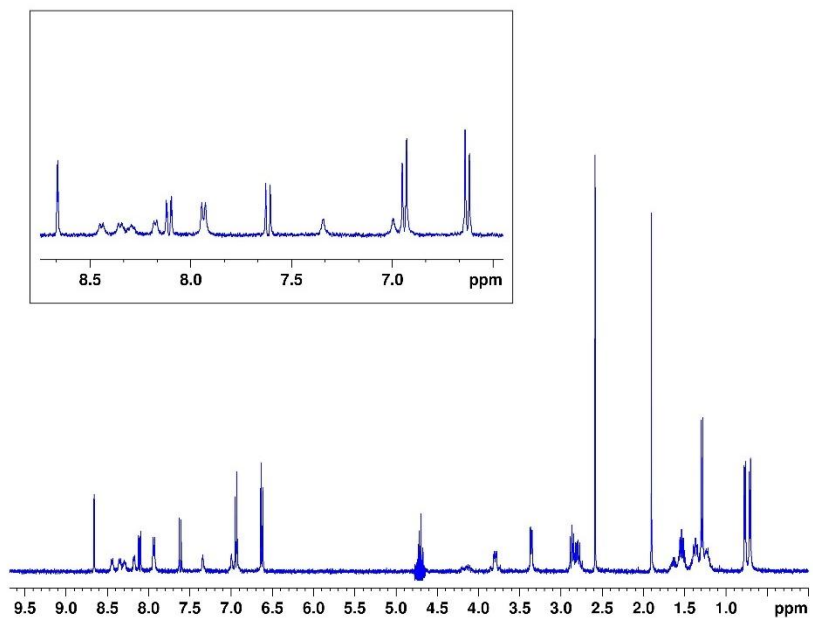

**C12**

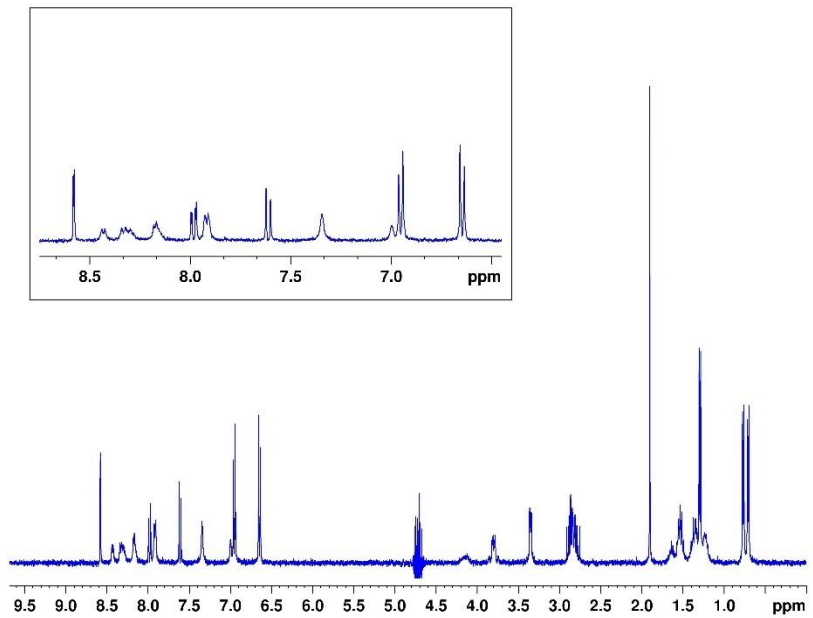

**Figure S5. NMR spectra for nitroarylated model peptides (continued)**

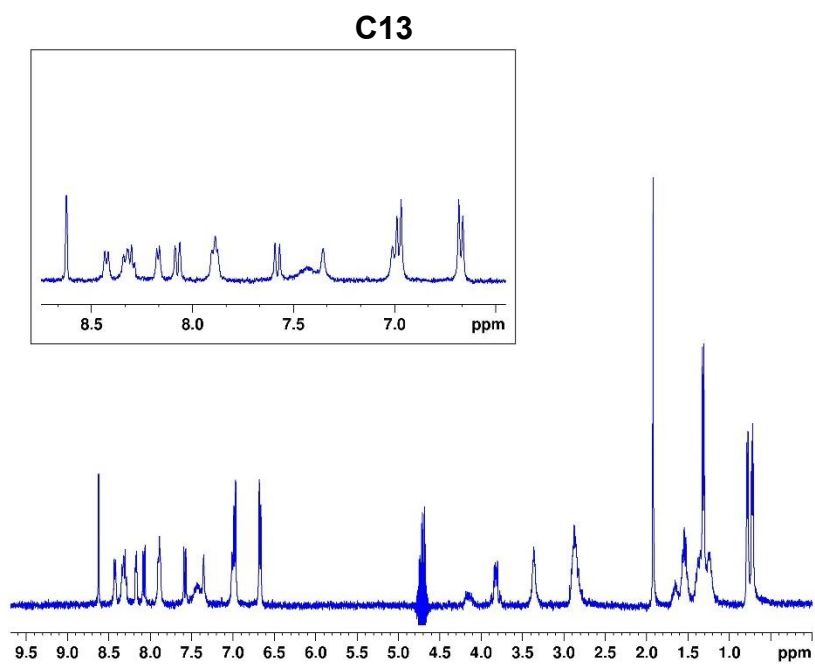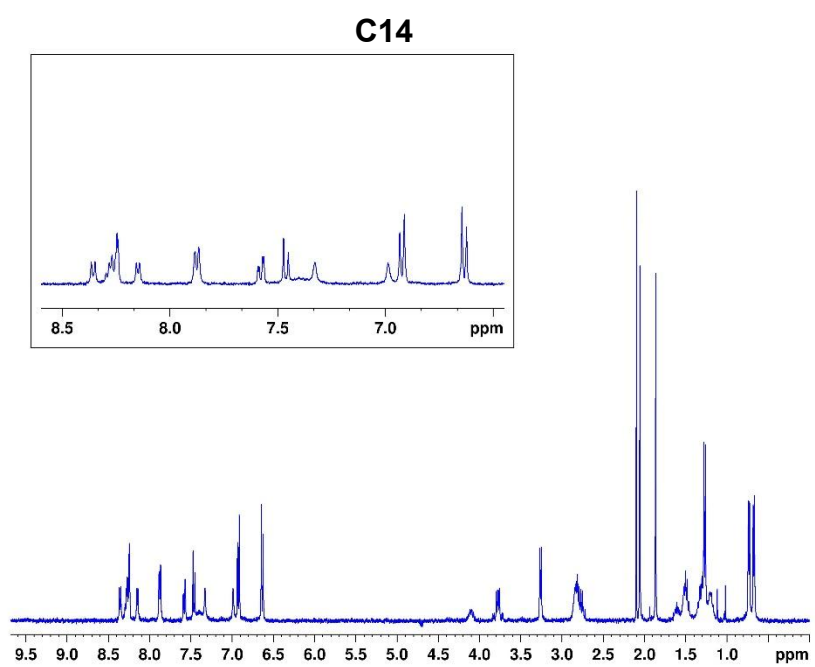

**Figure S5. NMR spectra for nitroarylated model peptides (continued)**

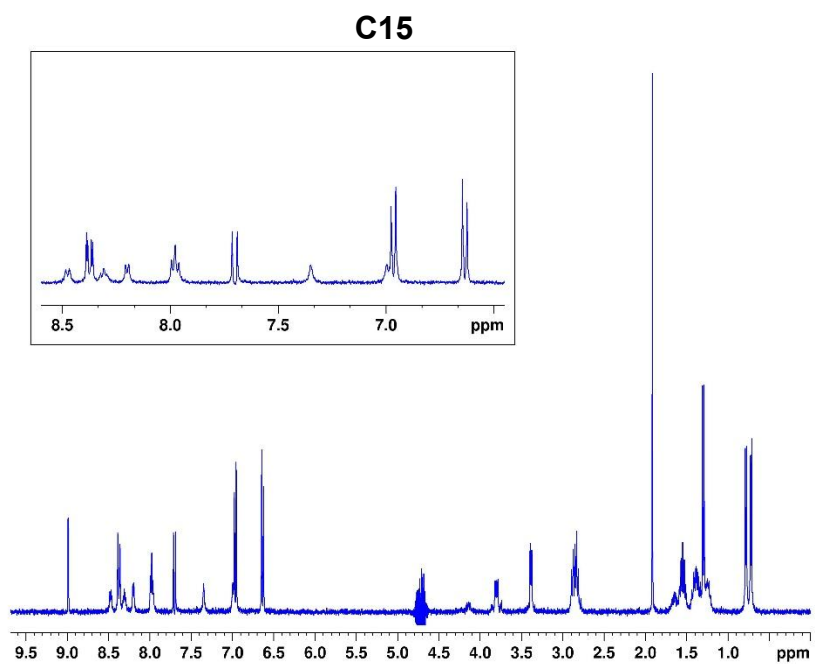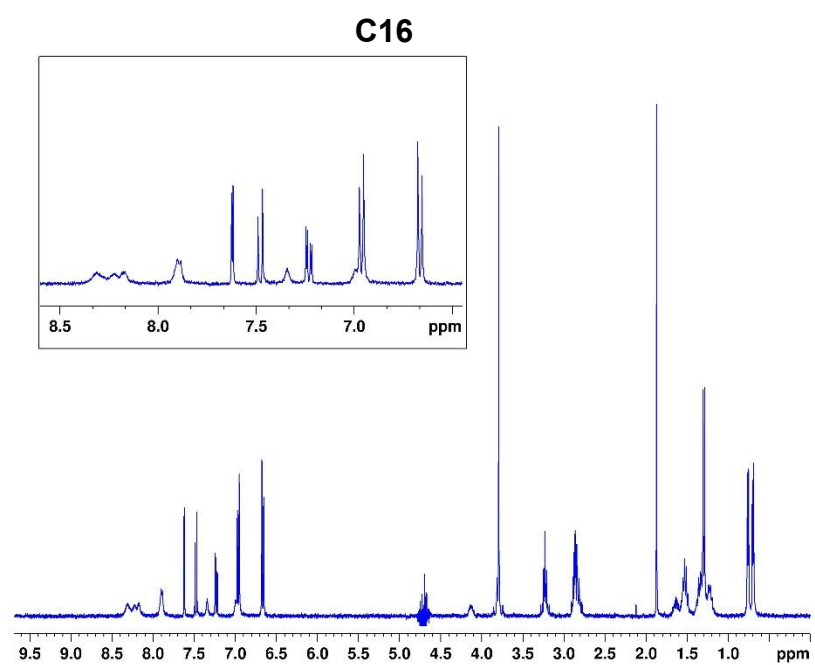

**Figure S5. NMR spectra for nitroarylated model peptides (continued)**

**C17**

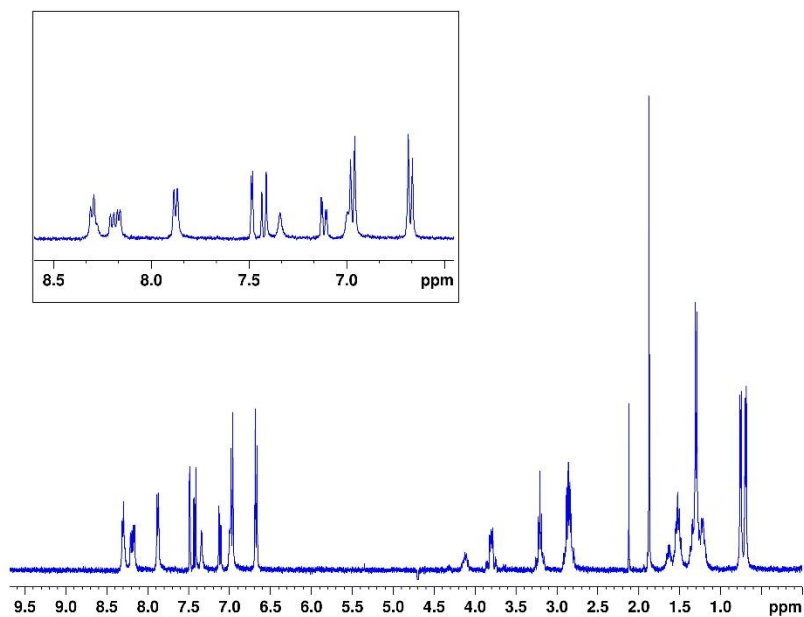

**C18**

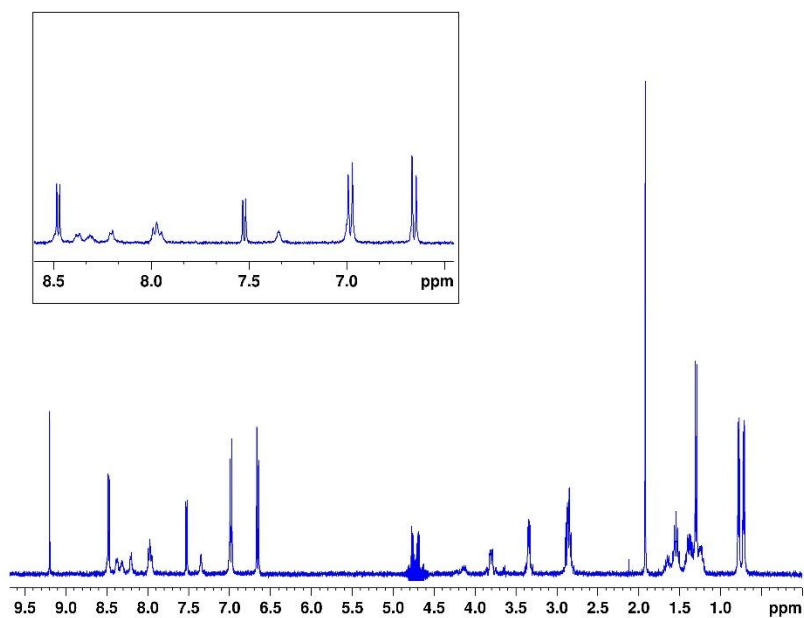

**Figure S5. NMR spectra for nitroarylated model peptides (continued)**

**C19**

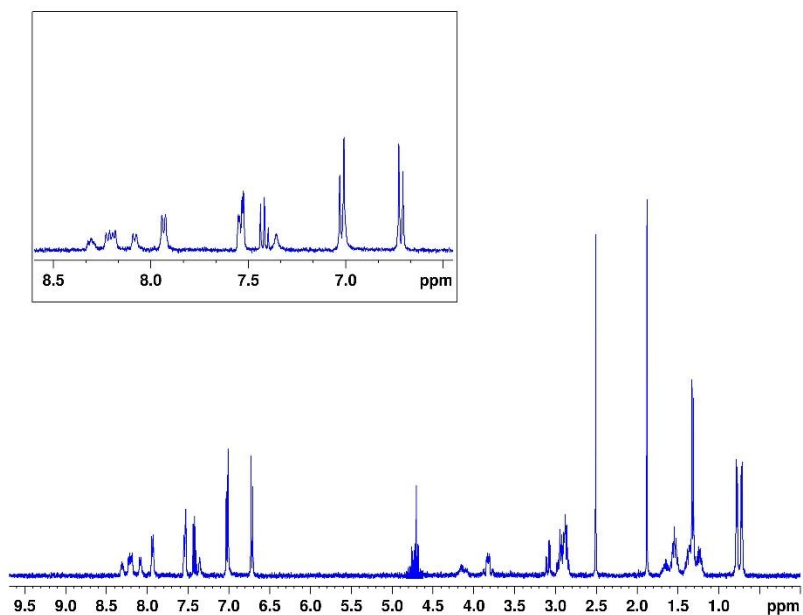

**C20**

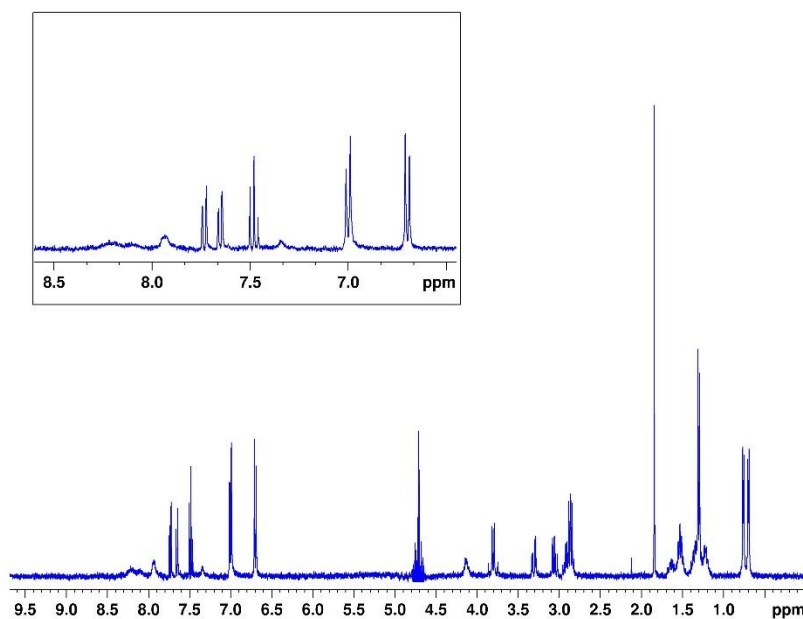

**Figure S5. NMR spectra for nitroarylated model peptides (continued)**

**C21**

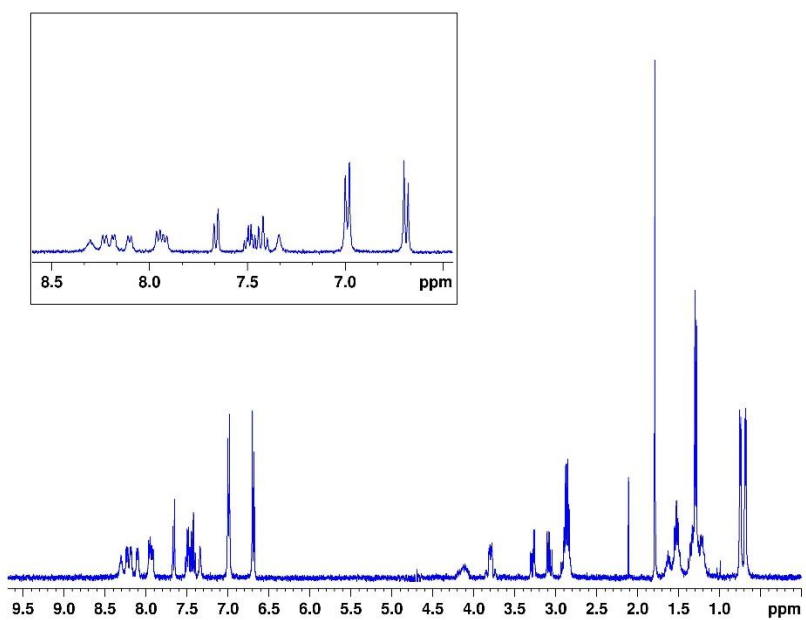

**C22**

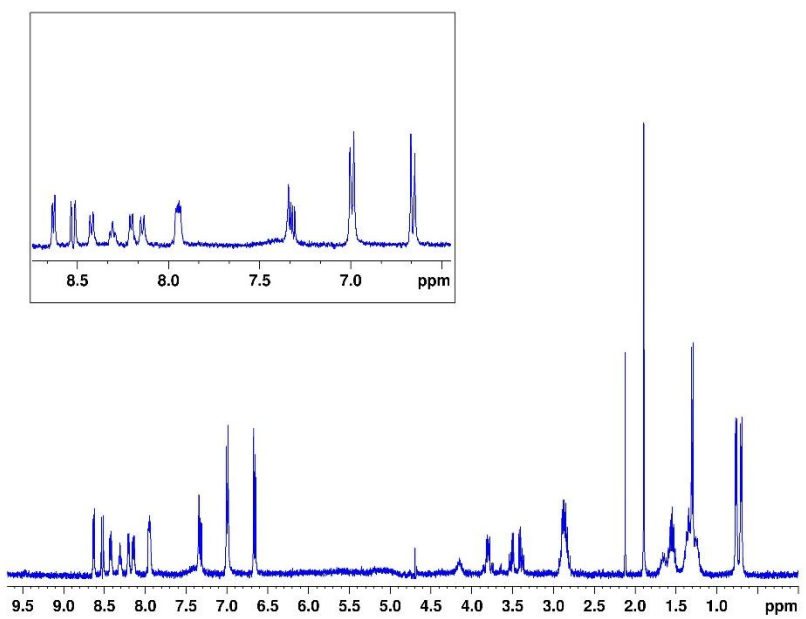

**Figure S5. NMR spectra for nitroarylated model peptides (continued)**

**C23**

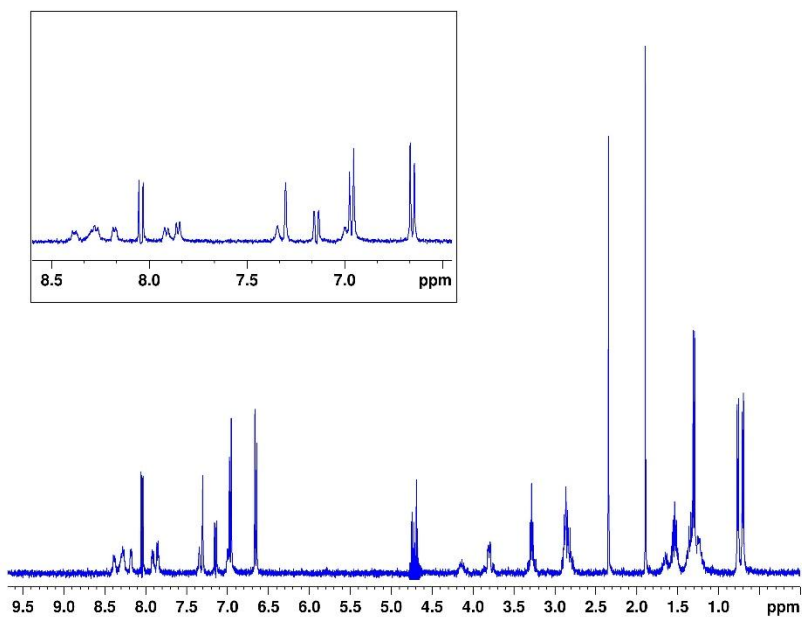

**C24**

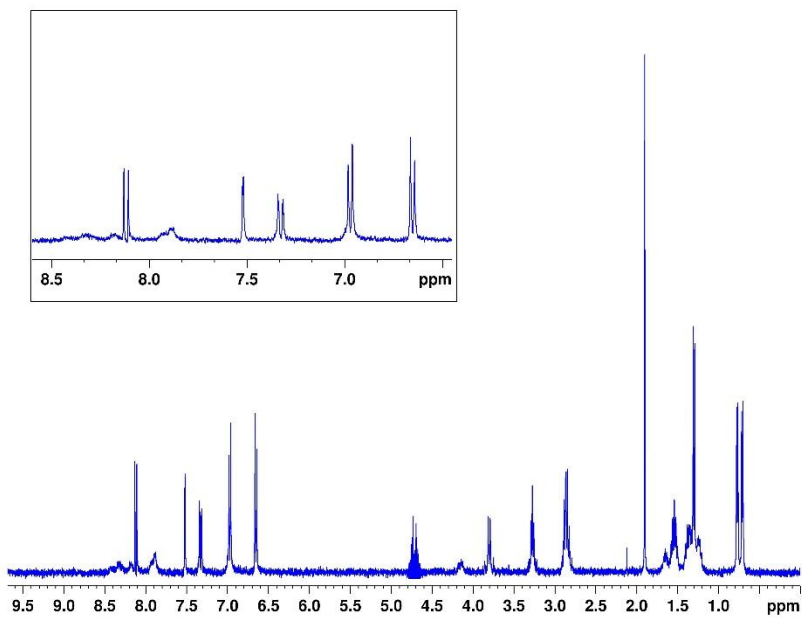

**Figure S5. NMR spectra for nitroarylated model peptides (continued)**

**C25**

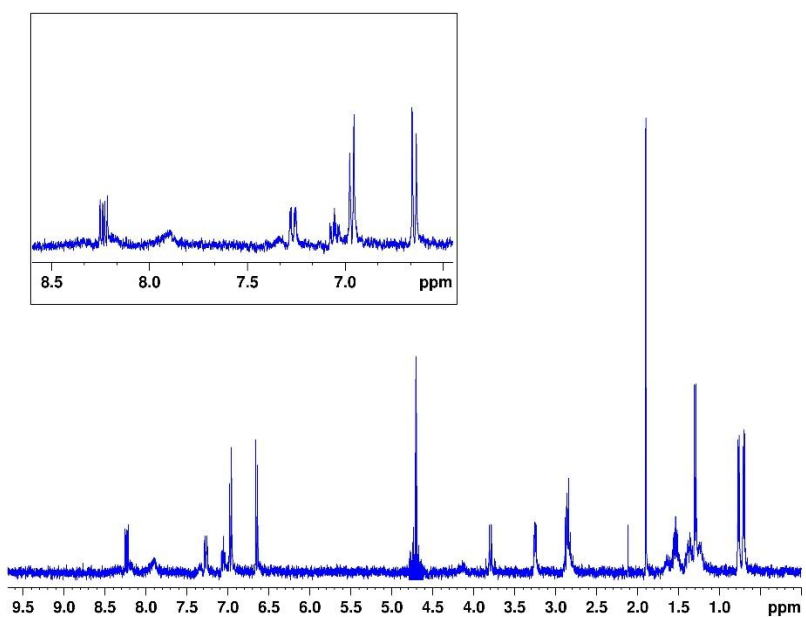

**C26**

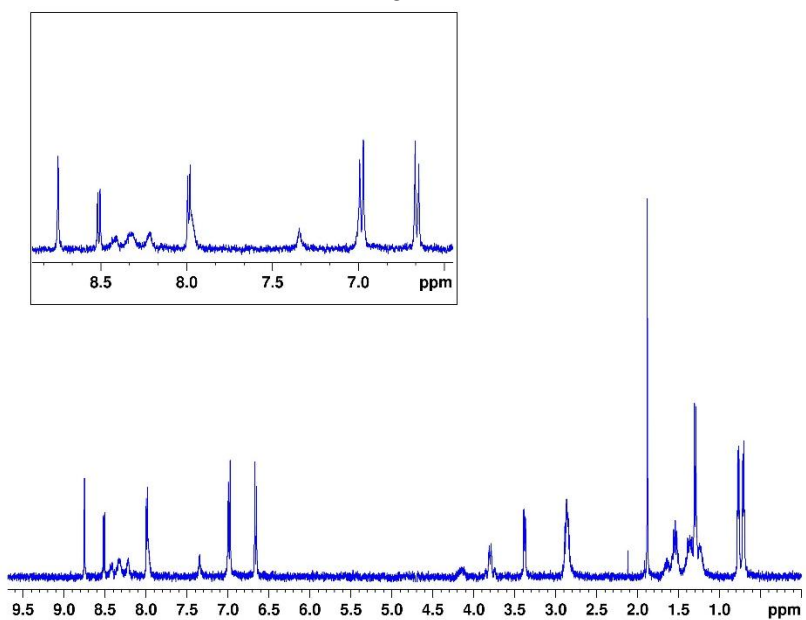

**Figure S5. NMR spectra for nitroarylated model peptides (continued)**

**C28**

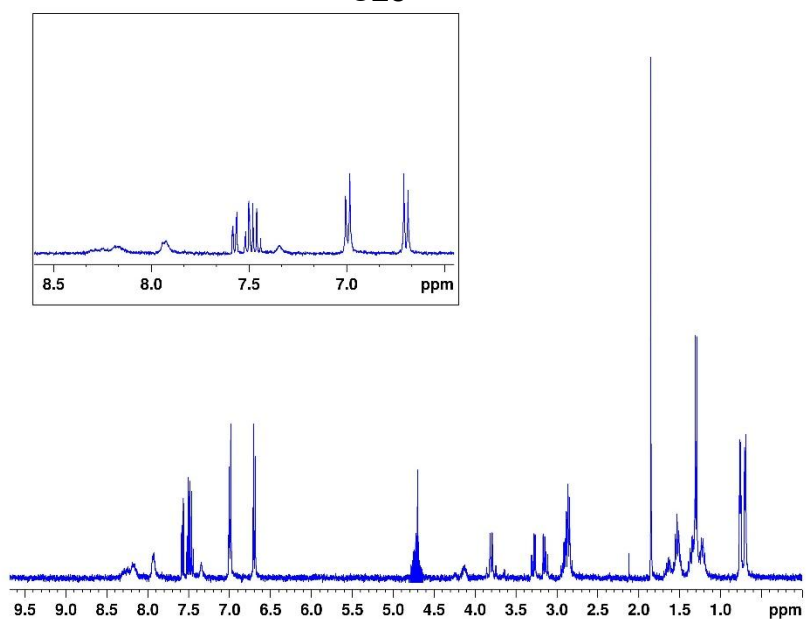

**C29**

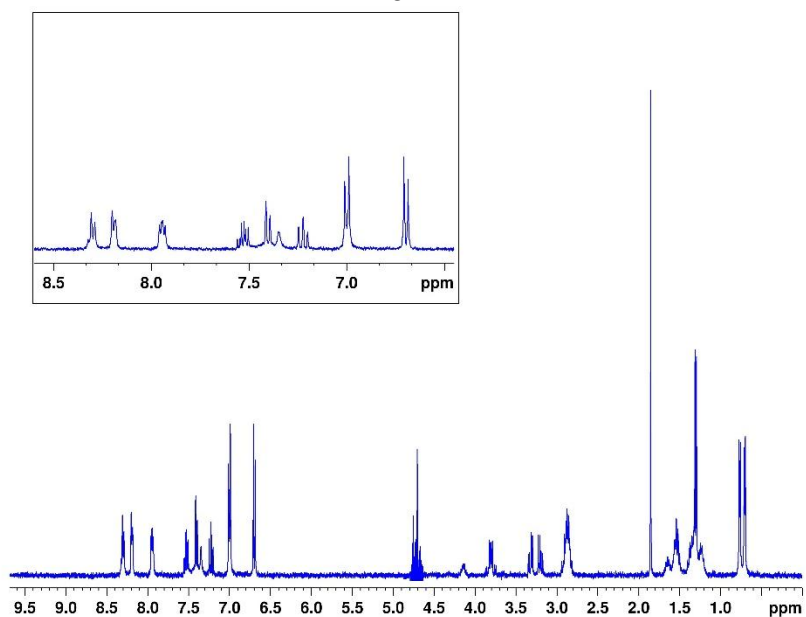

**Figure S5. NMR spectra for nitroarylated model peptides (continued)**

**C30**

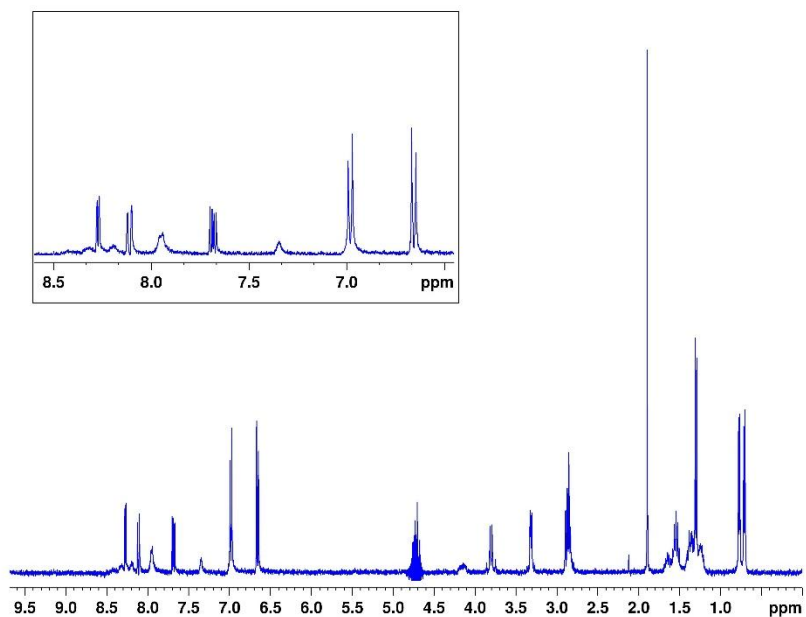

**C31**

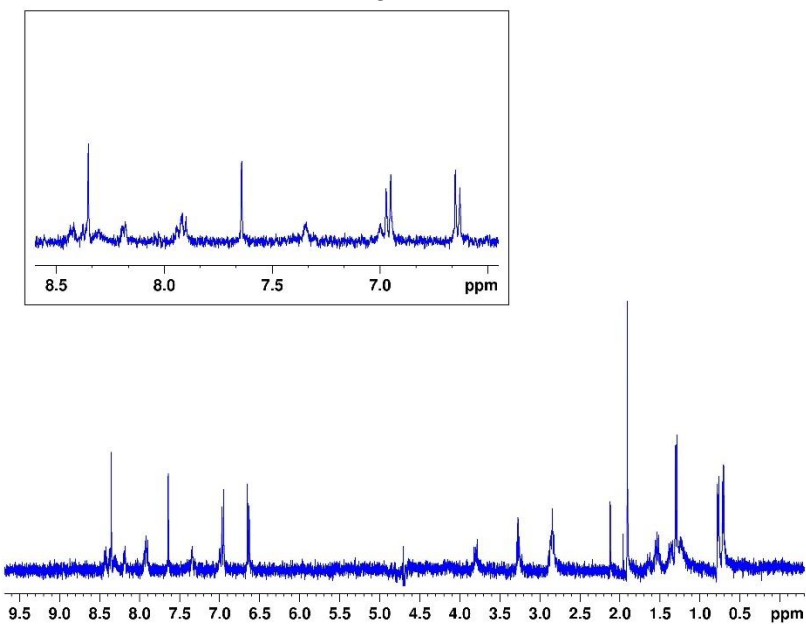

**Figure S5. NMR spectra for nitroarylated model peptides (continued)**

**C32**

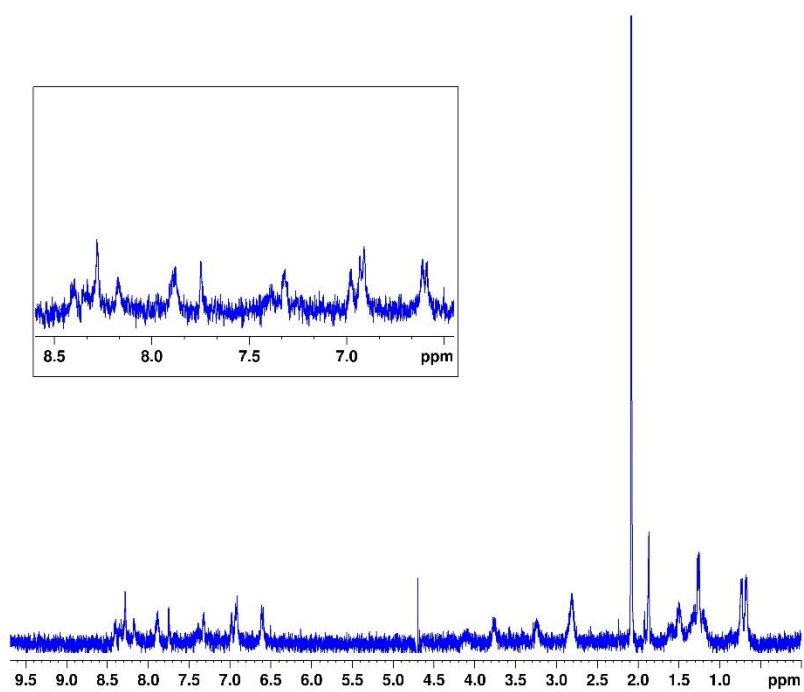

**C33**

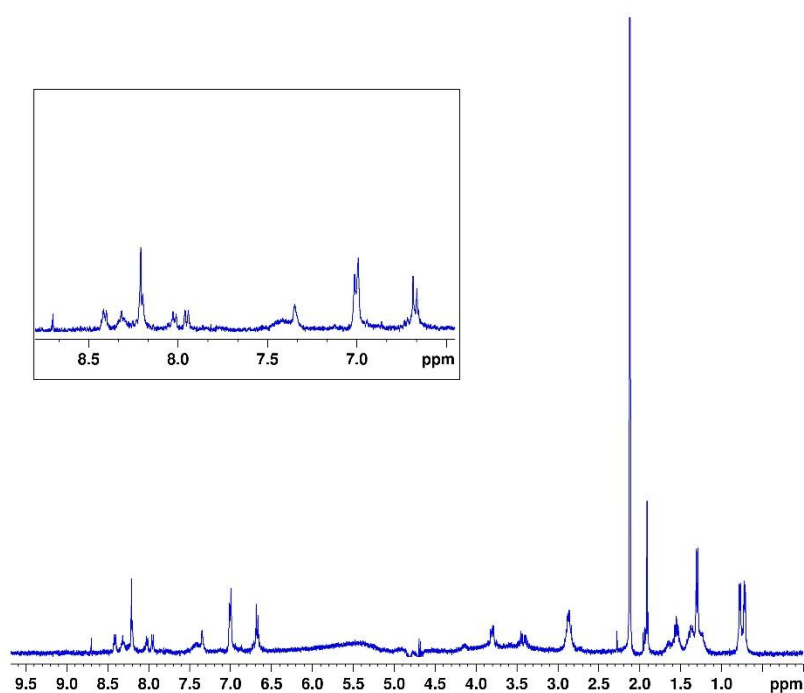

**Figure S5. NMR spectra for nitroarylated model peptides (continued)**

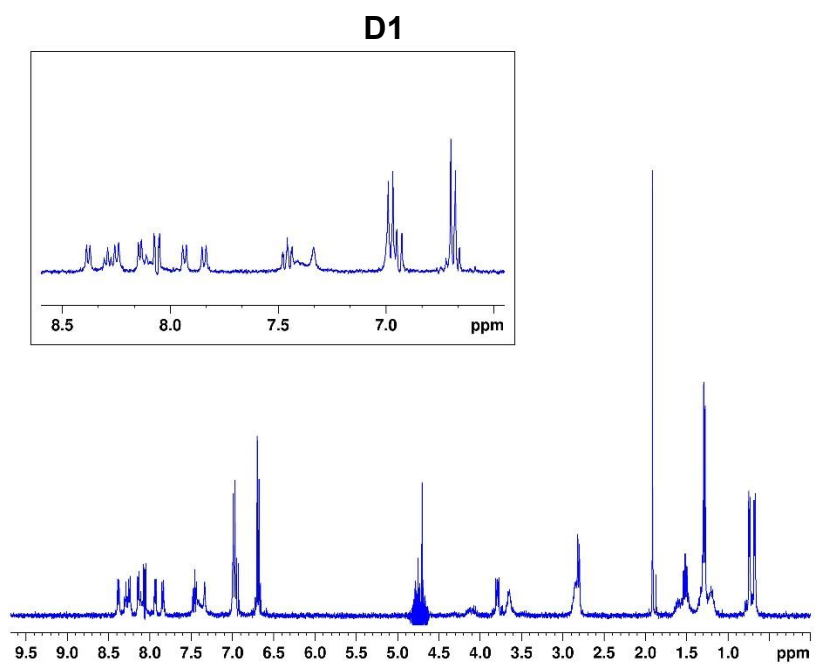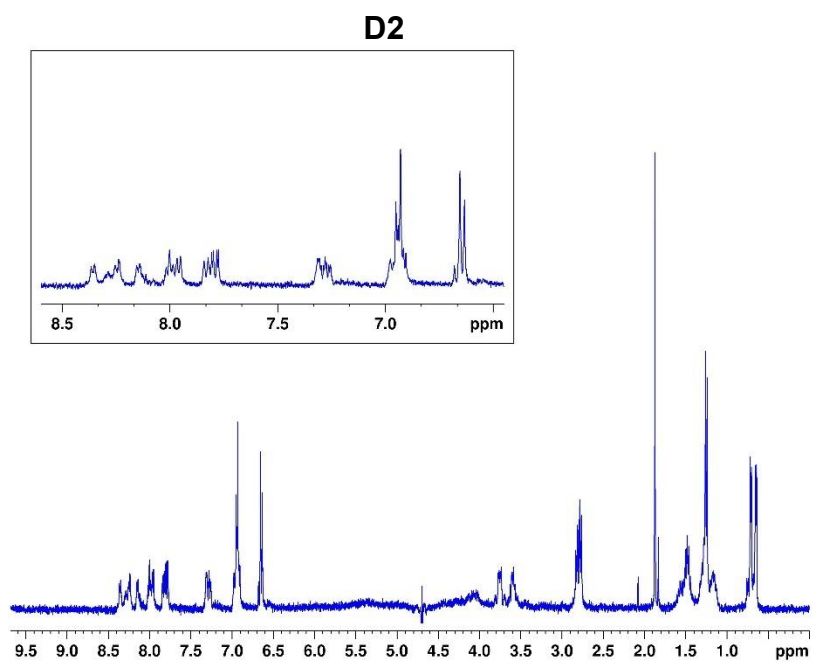

**Figure S5. NMR spectra for nitroarylated model peptides (continued)**

**D3**

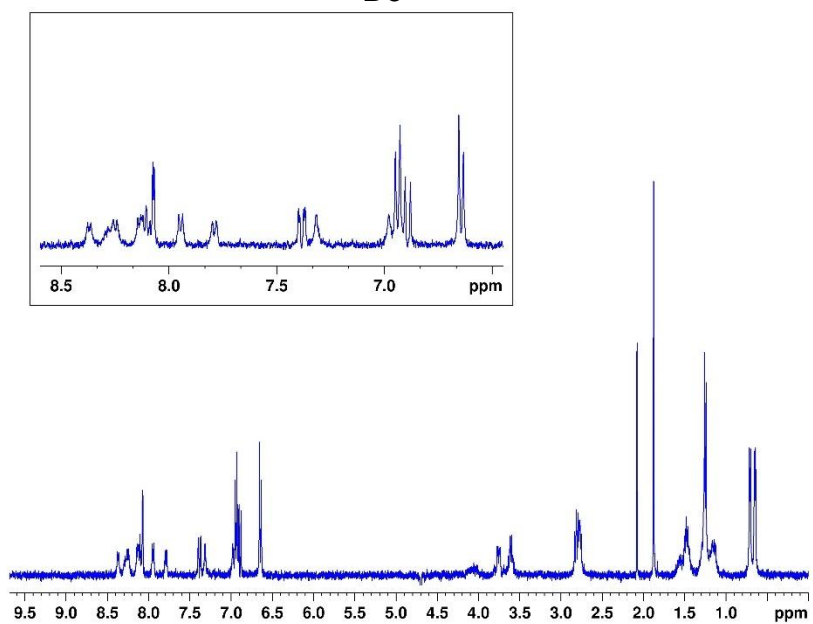

**D4**

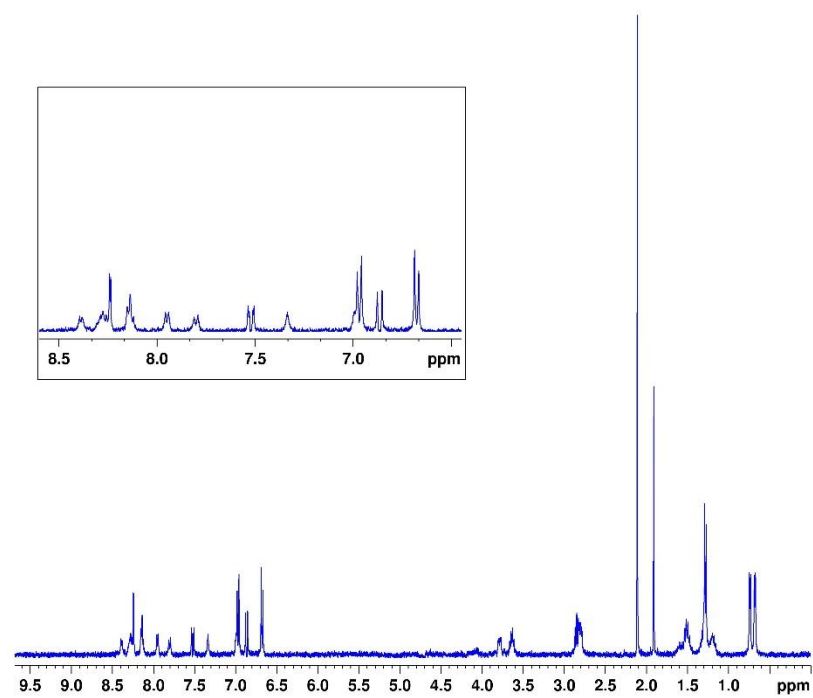

**Figure S5. NMR spectra for nitroarylated model peptides (continued)**

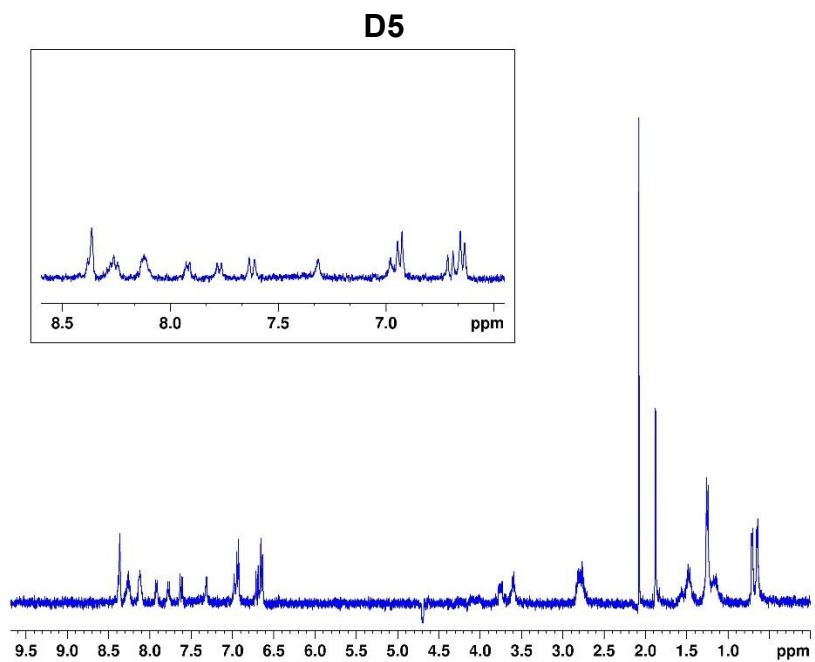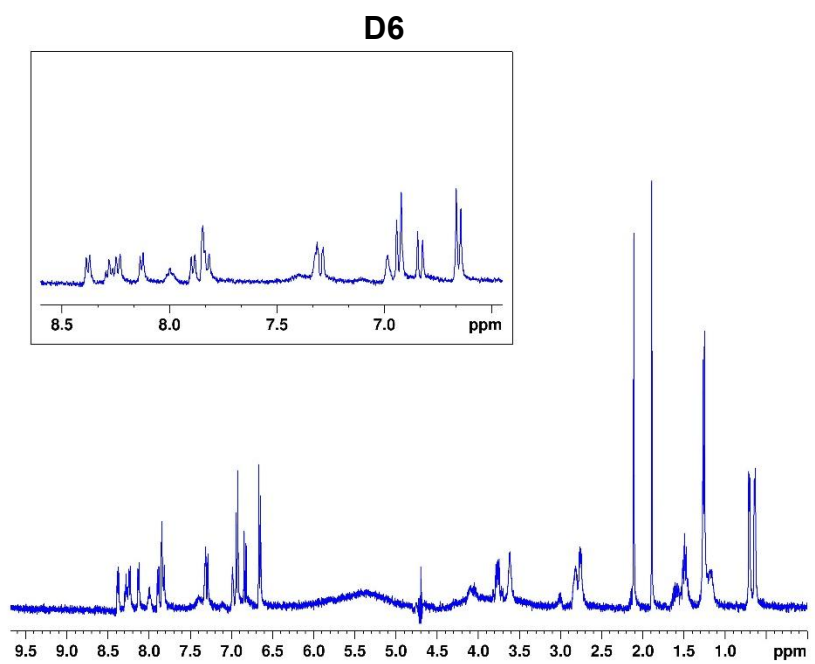

**Figure S5. NMR spectra for nitroarylated model peptides (continued)**

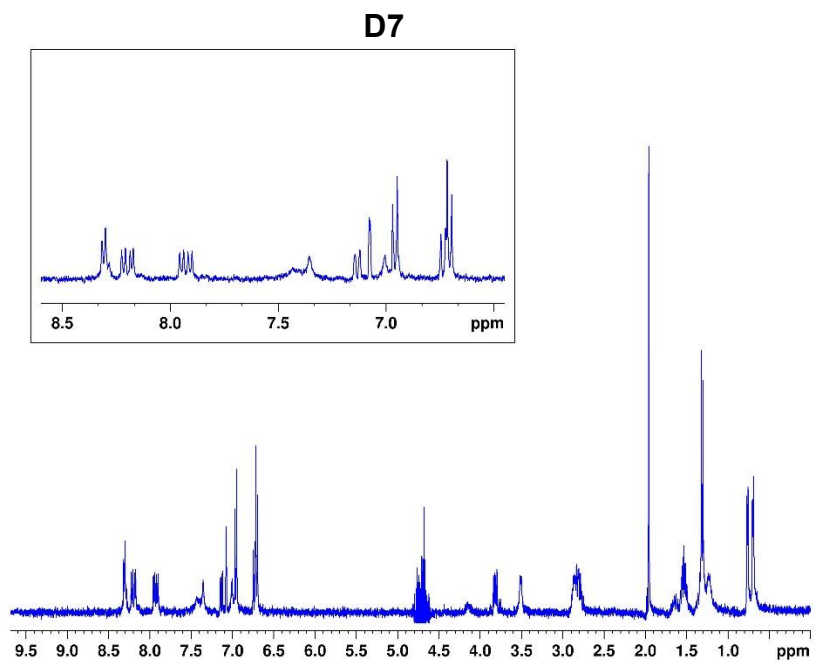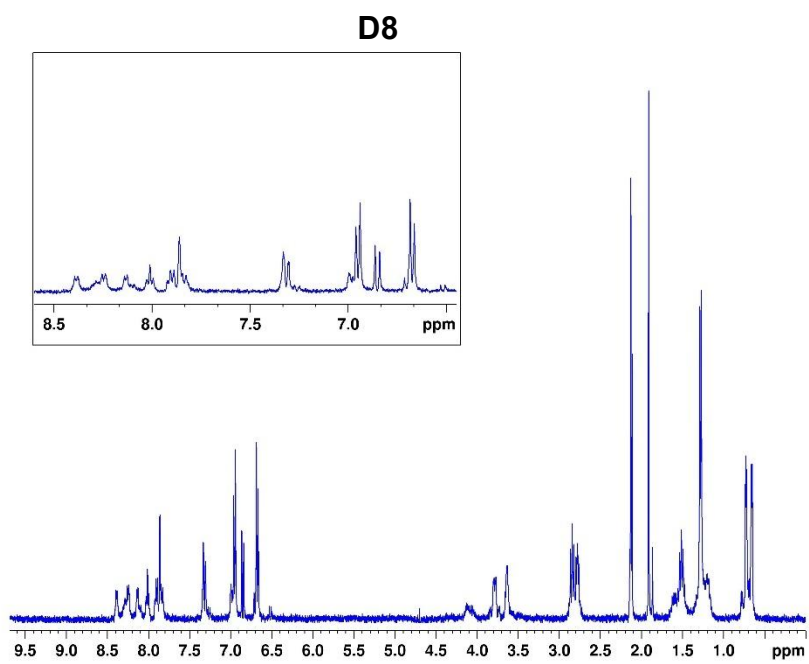

**Figure S5. NMR spectra for nitroarylated model peptides (continued)**

**D9**

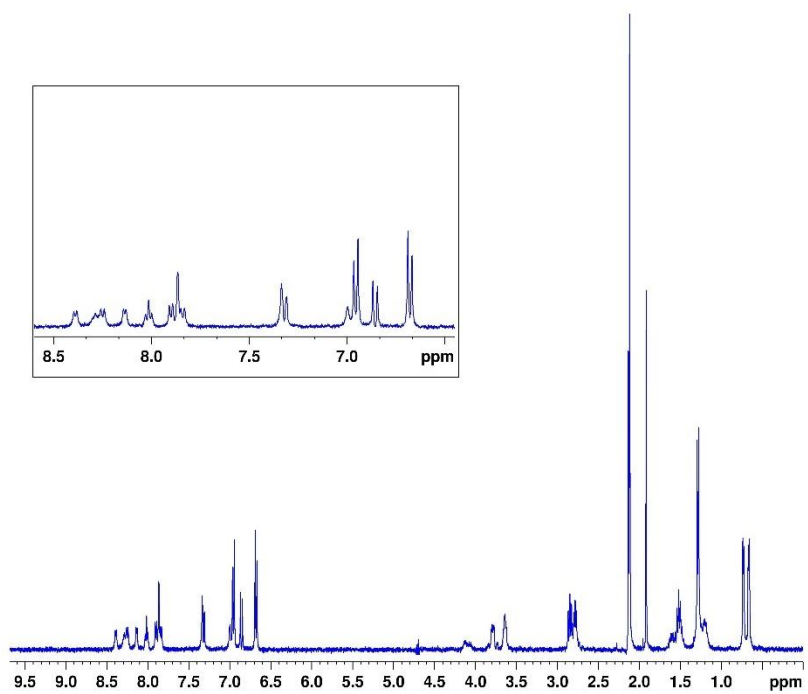

**D10**

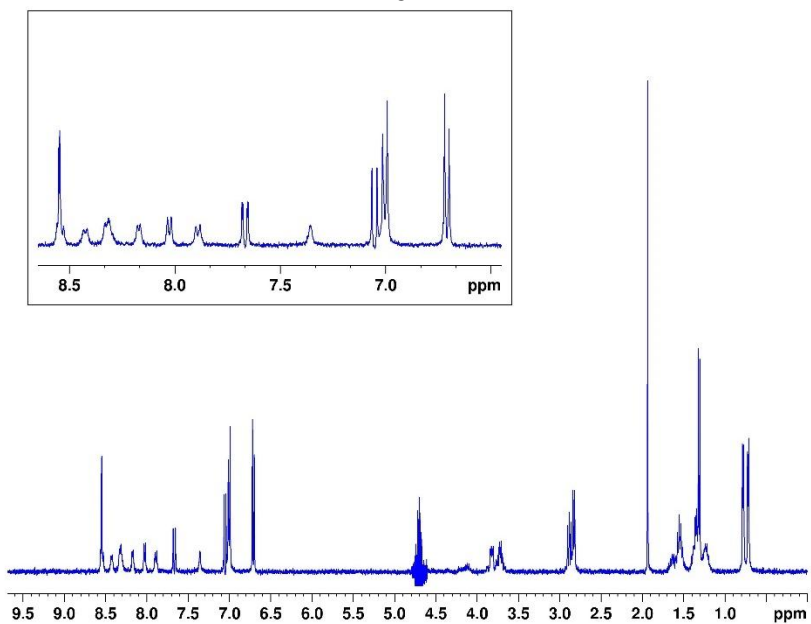

**Figure S5. NMR spectra for nitroarylated model peptides (continued)**

D11

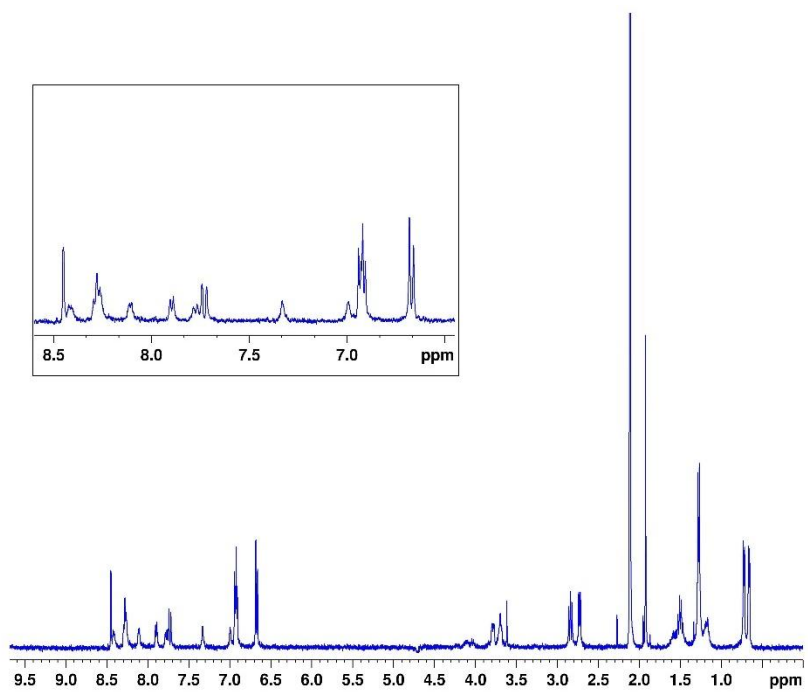

D12

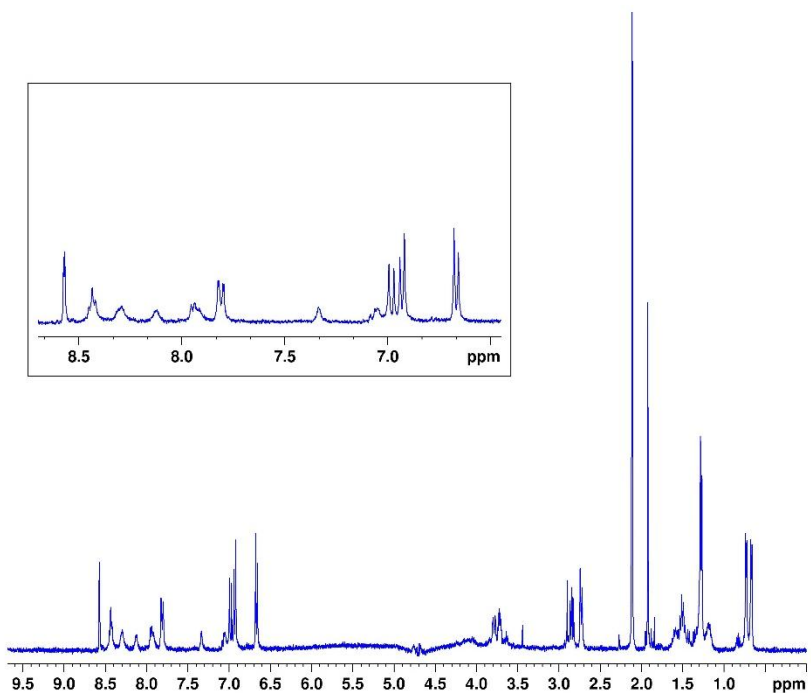

Figure S5. NMR spectra for nitroarylated model peptides (continued)

**D13**

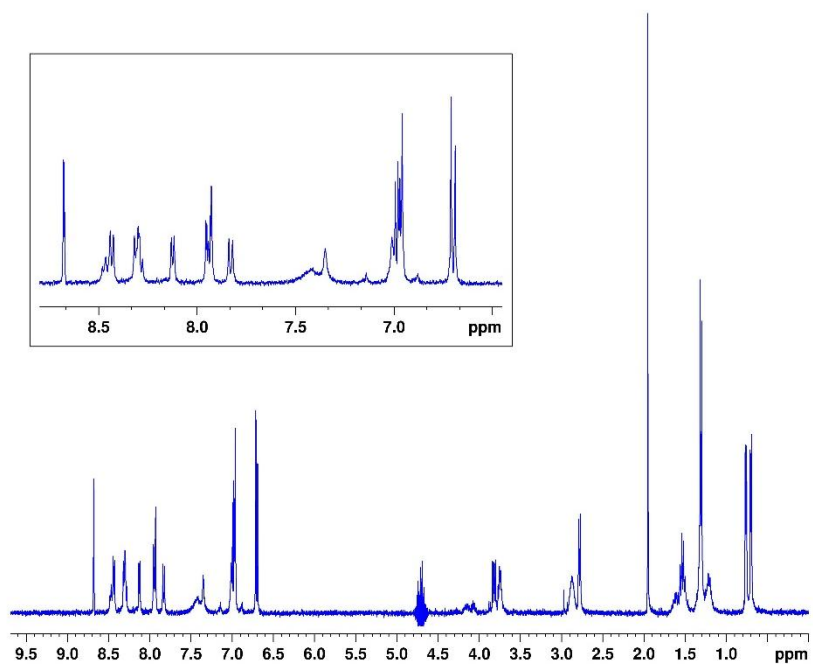

**D14**

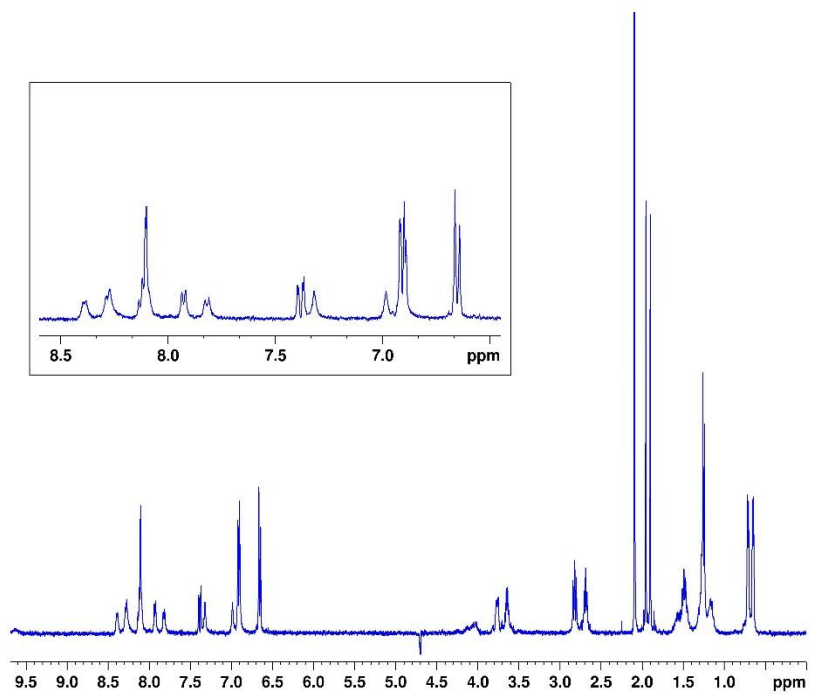

**Figure S5. NMR spectra for nitroarylated model peptides (continued)**

**D15**

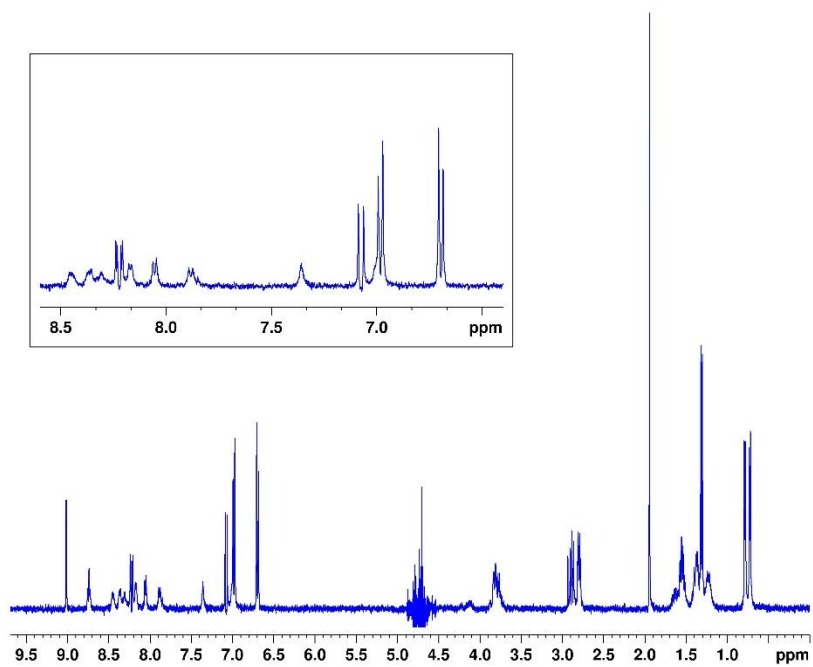

**D16**

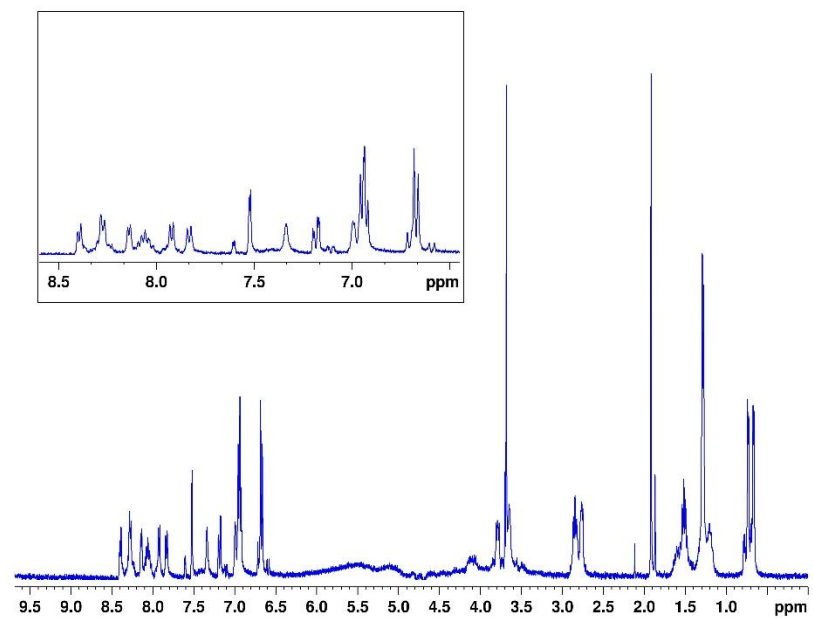

**Figure S5. NMR spectra for nitroarylated model peptides (continued)**

D17

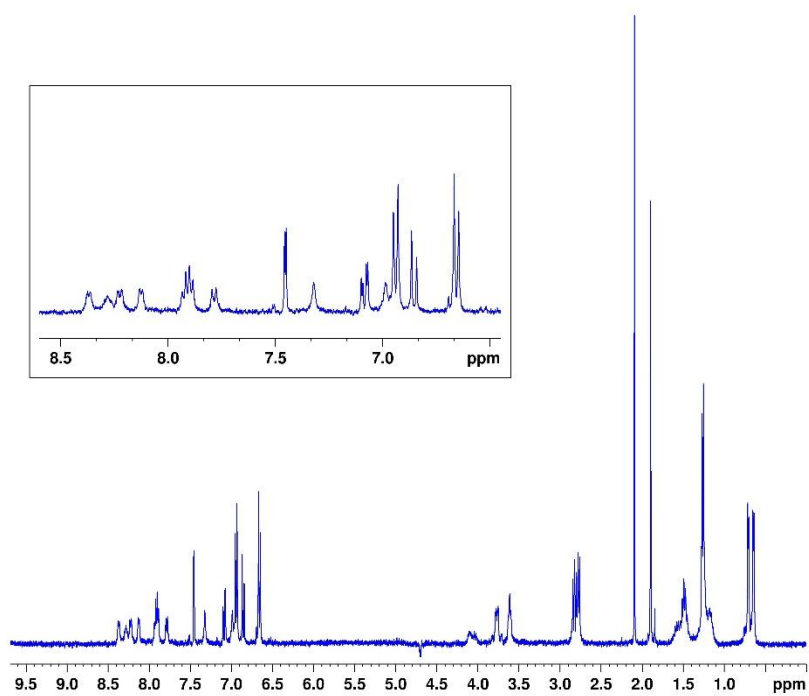

D18

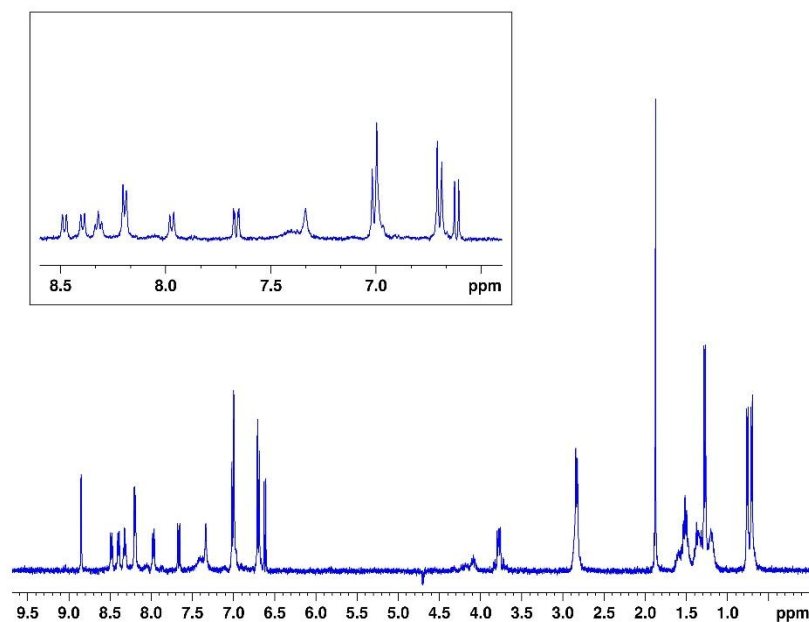

Figure S5. NMR spectra for nitroarylated model peptides (continued)

**D19**

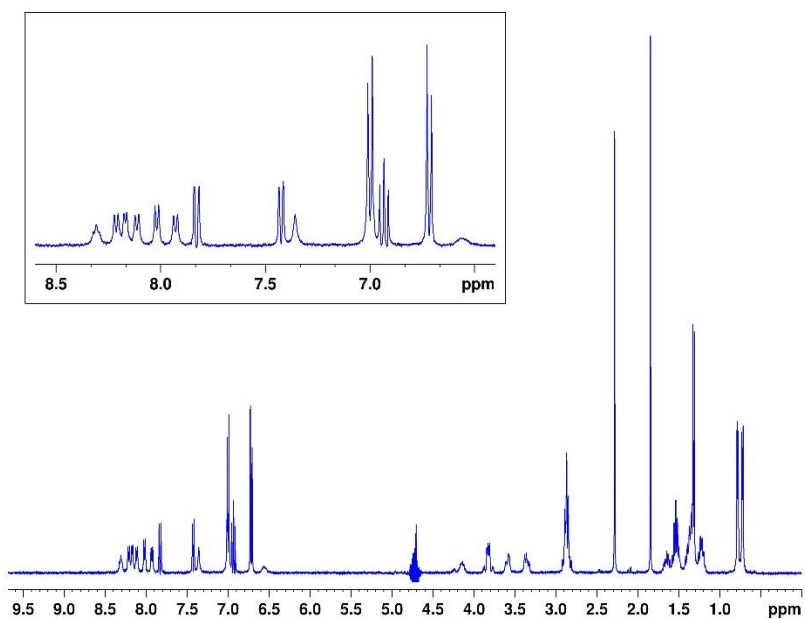

**D20**

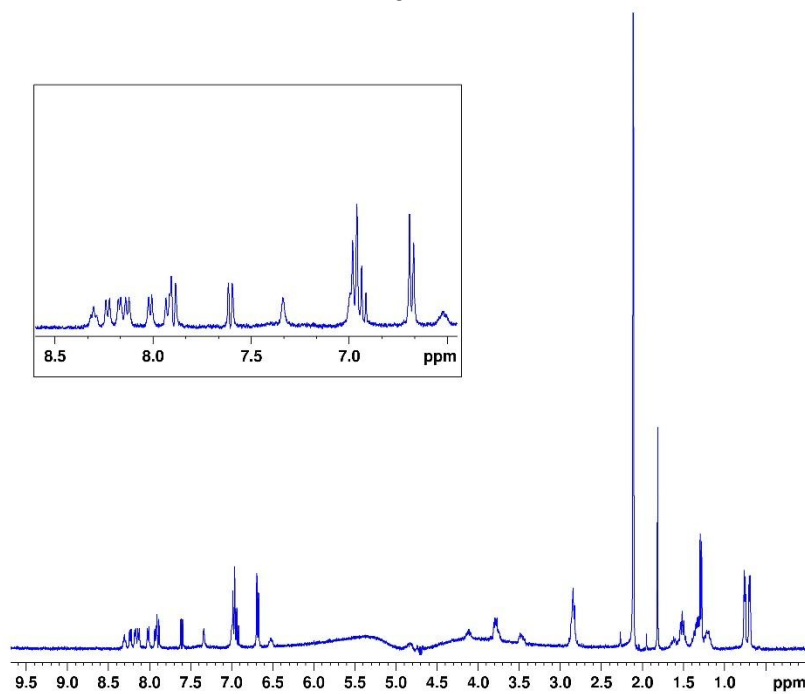

**Figure S5. NMR spectra for nitroarylated model peptides (continued)**

D21

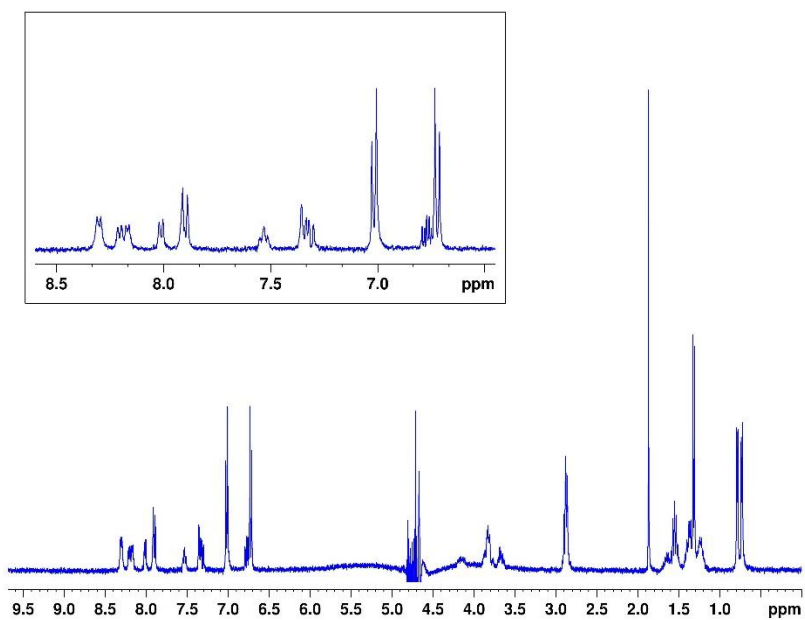

D22

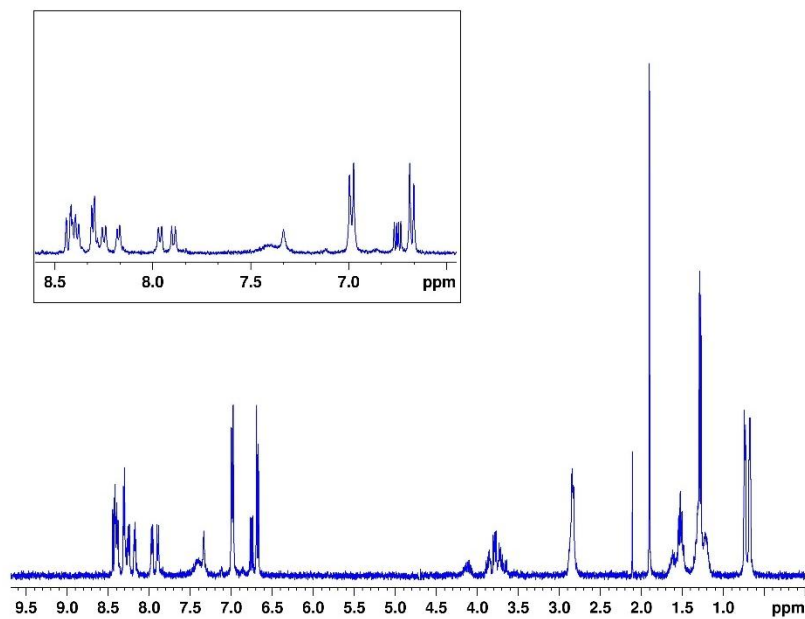

Figure S5. NMR spectra for nitroarylated model peptides (continued)

D23

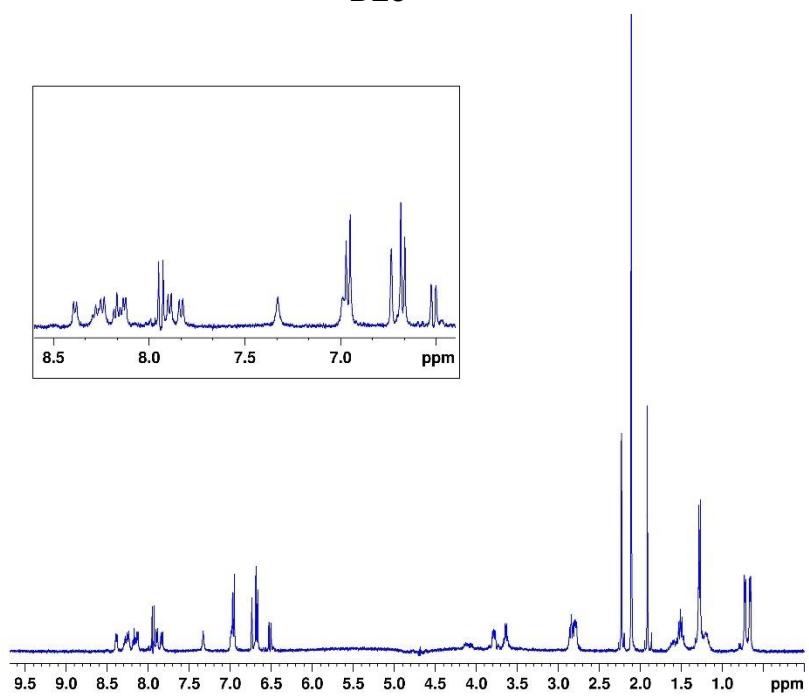

D24

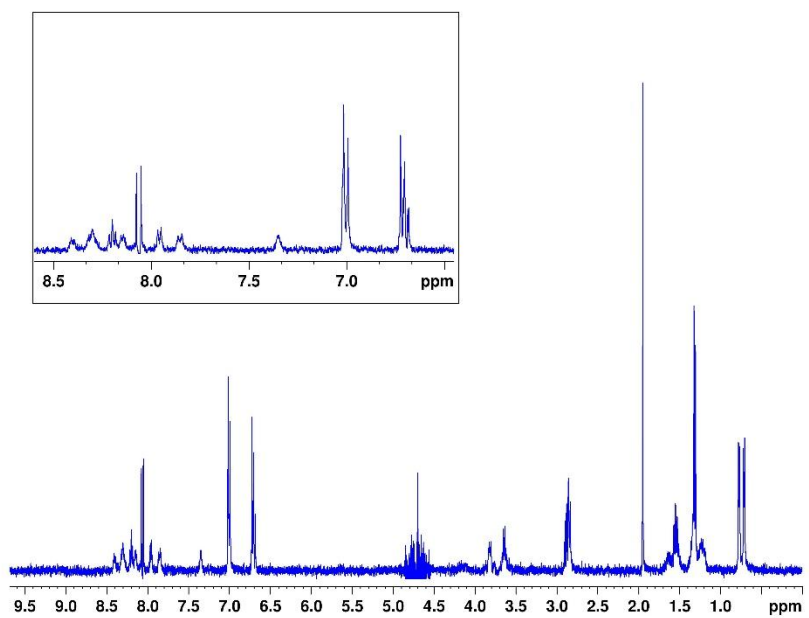

Figure S5. NMR spectra for nitroarylated model peptides (continued)

**D25**

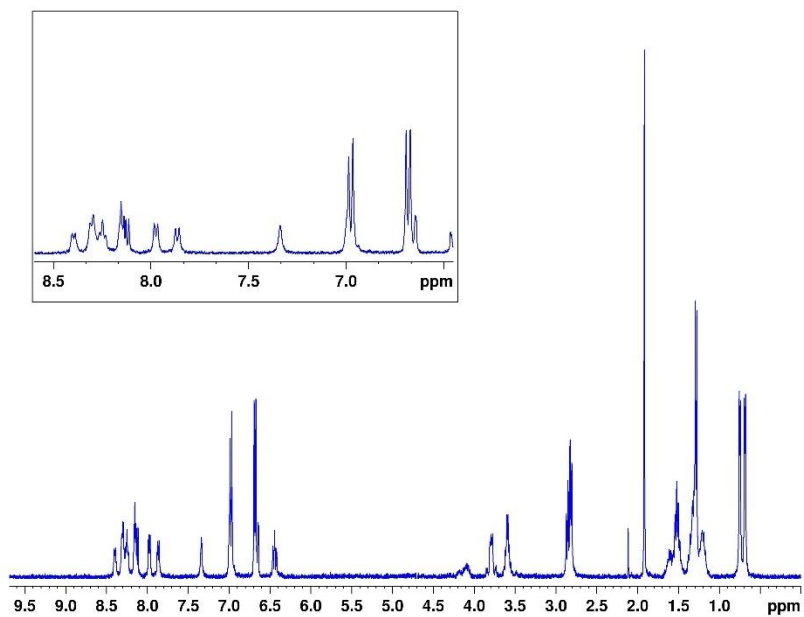

**D26**

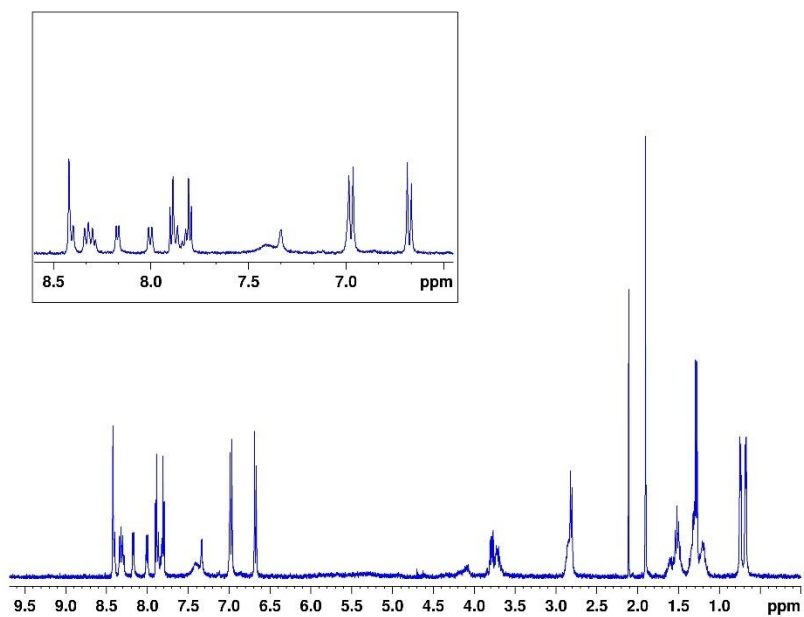

**Figure S5. NMR spectra for nitroarylated model peptides (continued)**

**D28**

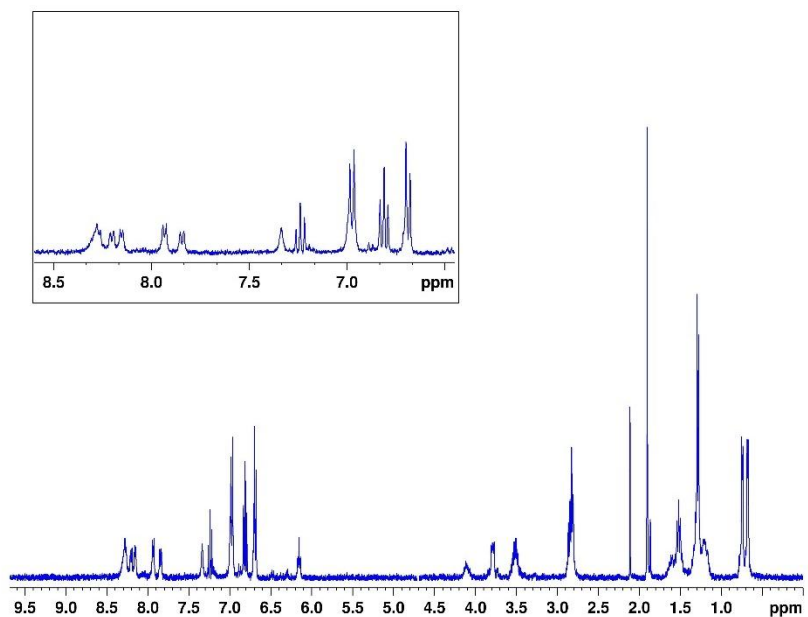

**D29**

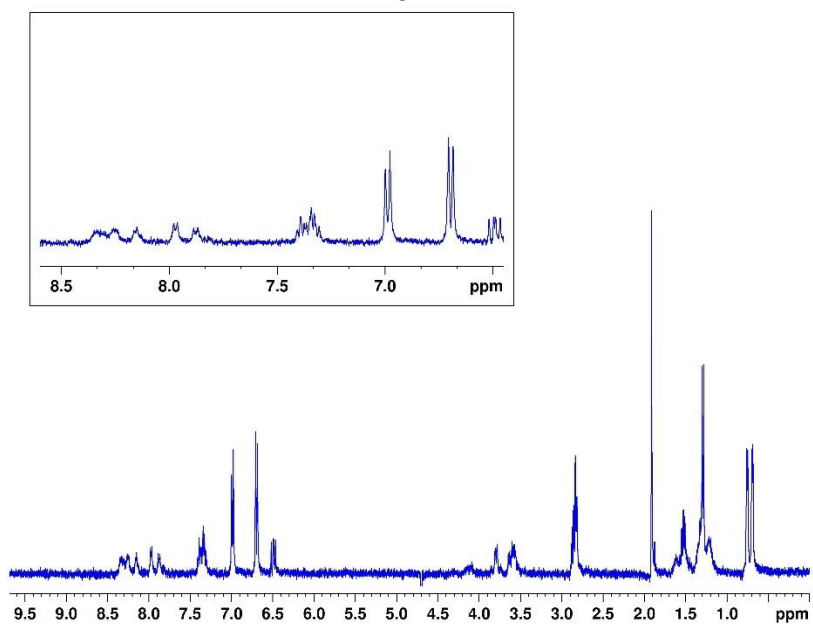

**Figure S5. NMR spectra for nitroarylated model peptides (continued)**

**D30**

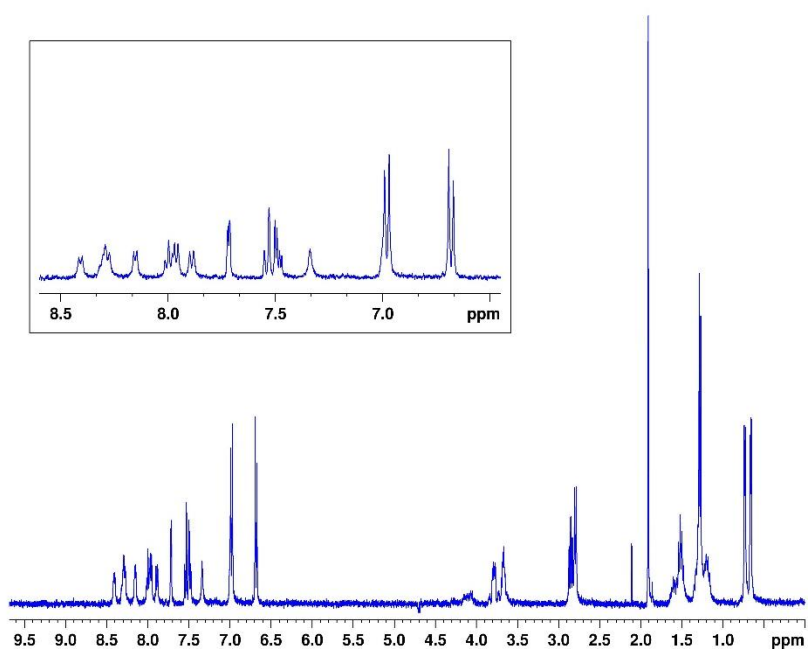

**D31**

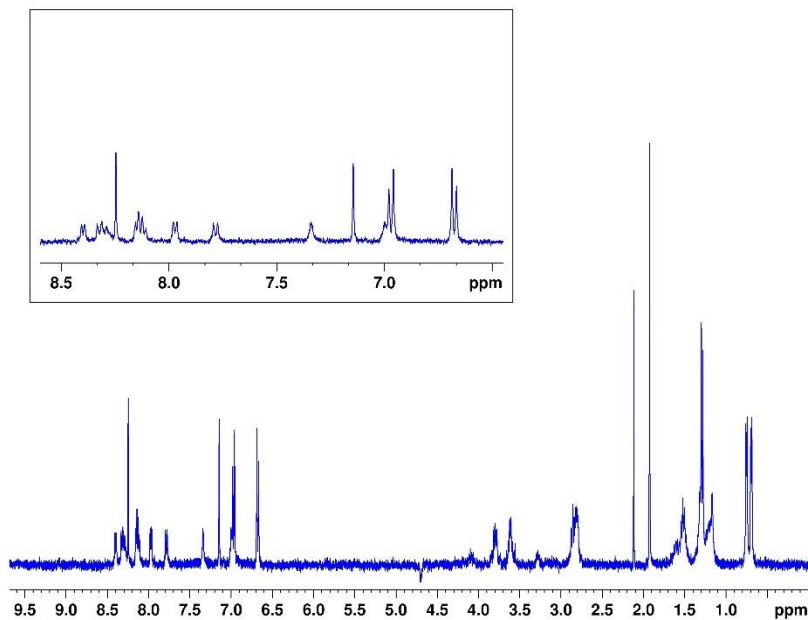

**Figure S5. NMR spectra for nitroarylated model peptides (continued)**

**D32**

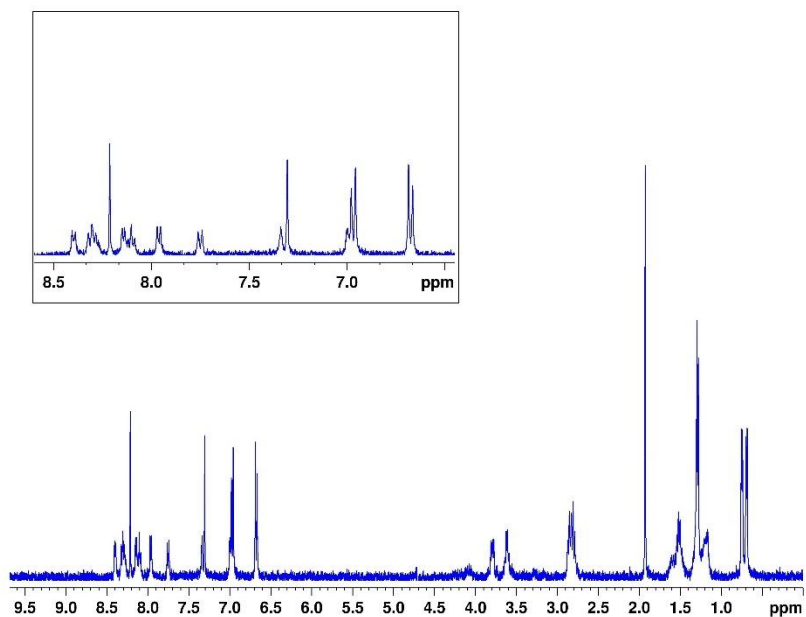

**D33**

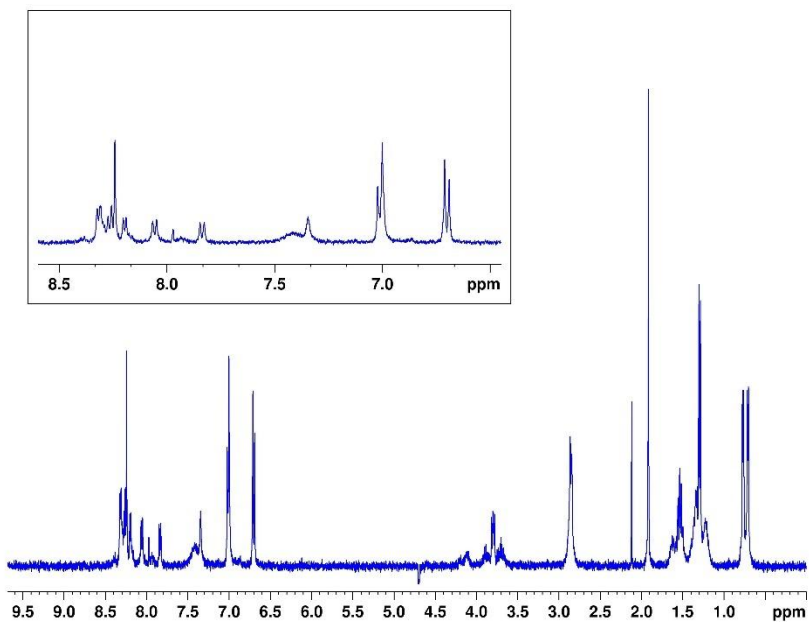

**Figure S5. NMR spectra for nitroarylated model peptides (continued)**

**D34**

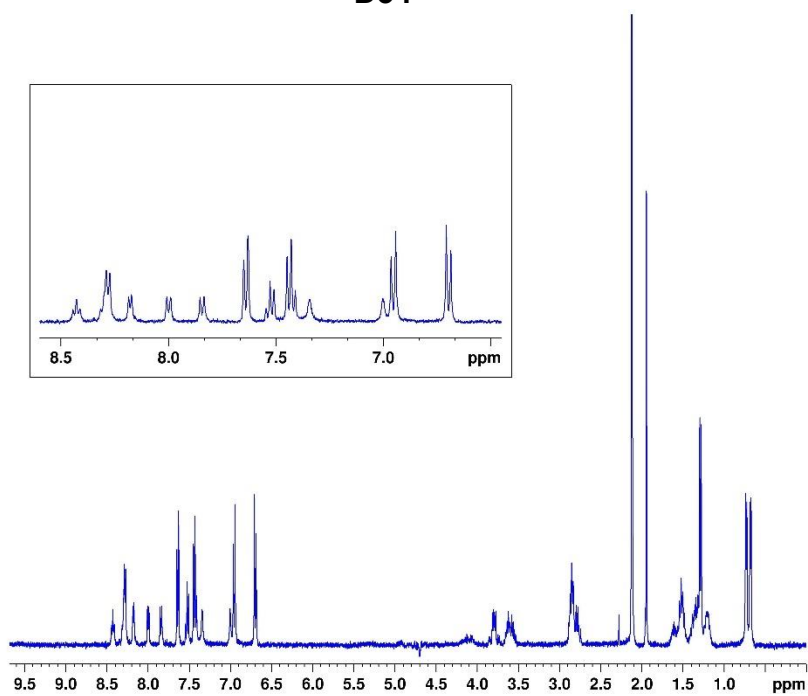

**C35**

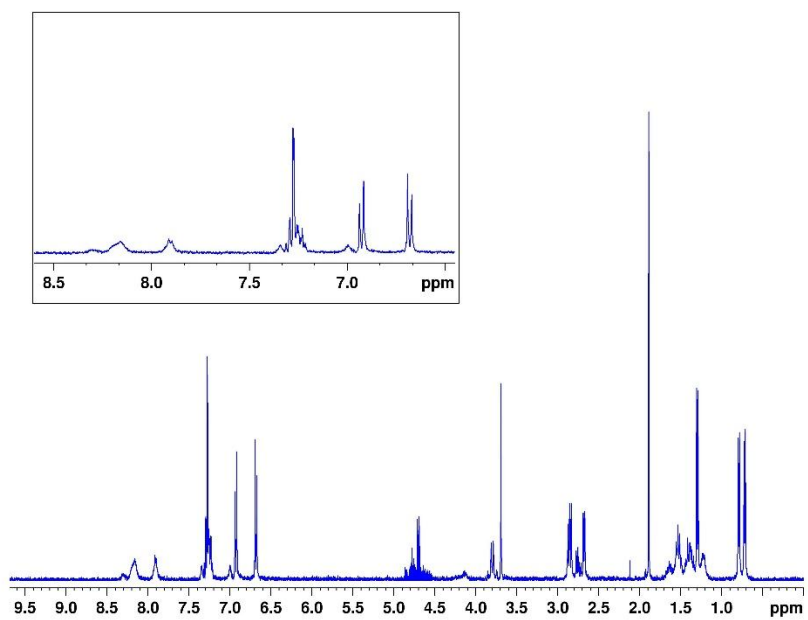

**Figure S5. NMR spectra for nitroarylated model peptides (continued)**

**Table S1. Nitroarene reagents**

| Arene | Chemical Name                              | CAS Number | Structure | Source                       |
|-------|--------------------------------------------|------------|-----------|------------------------------|
| A1    | 1-Fluoro-2-nitrobenzene                    | 1493-27-2  |           | Oakwood Chemical             |
| A2    | 2,5-Difluoronitrobenzene                   | 364-74-9   |           | Oakwood Chemical             |
| A3    | 5-Chloro-2-fluoronitrobenzene              | 345-18-6   |           | Oakwood Chemical             |
| A4    | 5-Bromo-2-fluoronitrobenzene               | 364-73-8   |           | Oakwood Chemical             |
| A5    | 1-Fluoro-4-iodo-2-nitrobenzene             | 364-75-0   |           | Oakwood Chemical             |
| A6    | 4-(Difluoromethyl)-1-fluoro-2-nitrobenzene | 61324-89-8 |           | Ambeed                       |
| A7    | 4-Fluoro-3-nitrobenzotrifluoride           | 367-86-2   |           | Oakwood Chemical             |
| A8    | 4-Fluoro-3-nitrotoluene                    | 446-11-7   |           | Oakwood Chemical             |
| A9    | 4-Fluoro-3-nitrobenzaldehyde               | 42564-51-2 |           | Ambeed                       |
| A10   | 4-Fluoro-3-nitrobenzotrifluoride           | 1009-35-4  |           | Ambeed                       |
| A11   | 4'-Fluoro-3'-nitroacetophenone             | 400-93-1   |           | Ambeed                       |
| A12   | 4-Fluoro-3-nitrobenzamide                  | 349-02-0   |           | Ambeed                       |
| A13   | 4-Fluoro-3-nitrobenzoic acid               | 453-71-4   |           | Ambeed                       |
| A14   | N-(4-Fluoro-3-nitrophenyl)acetamide        | 351-32-6   |           | Synthesized based on ref. 67 |
| A15   | 1-Fluoro-2,4-dinitrobenzene                | 70-34-8    |           | Oakwood Chemical             |

**Table S1. Nitroarene reagents (continued)**

| Arene | Chemical Name                                                                       | CAS Number                              | Structure | Source                             |
|-------|-------------------------------------------------------------------------------------|-----------------------------------------|-----------|------------------------------------|
| A16   | 4-Fluoro-3-nitroanisole                                                             | 61324-93-4                              |           | Ambeed                             |
| A17   | 4-Fluoro-3-nitrophenol<br>(from 4-(1,1-dimethylethoxy)-<br>1-fluoro-2-nitrobenzene) | 2105-96-6<br>(from CAS<br>1369848-20-3) |           | Ether prepared<br>based on ref. 68 |
| A18   | 4-Fluoro-3-nitropyridine                                                            | 115812-96-9                             |           | Ambeed                             |
| A19   | 2-Fluoro-3-nitrotoluene                                                             | 437-86-5                                |           | Ambeed                             |
| A20   | 3-Chloro-2-fluoronitrobenzene                                                       | 2106-49-2                               |           | Ambeed                             |
| A21   | 2,3-Difluoronitrobenzene                                                            | 6921-22-8                               |           | Ambeed                             |
| A22   | 2-Fluoro-3-nitropyridine                                                            | 1480-87-1                               |           | Ambeed                             |
| A23   | 3-Fluoro-4-nitrotoluene                                                             | 446-34-4                                |           | Ambeed                             |
| A24   | 4-Chloro-2-fluoronitrobenzene                                                       | 700-37-8                                |           | Ambeed                             |
| A25   | 2,4-Difluoronitrobenzene                                                            | 1009-35-4                               |           | Ambeed                             |
| A26   | 3-Fluoro-4-nitropyridine                                                            | 13505-01-6                              |           | Ambeed                             |
| A27   | 3-Fluoro-2-nitrotoluene                                                             | 3013-27-2                               |           | Ambeed                             |
| A28   | 2-Chloro-6-fluoronitrobenzene                                                       | 453-71-4                                |           | Ambeed                             |
| A29   | 1,3-Difluoro-2-nitrobenzene                                                         | 19064-24-5                              |           | Ambeed                             |
| A30   | 3-Fluoro-2-nitropyridine                                                            | 54231-35-5                              |           | Ambeed                             |

**Table S1. Nitroarene reagents (continued)**

| Arene | Chemical Name                            | CAS Number   | Structure                                                                          | Source |
|-------|------------------------------------------|--------------|------------------------------------------------------------------------------------|--------|
| A31   | 1,2-Dichloro-4-fluoro-5-nitrobenzene     | 2339-78-8    | 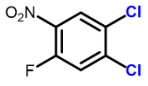 | Ambeed |
| A32   | 1-Bromo-2-chloro-5-fluoro-4-nitrobenzene | 1027833-17-5 |  | Ambeed |
| A33   | 4,6-Dichloro-5-nitropyrimidine           | 4316-93-2    |  | Ambeed |

**Table S2. MALDI mass spectrometry characterization of peptides  
(Ac = acetyl, NH<sub>2</sub> = amidated C-terminus)**

| Peptide | Sequence                      | Structure                                                                            | Expected m/z (M+H <sup>+</sup> ) | Observed m/z (M+H <sup>+</sup> ) |
|---------|-------------------------------|--------------------------------------------------------------------------------------|----------------------------------|----------------------------------|
| C1      | Ac-C(A1)LYKAG-NH <sub>2</sub> | 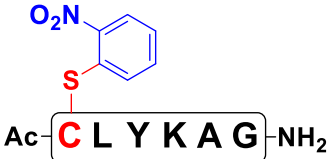   | 816.4                            | 816.6                            |
| C2      | Ac-C(A2)LYKAG-NH <sub>2</sub> |    | 834.4                            | 834.9                            |
| C3      | Ac-C(A3)LYKAG-NH <sub>2</sub> |    | 850.3                            | 849.7                            |
| C4      | Ac-C(A4)LYKAG-NH <sub>2</sub> |   | 942.3                            | 941.5                            |
| C5      | Ac-C(A5)LYKAG-NH <sub>2</sub> |  | 942.3                            | 941.5                            |
| C6      | Ac-C(A6)LYKAG-NH <sub>2</sub> |  | 866.4                            | 865.5                            |
| C7      | Ac-C(A7)LYKAG-NH <sub>2</sub> |  | 884.4                            | 883.7                            |
| C8      | Ac-C(A8)LYKAG-NH <sub>2</sub> |  | 830.4                            | 830.7                            |

**Table S2. MALDI mass spectrometry characterization of peptides (continued)**  
**(Ac = acetyl, NH<sub>2</sub> = amidated C-terminus)**

| Peptide | Sequence                                                                        | Structure | Expected m/z (M+H <sup>+</sup> ) | Observed m/z (M+H <sup>+</sup> ) |
|---------|---------------------------------------------------------------------------------|-----------|----------------------------------|----------------------------------|
| C9      | Ac-C(A9*)LYKAG-NH <sub>2</sub><br>* original aldehyde reduced to methyl alcohol |           | 846.4                            | 845.4                            |
| C10     | Ac-C(A10)LYKAG-NH <sub>2</sub>                                                  |           | 841.4                            | 840.6                            |
| C11     | Ac-C(A11)LYKAG-NH <sub>2</sub>                                                  |           | 858.4                            | 858.5                            |
| C12     | Ac-C(A12)LYKAG-NH <sub>2</sub>                                                  |           | 859.4                            | 858.8                            |
| C13     | Ac-C(A13)LYKAG-NH <sub>2</sub>                                                  |           | 860.4                            | 860.0                            |
| C14     | Ac-C(A14)LYKAG-NH <sub>2</sub>                                                  |           | 873.4                            | 873.5                            |
| C15     | Ac-C(A15)LYKAG-NH <sub>2</sub>                                                  |           | 861.4                            | 860.8                            |
| C16     | Ac-C(A16)LYKAG-NH <sub>2</sub>                                                  |           | 846.4                            | 845.6                            |

**Table S2. MALDI mass spectrometry characterization of peptides (continued)**  
**(Ac = acetyl, NH<sub>2</sub> = amidated C-terminus)**

| Peptide | Sequence                       | Structure | Expected m/z (M+H <sup>+</sup> ) | Observed m/z (M+H <sup>+</sup> ) |
|---------|--------------------------------|-----------|----------------------------------|----------------------------------|
| C17     | Ac-C(A17)LYKAG-NH <sub>2</sub> |           | 832.9                            | 832.7                            |
| C18     | Ac-C(A18)LYKAG-NH <sub>2</sub> |           | 817.4                            | 817.7                            |
| C19     | Ac-C(A19)LYKAG-NH <sub>2</sub> |           | 830.4                            | 829.7                            |
| C20     | Ac-C(A20)LYKAG-NH <sub>2</sub> |           | 850.3                            | 849.8                            |
| C21     | Ac-C(A21)LYKAG-NH <sub>2</sub> |           | 834.4                            | 833.8                            |
| C22     | Ac-C(A22)LYKAG-NH <sub>2</sub> |           | 817.4                            | 816.6                            |
| C23     | Ac-C(A23)LYKAG-NH <sub>2</sub> |           | 830.4                            | 829.8                            |
| C24     | Ac-C(A24)LYKAG-NH <sub>2</sub> |           | 850.3                            | 849.8                            |

**Table S2. MALDI mass spectrometry characterization of peptides (continued)**  
**(Ac = acetyl, NH<sub>2</sub> = amidated C-terminus)**

| Peptide | Sequence                       | Structure                                                                            | Expected m/z (M+H <sup>+</sup> ) | Observed m/z (M+H <sup>+</sup> ) |
|---------|--------------------------------|--------------------------------------------------------------------------------------|----------------------------------|----------------------------------|
| C25     | Ac-C(A25)LYKAG-NH <sub>2</sub> | 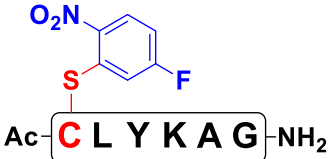   | 834.4                            | 834.8                            |
| C26     | Ac-C(A26)LYKAG-NH <sub>2</sub> |    | 817.4                            | 817.0                            |
| C28     | Ac-C(A28)LYKAG-NH <sub>2</sub> |    | 850.3                            | 850.5                            |
| C29     | Ac-C(A29)LYKAG-NH <sub>2</sub> |   | 834.4                            | 834.8                            |
| C30     | Ac-C(A30)LYKAG-NH <sub>2</sub> |  | 817.4                            | 817.9                            |
| C31     | Ac-C(A31)LYKAG-NH <sub>2</sub> |  | 884.3                            | 883.9                            |
| C32     | Ac-C(A32)LYKAG-NH <sub>2</sub> |  | 928.2                            | 928.6                            |
| C33     | Ac-C(A33)LYKAG-NH <sub>2</sub> |  | 852.3                            | 853.2                            |
| C35     | Ac-C(A35)LYKAG-NH <sub>2</sub> |  | 785.4                            | 785.9                            |

**Table S2. MALDI mass spectrometry characterization of peptides**  
**(Ac = acetyl, NH<sub>2</sub> = amidated C-terminus, Dap/X = 2,3-diaminopropionic acid**  
**residue)**

| Peptide | Sequence                                                                                   | Structure                                                                            | Expected m/z (M+H <sup>+</sup> ) | Observed m/z (M+H <sup>+</sup> ) |
|---------|--------------------------------------------------------------------------------------------|--------------------------------------------------------------------------------------|----------------------------------|----------------------------------|
| D1      | Ac-Dap(A1)LYKAG-NH <sub>2</sub>                                                            | 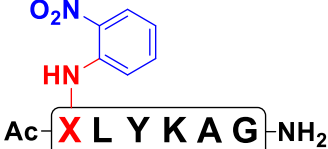   | 799.4                            | 798.7                            |
| D2      | Ac-Dap(A2)LYKAG-NH <sub>2</sub>                                                            |    | 817.4                            | 817.0                            |
| D3      | Ac-Dap(A3)LYKAG-NH <sub>2</sub>                                                            |    | 833.3                            | 833.0                            |
| D4      | Ac-Dap(A4)LYKAG-NH <sub>2</sub>                                                            |   | 878.8                            | 879.1                            |
| D5      | Ac-Dap(A5)LYKAG-NH <sub>2</sub>                                                            |  | 925.3                            | 926.1                            |
| D6      | Ac-Dap(A6*)LYKAG-NH <sub>2</sub><br>*original difluoromethyl group reduced to methyl group |  | 813.4                            | 812.8                            |
| D7      | Ac-Dap(A7)LYKAG-NH <sub>2</sub>                                                            |  | 867.4                            | 866.9                            |
| D8      | Ac-Dap(A8)LYKAG-NH <sub>2</sub>                                                            |  | 813.4                            | 813.1                            |

**Table S2. MALDI mass spectrometry characterization of peptides (continued)**  
**(Ac = acetyl, NH<sub>2</sub> = amidated C-terminus, Dap/X = 2,3-diaminopropionic acid residue)**

| Peptide | Sequence                                                                       | Structure | Expected m/z (M+H <sup>+</sup> ) | Observed m/z (M+H <sup>+</sup> ) |
|---------|--------------------------------------------------------------------------------|-----------|----------------------------------|----------------------------------|
| D9      | Ac-Dap(A9*)LYKAG-NH <sub>2</sub><br>*original aldehyde reduced to methyl group |           | 813.4                            | 813.7                            |
| D10     | Ac-Dap(A10)LYKAG-NH <sub>2</sub>                                               |           | 824.4                            | 823.9                            |
| D11     | Ac-Dap(A11)LYKAG-NH <sub>2</sub>                                               |           | 842.4                            | 842.6                            |
| D12     | Ac-Dap(A12)LYKAG-NH <sub>2</sub>                                               |           | 842.4                            | 843.0                            |
| D13     | Ac-Dap(A13)LYKAG-NH <sub>2</sub>                                               |           | 843.4                            | 844.2                            |
| D14     | Ac-Dap(A14)LYKAG-NH <sub>2</sub>                                               |           | 856.4                            | 856.6                            |
| D15     | Ac-Dap(A15)LYKAG-NH <sub>2</sub>                                               |           | 844.4                            | 845.3                            |
| D16     | Ac-Dap(A16)LYKAG-NH <sub>2</sub>                                               |           | 829.4                            | 829.8                            |

**Table S2. MALDI mass spectrometry characterization of peptides (continued)**  
 (Ac = acetyl, NH<sub>2</sub> = amidated C-terminus, Dap/X = 2,3-diaminopropionic acid residue)

| Peptide | Sequence                         | Structure                                                                            | Expected m/z (M+H <sup>+</sup> ) | Observed m/z (M+H <sup>+</sup> ) |
|---------|----------------------------------|--------------------------------------------------------------------------------------|----------------------------------|----------------------------------|
| D17     | Ac-Dap(A17)LYKAG-NH <sub>2</sub> | 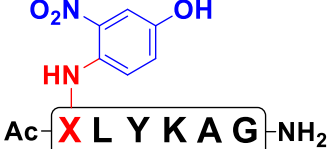   | 815.9                            | 815.7                            |
| D18     | Ac-Dap(A18)LYKAG-NH <sub>2</sub> |    | 800.4                            | 800.7                            |
| D19     | Ac-Dap(A19)LYKAG-NH <sub>2</sub> |    | 813.4                            | 813.1                            |
| D20     | Ac-Dap(A20)LYKAG-NH <sub>2</sub> |   | 833.3                            | 833.2                            |
| D21     | Ac-Dap(A21)LYKAG-NH <sub>2</sub> |  | 817.4                            | 816.9                            |
| D22     | Ac-Dap(A22)LYKAG-NH <sub>2</sub> |  | 800.4                            | 799.5                            |
| D23     | Ac-Dap(A23)LYKAG-NH <sub>2</sub> |  | 813.4                            | 814.0                            |
| D24     | Ac-Dap(A24)LYKAG-NH <sub>2</sub> |  | 833.3                            | 832.9                            |

**Table S2. MALDI mass spectrometry characterization of peptides (continued)**  
 (Ac = acetyl, NH<sub>2</sub> = amidated C-terminus, Dap/X = 2,3-diaminopropionic acid residue)

| Peptide | Sequence                         | Structure                                                                            | Expected m/z (M+H <sup>+</sup> ) | Observed m/z (M+H <sup>+</sup> ) |
|---------|----------------------------------|--------------------------------------------------------------------------------------|----------------------------------|----------------------------------|
| D25     | Ac-Dap(A25)LYKAG-NH <sub>2</sub> | 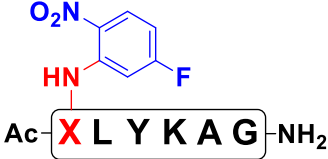   | 817.4                            | 817.0                            |
| D26     | Ac-Dap(A26)LYKAG-NH <sub>2</sub> |    | 800.4                            | 800.7                            |
| D28     | Ac-Dap(A28)LYKAG-NH <sub>2</sub> |    | 833.3                            | 833                              |
| D29     | Ac-Dap(A29)LYKAG-NH <sub>2</sub> |   | 817.4                            | 817.1                            |
| D30     | Ac-Dap(A30)LYKAG-NH <sub>2</sub> |  | 800.4                            | 799.8                            |
| D31     | Ac-Dap(A31)LYKAG-NH <sub>2</sub> |  | 867.3                            | 866.9                            |
| D32     | Ac-Dap(A32)LYKAG-NH <sub>2</sub> |  | 911.2                            | 911.0                            |
| D33     | Ac-Dap(A33)LYKAG-NH <sub>2</sub> |  | 835.4                            | 834.9                            |
| D34     | Ac-Dap(A34)LYKAG-NH <sub>2</sub> |  | 782.4                            | 782.8                            |

**Table S2. MALDI mass spectrometry characterization of peptides (continued)**  
 (NH<sub>2</sub> = amidated C-terminus, Dap/X = 2,3-diaminopropionic acid residue,  
 c = 3-mercaptopropionic acid; r = L-homoarginine)

| Peptide | Sequence                       | Structure                                                                            | Expected m/z (M+H <sup>+</sup> ) | Observed m/z (M+H <sup>+</sup> ) |
|---------|--------------------------------|--------------------------------------------------------------------------------------|----------------------------------|----------------------------------|
| E-C1    | crGDC(A1)PC-NH <sub>2</sub>    | 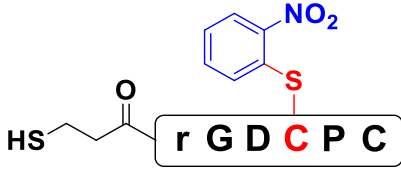   | 872.3                            | 872.7                            |
| E-C3    | crGDC(A3)PC-NH <sub>2</sub>    |    | 906.2                            | 906.6                            |
| E-C7    | crGDC(A7)PC-NH <sub>2</sub>    |    | 940.2                            | 940.6                            |
| E-C8    | crGDC(A8)PC-NH <sub>2</sub>    |   | 886.3                            | 886.8                            |
| E-C16   | crGDC(A16)PC-NH <sub>2</sub>   |  | 902.3                            | 902.8                            |
| E-D1    | crGD-Dap(A1)PC-NH <sub>2</sub> |  | 855.3                            | 855.3                            |
| E-D3    | crGD-Dap(A3)PC-NH <sub>2</sub> |  | 889.3                            | 889.9                            |
| E-D7    | crGD-Dap(A7)PC-NH <sub>2</sub> |  | 923.3                            | 923.6                            |

**Table S2. MALDI mass spectrometry characterization of peptides (continued)**  
**(Ac = acetyl, NH<sub>2</sub> = amidated C-terminus, Dap/X = 2,3-diaminopropionic acid residue, c = 3-mercaptopropionic acid; r = L-homoarginine)**

| Peptide | Sequence                                | Structure | Expected m/z (M+H <sup>+</sup> ) | Observed m/z (M+H <sup>+</sup> ) |
|---------|-----------------------------------------|-----------|----------------------------------|----------------------------------|
| E-D8    | crGD-Dap(A8)PC-NH <sub>2</sub>          |           | 869.3                            | 869.5                            |
| E-D16   | crGD-Dap(A16)PC-NH <sub>2</sub>         |           | 885.3                            | 885.7                            |
| M-C1    | Ac-SYSMEHFRC(A1)GKPV-NH <sub>2</sub>    |           | 1702.7                           | 1703.5                           |
| M-C3    | Ac-SYSMEHFRC(A3)GKPV-NH <sub>2</sub>    |           | 1736.7                           | 1736.2                           |
| M-C7    | Ac-SYSMEHFRC(A7)GKPV-NH <sub>2</sub>    |           | 1770.7                           | 1770.9                           |
| M-C8    | Ac-SYSMEHFRC(A8)GKPV-NH <sub>2</sub>    |           | 1716.8                           | 1717.9                           |
| M-C16   | Ac-SYSMEHFRC(A16)GKPV-NH <sub>2</sub>   |           | 1732.8                           | 1733.7                           |
| M-D1    | Ac-SYSMEHFR-Dap(A1)GKPV-NH <sub>2</sub> |           | 1685.8                           | 1686.4                           |
| M-D3    | Ac-SYSMEHFR-Dap(A3)GKPV-NH <sub>2</sub> |           | 1719.7                           | 1720.4                           |
| M-D7    | Ac-SYSMEHFR-Dap(A7)GKPV-NH <sub>2</sub> |           | 1753.8                           | 1753.1                           |

**Table S2. MALDI mass spectrometry characterization of peptides (continued)**  
**(Ac = acetyl, NH<sub>2</sub> = amidated C-terminus, Dap/X = 2,3-diaminopropionic acid residue)**

| Peptide | Sequence                                 | Structure               | Expected m/z (M+H <sup>+</sup> ) | Observed m/z (M+H <sup>+</sup> ) |
|---------|------------------------------------------|-------------------------|----------------------------------|----------------------------------|
| M-D8    | Ac-SYSMEHFR-Dap(A8)GKPV-NH <sub>2</sub>  | <p>Ac-SYSMEHFRXGKPV</p> | 1699.8                           | 1700.5                           |
| M-D16   | Ac-SYSMEHFR-Dap(A16)GKPV-NH <sub>2</sub> | <p>Ac-SYSMEHFRXGKPV</p> | 1715.8                           | 1716.5                           |
| S-C1    | SNEC(A1)IQPRLPQ-NH <sub>2</sub>          | <p>SNECIQPRLPQ</p>      | 1404.7                           | 1404.3                           |
| S-C3    | SNEC(A3)IQPRLPQ-NH <sub>2</sub>          | <p>SNECIQPRLPQ</p>      | 1418.7                           | 1418.2                           |
| S-C7    | SNEC(A7)IQPRLPQ-NH <sub>2</sub>          | <p>SNECIQPRLPQ</p>      | 1472.6                           | 1472.0                           |
| S-C8    | SNEC(A8)IQPRLPQ-NH <sub>2</sub>          | <p>SNECIQPRLPQ</p>      | 1418.3                           | 1417.9                           |
| S-C16   | SNEC(A16)IQPRLPQ-NH <sub>2</sub>         | <p>SNECIQPRLPQ</p>      | 1434.7                           | 1434.3                           |
| S-D1    | SNE-Dap(A1)IQPRLPQ-NH <sub>2</sub>       | <p>SNEXIQPRLPQ</p>      | 1387.7                           | 1387.3                           |
| S-D3    | SNE-Dap(A3)IQPRLPQ-NH <sub>2</sub>       | <p>SNEXIQPRLPQ</p>      | 1422.7                           | 1421.9                           |
| S-D7    | SNE-Dap(A7)IQPRLPQ-NH <sub>2</sub>       | <p>SNEXIQPRLPQ</p>      | 1455.7                           | 1456.1                           |

**Table S2. MALDI mass spectrometry characterization of peptides (continued)**  
 (Ac = acetyl, NH<sub>2</sub> = amidated C-terminus, Dap/X = 2,3-diaminopropionic acid residue, e = L-pyroglutamic acid, w = D-tryptophan)

| Peptide | Sequence                            | Structure                                                                            | Expected m/z (M+H <sup>+</sup> ) | Observed m/z (M+H <sup>+</sup> ) |
|---------|-------------------------------------|--------------------------------------------------------------------------------------|----------------------------------|----------------------------------|
| S-D8    | SNE-Dap(A8)IQPRLPQ-NH <sub>2</sub>  | 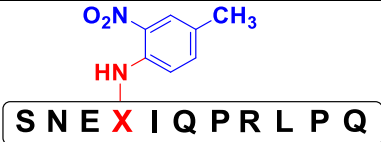   | 1401.7                           | 1401.4                           |
| S-D16   | SNE-Dap(A16)IQPRLPQ-NH <sub>2</sub> |    | 1417.7                           | 1417.6                           |
| T-C1    | eHC(A1)SYwLRPG-NH <sub>2</sub>      |    | 1349.6                           | 1349.8                           |
| T-C3    | eHC(A3)SYwLRPG-NH <sub>2</sub>      |    | 1383.5                           | 1384.0                           |
| T-C7    | eHC(A3)SYwLRPG-NH <sub>2</sub>      |  | 1417.6                           | 1417.9                           |
| T-C8    | eHC(A3)SYwLRPG-NH <sub>2</sub>      |  | 1364.0                           | 1363.2                           |
| T-C16   | eHC(A3)SYwLRPG-NH <sub>2</sub>      |  | 1379.6                           | 1379.9                           |
| T-D1    | eH-Dap(A1)SYwLRPG-NH <sub>2</sub>   |  | 1332.6                           | 1333.4                           |
| T-D3    | eH-Dap(A3)SYwLRPG-NH <sub>2</sub>   |  | 1365.6                           | 1366.9                           |

**Table S2. MALDI mass spectrometry characterization of peptides (continued)**  
 (Ac = acetyl, NH<sub>2</sub> = amidated C-terminus, Dap/X = 2,3-diaminopropionic acid residue, e = L-pyroglutamic acid, w = D-tryptophan, ACC = 7-amino-4-carbamoylmethylcoumarin)

| Peptide | Sequence                           | Structure                                                                            | Expected m/z (M+H <sup>+</sup> ) | Observed m/z (M+H <sup>+</sup> ) |
|---------|------------------------------------|--------------------------------------------------------------------------------------|----------------------------------|----------------------------------|
| T-D7    | eH-Dap(A7)SYwLRPG-NH <sub>2</sub>  | 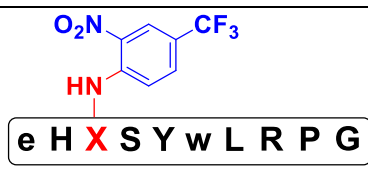   | 1400.6                           | 1401.0                           |
| T-D8    | eH-Dap(A8)SYwLRPG-NH <sub>2</sub>  |    | 1346.6                           | 1346.7                           |
| T-D16   | eH-Dap(A16)SYwLRPG-NH <sub>2</sub> |    | 1362.6                           | 1363.1                           |
| SubF    | Ac-KQFK-ACC-NH <sub>2</sub>        |   | 792.4                            | 792.6                            |
| SubW    | Ac-KQWK-ACC-NH <sub>2</sub>        |  | 831.4                            | 831.9                            |
| SubY    | Ac-KQYK-ACC-NH <sub>2</sub>        |  | 808.4                            | 808.6                            |
| Sub4nF  | Ac-KQ-4nF-K-ACC-NH <sub>2</sub>    |  | 837.4                            | 837.8                            |

**Table S2. MALDI mass spectrometry characterization of peptides (continued)**  
 (Ac = acetyl, NH<sub>2</sub> = amidated C-terminus, X = 2,3-diaminopropionic acid residue,  
 ACC = 7-amino-4-carbamoylmethylcoumarin)

| Peptide | Sequence                            | Structure | Expected m/z (M+H <sup>+</sup> ) | Observed m/z (M+H <sup>+</sup> ) |
|---------|-------------------------------------|-----------|----------------------------------|----------------------------------|
| SubC1   | Ac-KQC(A1)K-ACC-NH <sub>2</sub>     |           | 869.4                            | 869.7                            |
| SubC3   | Ac-KQC(A3)K-ACC-NH <sub>2</sub>     |           | 903.3                            | 903.5                            |
| SubC16  | Ac-KQC(A16)K-ACC-NH <sub>2</sub>    |           | 899.4                            | 899.4                            |
| SubD1   | Ac-KQ-Dap(A1)K-ACC-NH <sub>2</sub>  |           | 852.4                            | 852.8                            |
| SubD3   | Ac-KQ-Dap(A3)K-ACC-NH <sub>2</sub>  |           | 886.4                            | 887.1                            |
| SubD16  | Ac-KQ-Dap(A16)K-ACC-NH <sub>2</sub> |           | 882.4                            | 882.7                            |

**Table S2. MALDI mass spectrometry characterization of peptides**  
 (Ac = acetyl, NH<sub>2</sub> = amidated C-terminus; r indicates nitro reduction to amine)

| Peptide | Sequence                        | Structure                                                                            | Expected m/z (M+H <sup>+</sup> ) | Observed m/z (M+H <sup>+</sup> ) |
|---------|---------------------------------|--------------------------------------------------------------------------------------|----------------------------------|----------------------------------|
| C1r     | Ac-C(A1r)LYKAG-NH <sub>2</sub>  | 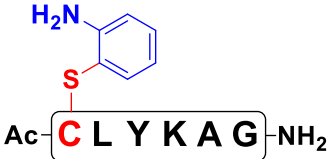   | 786.4                            | 785.8                            |
| C2r     | Ac-C(A2r)LYKAG-NH <sub>2</sub>  |    | 804.4                            | 803.6                            |
| C3r     | Ac-C(A3r)LYKAG-NH <sub>2</sub>  |    | 820.4                            | 819.9                            |
| C4r     | Ac-C(A4r)LYKAG-NH <sub>2</sub>  |   | 864.3                            | 863.4                            |
| C5r     | Ac-C(A5r)LYKAG-NH <sub>2</sub>  |  | 912.3                            | 911.3                            |
| C7r     | Ac-C(A7r)LYKAG-NH <sub>2</sub>  |  | 854.4                            | 854.1                            |
| C8r     | Ac-C(A8r)LYKAG-NH <sub>2</sub>  |  | 800.4                            | 799.6                            |
| C10r    | Ac-C(A10r)LYKAG-NH <sub>2</sub> |  | 811.4                            | 810.9                            |

**Table S2. MALDI mass spectrometry characterization of peptides**  
 (Ac = acetyl, NH<sub>2</sub> = amidated C-terminus; r indicates nitro reduction to amine)

| Peptide | Sequence                        | Structure                                                                            | Expected m/z (M+H <sup>+</sup> ) | Observed m/z (M+H <sup>+</sup> ) |
|---------|---------------------------------|--------------------------------------------------------------------------------------|----------------------------------|----------------------------------|
| C11r    | Ac-C(A11r)LYKAG-NH <sub>2</sub> | 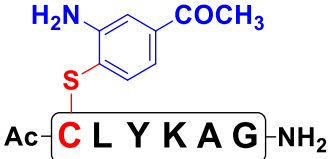   | 828.4                            | 827.6                            |
| C12r    | Ac-C(A12r)LYKAG-NH <sub>2</sub> |    | 829.4                            | 828.2                            |
| C13r    | Ac-C(A13r)LYKAG-NH <sub>2</sub> |    | 830.4                            | 829.4                            |
| C15r    | Ac-C(A15r)LYKAG-NH <sub>2</sub> |   | 801.4                            | 800.5                            |
| C18r    | Ac-C(A18r)LYKAG-NH <sub>2</sub> |  | 787.4                            | 786.5                            |
| C21r    | Ac-C(A21r)LYKAG-NH <sub>2</sub> |  | 804.4                            | 803.5                            |
| C22r    | Ac-C(A22r)LYKAG-NH <sub>2</sub> |  | 787.4                            | 786.5                            |
| C25r    | Ac-C(A25r)LYKAG-NH <sub>2</sub> |  | 804.4                            | 803.5                            |

**Table S2. MALDI mass spectrometry characterization of peptides  
(Ac = acetyl, NH<sub>2</sub> = amidated C-terminus; r indicates nitro reduction to amine)**

|             |                                          |                                                                                                                                                                                                                                                    |       |       |
|-------------|------------------------------------------|----------------------------------------------------------------------------------------------------------------------------------------------------------------------------------------------------------------------------------------------------|-------|-------|
| <b>C26r</b> | Ac-C( <b>A26r</b> )LYKAG-NH <sub>2</sub> | 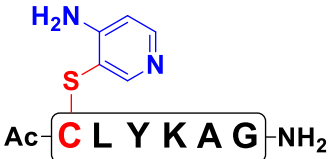 <p>Chemical structure showing the peptide backbone Ac-C(LYKAG)-NH<sub>2</sub> with a 3-amino-2-pyridylsulfanyl group attached to the Cysteine residue.</p>      | 787.4 | 786.4 |
| <b>C29r</b> | Ac-C( <b>A29r</b> )LYKAG-NH <sub>2</sub> |  <p>Chemical structure showing the peptide backbone Ac-C(LYKAG)-NH<sub>2</sub> with a 3-amino-4-fluorophenylsulfanyl group attached to the Cysteine residue.</p> | 804.4 | 803.7 |
| <b>C30r</b> | Ac-C( <b>A30r</b> )LYKAG-NH <sub>2</sub> |  <p>Chemical structure showing the peptide backbone Ac-C(LYKAG)-NH<sub>2</sub> with a 3-amino-2-pyridylsulfanyl group attached to the Cysteine residue.</p>      | 787.4 | 787.1 |

## Materials and Methods

**General Information.** Commercially purchased solvents and reagents were used without further purification. N $\alpha$ -Fmoc-protected amino acids and peptide synthesis reagents were purchased from Advanced ChemTech, ChemImpex International, Oakwood Chemical, Gyros Protein Technologies, and WuXi TIDES. Specialized amino acids are as follows: Boc-Ser(tBu)-OH (CAS 13734-38-8, Ambeed), Fmoc-Cys(Mmt)-OH (CAS 177582-21-7, WuXi), Fmoc-Dap(Mtt)-OH (CAS 654670-89-0, WuXi), pyroglutamic acid (CAS 98-79-3, Ambeed), Fmoc-D-Trp(Boc)-OH (CAS 163619-04-3, Oakwood), 3-(tritylthio)propionic acid (CAS 27144-18-9, Ambeed), Fmoc-L-homoarginine(Pbf)-OH (CAS 1159680-21-3, Ambeed). A complete list of nitroarenes (including CAS numbers and sources) is provided in the Supporting Information (Table S1). Plasmin was purchased from Hematologic Technologies as described previously.<sup>1</sup>

Peptides were purified on preparative C<sub>18</sub> columns using reverse-phase high-performance liquid chromatography (RP-HPLC) on a Shimadzu Nexera HPLC system using gradients of water and acetonitrile (ACN) containing 0.1% trifluoroacetic acid (TFA). Peptide purity was evaluated by analytical HPLC using a Luna 5  $\mu$ m C18(2) column (150  $\times$  4.6 mm) on an Agilent 1100 HPLC system with a flow rate of 0.3 mL/min (gradient: 5–95% solvent B over 30 min, solvent A = 0.1% aqueous TFA, B = 95% ACN, 5% water, 0.1% TFA; Figure S4). High-resolution mass spectrometry data were collected on a Shimadzu MALDI-8020 Benchtop MALDI-TOF mass spectrometer using  $\alpha$ -cyano-4-hydroxycinnamic acid as the matrix (Table S2).

**Synthesis of Compounds A14 and A17.** Compound **A14** (N-(4-fluoro-3-nitrophenyl)acetamide, CAS# 351-32-6) was prepared according to the method of Cordeiro *et al.*<sup>2</sup> Compound **A17** (4-(1,1-dimethylethoxy)-1-fluoro-2-nitrobenzene, CAS# 1369848-20-3) was prepared according to the method of Bartoli *et al.*<sup>3</sup>

**Peptide Synthesis.** All peptides were synthesized using a Gyros Protein Technologies PurePep<sup>TM</sup> Chorus synthesizer with peptide coupling reactions performed at 55 °C following standard Fmoc solid-phase approaches on Rink MBHA resin. All peptides were synthesized on low-loading resin (0.2-0.4 mmol/g resin). Dried Rink MBHA resin was swollen for 10 min in N,N-dimethylformamide (DMF) before the first deprotection reaction. Coupling reactions were performed using 4 mol equiv each of N $\alpha$ -Fmoc-protected amino acid, O-(1H-6-chlorobenzotriazole-1-yl)-1,1,3,3-tetramethyluronium hexafluorophosphate (HCTU), and N-methylmorpholine (NMM) at 55 °C. Deprotection of the Fmoc protecting group was carried out at RT by two sequential reactions of 15 min each using 20% (v/v) piperidine in DMF. Between coupling and deprotection reactions, the resin was washed three times with DMF. At the end of peptide synthesis, the peptide was washed with DMF (3 $\times$ ) and dichloromethane (DCM) (4 $\times$ ).

For the model peptide Ac-XLYKAG-NH<sub>2</sub> (X = Cys(Mmt) or Dap(Mtt)), Cys/Dap substituted  $\alpha$ -MSH variants, and Cys/Dap-substituted plasmin substrate peptides, the N-

terminal Fmoc group was removed as described above. After Fmoc removal, peptides were acetyl capped by reaction of 8 mol equiv acetic anhydride and 1 mol equiv N,N-diisopropylethylamine (DIEA) in 2-3 mL DMF for 30-60 min at RT. For variants of the other three peptides (SNEW, triptorelin, and eptifibatide), the N-terminal amino acids did not require further manipulation prior to arylation. For SNEW, the N-terminal serine was coupled as Boc-Ser(tBu)-OH. For triptorelin, the N-terminal pyroglutamic acid was coupled without protection. For eptifibatide, the N-terminal 3-mercaptopropionic acid was coupled as 3-(tritylthio)propionic acid.

At various points during synthesis, microcleavage reactions were performed by cleaving a small amount of resin with 1 mL of freshly prepared 95% TFA, 2.5% H<sub>2</sub>O, and 2.5% triisopropylsilane (TIPS) for 30 min. After dilution with 3–4 mL acetonitrile, 1 μL of sample was mixed with 4 μL of saturated α-cyano-4-hydroxycinammic acid (CHCA, saturated solution prepared in 1:1 acetonitrile/water with 0.1% trifluoroacetic acid). A 1 μL volume of this mixture was added to a stainless steel MALDI plate and analyzed by MALDI.

#### **Selective Deprotection of Cys(Mmt) and Dap(Mtt).**

Mmt and Mtt deprotection were performed using 1% TFA and 5% TIPS in DCM (100 mL/mmol peptide). After 5 minutes, the deprotection solution was filtered out, and a fresh batch of deprotection solution was added. This procedure was repeated until no visible color was observed in the deprotection solution (typically 6-8 rounds). For Cys-containing peptides, deprotection was performed immediately before arylation to minimize competing oxidation/disulfide bond formation.

#### **Selective Deprotection of Cys(STmp).**

For Cys variants of dihydro-eptifibatide, which already has one cysteine residue and a 3-mercaptopropionyl group at the N-terminus in addition to the Cys/Dap residue to be modified, we incorporated Cys(STmp) at the site of modification instead of Cys(Mmt) because the standard trityl protecting group for cysteine is partially removed during Mmt deprotection.<sup>4</sup> For STmp deprotection on resin, we followed the protocol described by Postma *et al.*<sup>4</sup> Briefly, a solution containing 5% (w/v) dithiothreitol (DTT) and 0.1 M N-methylmorpholine was prepared in DMF. This solution was added to the resin, reacted for 5 min at RT, and filtered out. This procedure was repeated three times with freshly prepared solution each time.

#### **Selective Deprotection of Dap(Alloc).**

For dihydro-eptifibatide, we incorporated Dap(Alloc) at the site of modification instead of Dap(Mtt). For Alloc deprotection on resin, we followed the protocol described by Gomez-Martinez *et al* and others.<sup>5,6</sup> Briefly, a solution containing 0.1 mol equiv tetrakis(triphenylphosphine)palladium(0) (Pd(PPh<sub>3</sub>)<sub>4</sub>) and 5 mol equiv triphenylphosphine (PPh<sub>3</sub>) was prepared in DCM, added to DCM-washed resin with 6 mol equiv ammonia-borane complex (H<sub>3</sub>N·BH<sub>3</sub>), and shaken for 30 min at RT. This procedure was repeated a second time with 0.2 mol equiv Pd(PPh<sub>3</sub>)<sub>4</sub> with filtration after each round of deprotection.

After deprotection, the resin was sequentially washed as follows: 4× DCM, 2× 0.2% TFA in DCM, 3× DCM, 4× 5% DIEA in DCM, 4× DCM, and 3× DMF. Once washed, a solution containing 5% diethyldithiocarbamate in DMF was prepared to remove residual Pd. The resin was shaken three times for 5 min at RT with portions of this solution with filtration after each round.

**Cysteine Arylation.** Immediately after Cys side-chain deprotection, the resin was washed 3x with DCM. A solution containing 5 mol equiv of fluoronitroarene and 5 mol equiv of DIEA was prepared in DMF (10 mL/mmol peptide). After washing the resin 3x with DMF, the fluoronitroarene solution was immediately and carefully added to completely cover the resin. Arylation reactions were shaken overnight (16-20 h) at RT. After arylation, the solution was filtered, and the resin was washed 3x DCM and 3x DMF then dried 2x with diethyl ether. For all peptides other than the model peptide, 10 mol equiv of fluoronitroarene and 10 mol equiv of DIEA were added instead of 5 mol equiv of each.

**Dap Arylation.** After Dap side-chain deprotection, the resin was washed 3x DCM and 3x DMF then dried 2x with diethyl ether. Dried resin was then added to a microcentrifuge tube. A solution containing 5 mol equiv fluoronitroarene and 10 mol equiv DIEA in DMF (10 mL/mmol peptide) was added to the resin. The tubes were sealed and added to an oil bath at 50-60 °C overnight (16-20 h). For all peptides other than the model peptide, 10 mol equiv of fluoronitroarene and 20 mol equiv of DIEA were added.

**Peptide Cleavage.** Peptides were globally deprotected and cleaved from resin by incubation with a cocktail of 95% TFA, 2.5% water, and 2.5% TIPS for 2 h. After filtration, rotary evaporation of TFA and precipitation with ice-cold diethyl ether yielded the crude peptide. Isolated yields indicate the mass recovered after a single round of reversed-phase HPLC.

**Nitro Reduction.** Peptides were dissolved to 150 mM in dimethylsulfoxide (DMSO) solution with 4 mol equiv hypodiboric acid,  $B_2(OH)_4$ , and 5 mol% 4,4'-bipyridine catalyst for 10 min. Solutions of reducing agent and catalyst in DMSO were prepared separately and then combined to form a dark blue solution. The dark blue reducing agent-catalyst solution was then added immediately to the peptide solution before the dark blue color faded, which occurs within one minute of combination.<sup>7</sup> Reactions were stopped after 10 min by dilution with water and frozen at -20°C until purified by reversed-phase HPLC.

**Nuclear Magnetic Resonance (NMR) Spectroscopy.** Purified peptides **C1-C33**, **C35**, and **D1-D34** were dissolved in water and diluted to 1 mM in a 90% $H_2O$ /10%  $D_2O$  mixture. All  $^1H$  NMR spectra were collected on a Bruker 400 MHz NMR spectrometer using the ZGESGP pulse sequence for water suppression (32-48 scans, SWH = 4K, TD = 32768, Figure S5).

**UV-Visible Spectrophotometry.** Purified peptides **C1-C33**, **C35**, and **D1-D34** were dissolved in water and diluted to 15 mM for acquisition of an initial absorbance spectrum

from 220 nm to 750 nm. Based on this measurement, a peptide dilution was prepared with a target  $A_{280}$  value of 1.0. This dilution was then used as the starting point for a 1.5-fold serial dilution to prepare 3-4 additional dilutions within the 0.1-1.0 range for  $A_{280}$ . Linear regression was applied to the absorbance values for the local maxima at wavelengths greater than 300 nm ( $\lambda_{\max,2}$ ) to estimate the extinction coefficients at those wavelengths for the nitroarylated residues.

**Plasmin Activity Assays.** Plasmin activity assays were performed as described by Harris *et al.*<sup>1</sup> Briefly, a stock solution for each plasmin substrate was prepared at 20  $\mu\text{M}$  in assay buffer (50 mM Tris pH 7.5, 100 mM NaCl, 0.1% Pluronic acid). These solutions were further diluted to either 5 or 2.5  $\mu\text{M}$  in assay buffer, and 45  $\mu\text{L}$  volumes were added to triplicate wells of a black round-bottom 96-well plate. A solution containing 10 nM plasmin was prepared by diluting 1  $\mu\text{L}$  of plasmin stock solution (5.0 mg/mL, 8.96 U/mg) in 6.023 mL assay buffer.

Before the assay, the 96-well plate was added to a Biotek Synergy H1 96-well plate reader pre-equilibrated to 25 °C, and fluorescence was measured using excitation and emission wavelengths of 380 nm and 450 nm, respectively, to establish the baseline fluorescence of each substrate/well. To start the assay, a volume of 5  $\mu\text{L}$  of 10 nM plasmin was added to a single row (10 substrate-containing wells + 2 wells containing only assay buffer) using a multichannel pipette. The 96-well plate was then immediately added to the plate reader, and after 5 s of shaking, fluorescence was monitored every 10 s for 5 min using 380 nm and 450 nm as excitation and emission wavelengths, respectively. This procedure was repeated until all substrate-containing wells were read. Only 12 wells were read per addition of plasmin to ensure that all wells were read within the 10 s time interval.

For data analysis, the average buffer fluorescence was subtracted from each sample, and replicate samples were averaged. The rate of change in fluorescence over 60 s was then determined by subtracting the fluorescence value at 0 s from the fluorescence value at 60 s. The rate of change in fluorescence was normalized to the substrate concentrations used (4.5 or 2.25  $\mu\text{M}$ ), and these normalized rates were averaged as a measure of plasmin activity on a given substrate.

## References:

- (1) J. L. Harris, B. J. Backes, F. Leonetti, S. Mahrus, J. A. Ellman and C. S. Craik, Rapid and general profiling of protease specificity by using combinatorial fluorogenic substrate libraries, *Proc. Natl. Acad. Sci.* 2000, **97**, 7754-7759.
- (2) L. Cordeiro, H. Diniz-Neto, P. Figueiredo, H. Souza, A. Sousa, F. Andrade-Júnior, T. Melo, E. Ferreira, R. Oliveira, P. Athayde-Filho, J. Barbosa-Filho, A. Oliveira-Filho and E. Lima, Potential of 2-Chloro-N-(4-fluoro-3-nitrophenyl)acetamide Against *Klebsiella pneumoniae* and In Vitro Toxicity Analysis, *Molecules* [Online early access]. DOI: 10.3390/molecules251739592020.
- (3) G. Bartoli, M. Bosco, M. Locatelli, E. Marcantoni, P. Melchiorre and L. Sambri, Unusual and Unexpected Reactivity of t-Butyl Dicarboxylate (Boc<sub>2</sub>O) with Alcohols in the Presence of Magnesium Perchlorate. A New and General Route to t-Butyl Ethers, *Org. Lett.* 2005, **7**, 427-430.
- (4) T. M. Postma, M. Giraud and F. Albericio, Trimethoxyphenylthio as a Highly Labile Replacement for tert-Butylthio Cysteine Protection in Fmoc Solid Phase Synthesis, *Org. Lett.* 2012, **14**, 5468-5471.
- (5) P. Gomez-Martinez, M. Dessolin, F. Guibé and F. Albericio, N $\alpha$ -Alloc temporary protection in solid-phase peptide synthesis. The use of amine–borane complexes as allyl group scavengers, *J. Chem. Soc. Perkin Trans. 1* 1999, 2871-2874.
- (6) J. C. Tennett, S. R. Epstein and N. Sawyer, Enhanced EphB2-Specific Peptide Inhibitors through Stabilization of Polyproline II Helical Structure, *ACS Chem. Biol.* 2024, **19**, 1214-1221.
- (7) M. Jang, T. Lim, B. Y. Park and M. S. Han, Metal-Free, Rapid, and Highly Chemoselective Reduction of Aromatic Nitro Compounds at Room Temperature, *J. Org. Chem.* 2022, **87**, 910-919.
